# Supplementary material for: Integrative Multi-Omics Analysis of Oncogenic EZH2 Mutants: From Epigenetic Reprogramming to Molecular Signatures
Source: MDPI journal article supplement (doi:10.3390/ijms241411378), 2023-07-12
Supplement: s1 [file s1]

**Supplementary Table S1.** ATAC-Seq enriched motifs in EZH2 GOF mutants.

| Name  | Composite Logo                                                                      | p-value               |                       |
|-------|-------------------------------------------------------------------------------------|-----------------------|-----------------------|
|       |                                                                                     | EZH2 <sup>Y641F</sup> | EZH2 <sup>A677G</sup> |
| ATF1  |    | 1E-169                | NF                    |
| FOXF1 |    | NF                    | 1E-68                 |
| FOXO1 |    | 1E-249                | NF                    |
| GATA4 |    | 1E-64                 | 1E-41                 |
| HOXB9 |    | 1E-53                 | NF                    |
| RELA  |  | NF                    | 1E-56                 |
| SMAD3 |  | 1E-129                | NF                    |
| SMAD4 |  | 1E-86                 | 1E-27                 |
| ZIC2  |  | 1E-164                | 1E-59                 |

NF, Not found significant.
