# Supplementary material for: Integrative Multi-Omics Analysis of Oncogenic EZH2 Mutants: From Epigenetic Reprogramming to Molecular Signatures
Source: Int J Mol Sci. 2023 Jul 12;24(14):11378. doi: 10.3390/ijms241411378 (PMC10380343; doi:10.3390/ijms241411378)
Supplement: Supplementary file 1 [file ijms-24-11378-s001.zip]

Archive with 6 entries (6 files):
- Supplementary_Figures.pdf
- Supplementary_Table_S1.pdf
- Supplementary_Table_S2.xlsx
- Supplementary_Table_S3.xlsx
- Supplementary_Table_S4.xlsx
- Supplementary_Table_S5.xlsx
