# Supplementary material for: Integrative Multi-Omics Analysis of Oncogenic EZH2 Mutants: From Epigenetic Reprogramming to Molecular Signatures
Source: Int J Mol Sci. 2023 Jul 12;24(14):11378. doi: 10.3390/ijms241411378 (PMC10380343; doi:10.3390/ijms241411378)
Supplement: Supplementary file 1 [file ijms-24-11378-s001.zip › Supplementary_Table_S2.xlsx]

## Sheet: Supplementary_Table_S2
Symbol	EntrezID	Ensembl	Name	Experimental evidence of EZH2 targeting
ACADL	33	ENSG00000115361	acyl-CoA dehydrogenase long chain	[61]
ADGRG6	57211	ENSG00000112414	adhesion G protein-coupled receptor G6
ADORA1	134	ENSG00000163485	adenosine A1 receptor
AFAP1L1	134265	ENSG00000157510	actin filament associated protein 1 like 1	[52], [53]
ALX4	60529	ENSG00000052850	ALX homeobox 4	[52], [53]
ANKRD33B	651746	ENSG00000164236	ankyrin repeat domain 33B	[52], [53]
ARFGEF3	57221	ENSG00000112379	ARFGEF family member 3
BARX2	8538	ENSG00000043039	BARX homeobox 2	[52]
BOC	91653	ENSG00000144857	BOC cell adhesion associated, oncogene regulated	[52]
CA8	767	ENSG00000178538	carbonic anhydrase 8
CAMK4	814	ENSG00000152495	calcium/calmodulin dependent protein kinase IV	[52]
CD1D	912	ENSG00000158473	CD1d molecule	[59]
CD55	1604	ENSG00000196352	CD55 molecule (Cromer blood group)	[62]
CDO1	1036	ENSG00000129596	cysteine dioxygenase type 1
CHST2	9435	ENSG00000175040	carbohydrate sulfotransferase 2	[47]
CLVS2	134829	ENSG00000146352	clavesin 2	[52]
CNPY1	285888	ENSG00000146910	canopy FGF signaling regulator 1	[52]
COL25A1	84570	ENSG00000188517	collagen type XXV alpha 1 chain	[51], [52]
COL4A4	1286	ENSG00000081052	collagen type IV alpha 4 chain	[57]
COLGALT2	23127	ENSG00000198756	collagen beta(1-O)galactosyltransferase 2
CR2	1380	ENSG00000117322	complement C3d receptor 2
CTNNA3	29119	ENSG00000183230	catenin alpha 3
CYP2J2	1573	ENSG00000134716	cytochrome P450 family 2 subfamily J member 2	[51]
DAAM2	23500	ENSG00000146122	dishevelled associated activator of morphogenesis 2	[63]
DCDC2	51473	ENSG00000146038	doublecortin domain containing 2
DNM3	26052	ENSG00000197959	dynamin 3	[53]
DSC3	1825	ENSG00000134762	desmocollin 3	[52]
EDNRA	1909	ENSG00000151617	endothelin receptor type A
EGFLAM	133584	ENSG00000164318	EGF like, fibronectin type III and laminin G domains	[52]
EGFR	1956	ENSG00000146648	epidermal growth factor receptor	[52]
EN2	2020	ENSG00000164778	engrailed homeobox 2	[52]
ENC1	8507	ENSG00000171617	ectodermal-neural cortex 1
FAM83B	222584	ENSG00000168143	family with sequence similarity 83 member B
FAT3	120114	ENSG00000165323	FAT atypical cadherin 3
FGFBP1	9982	ENSG00000137440	fibroblast growth factor binding protein 1
FHOD3	80206	ENSG00000134775	formin homology 2 domain containing 3	[52]
GALNT3	2591	ENSG00000115339	polypeptide N-acetylgalactosaminyltransferase 3	[52]
GAP43	2596	ENSG00000172020	growth associated protein 43	[64]
GASK1A	729085	ENSG00000144649	golgi associated kinase 1A
GHR	2690	ENSG00000112964	growth hormone receptor	[52]
GMPR	2766	ENSG00000137198	guanosine monophosphate reductase	[53]
GNG12	55970	ENSG00000172380	G protein subunit gamma 12	[52]
GNG2	54331	ENSG00000186469	G protein subunit gamma 2	[51], [47]
GUCY1A2	2977	ENSG00000152402	guanylate cyclase 1 soluble subunit alpha 2	[51], [52]
HECW2	57520	ENSG00000138411	HECT, C2 and WW domain containing E3 ubiquitin protein ligase 2	[52]
HLF	3131	ENSG00000108924	HLF transcription factor, PAR bZIP family member	[52], [65]
HOOK1	51361	ENSG00000134709	hook microtubule tethering protein 1
ITGA2	3673	ENSG00000164171	integrin subunit alpha 2	[52]
ITGA4	3676	ENSG00000115232	integrin subunit alpha 4	[51]
ITGA6	3655	ENSG00000091409	integrin subunit alpha 6
JPH3	57338	ENSG00000154118	junctophilin 3	[51], [52]
KALRN	8997	ENSG00000160145	kalirin RhoGEF kinase	[51], [52], [53]
KIAA0040	9674	ENSG00000235750	KIAA0040	[53], [47]
LYPD6B	130576	ENSG00000150556	LY6/PLAUR domain containing 6B	[52]
MAP7	9053	ENSG00000135525	microtubule associated protein 7	[53]
MET	4233	ENSG00000105976	MET proto-oncogene, receptor tyrosine kinase	[52], [58]
MFAP3L	9848	ENSG00000198948	microfibril associated protein 3 like
NFASC	23114	ENSG00000163531	neurofascin	[53]
NID2	22795	ENSG00000087303	nidogen 2	[52]
NR3C2	4306	ENSG00000151623	nuclear receptor subfamily 3 group C member 2	[52]
NRCAM	4897	ENSG00000091129	neuronal cell adhesion molecule	[52]
NRG2	9542	ENSG00000158458	neuregulin 2	[52]
NRP2	8828	ENSG00000118257	neuropilin 2
NTN4	59277	ENSG00000074527	netrin 4	[52]
PDE4B	5142	ENSG00000184588	phosphodiesterase 4B	[47]
PGBD5	79605	ENSG00000177614	piggyBac transposable element derived 5	[53]
PKIB	5570	ENSG00000135549	cAMP-dependent protein kinase inhibitor beta	[66]
PMEPA1	56937	ENSG00000124225	prostate transmembrane protein, androgen induced 1	[52], [47]
PPARGC1A	10891	ENSG00000109819	PPARG coactivator 1 alpha	[67]
PPP1R14C	81706	ENSG00000198729	protein phosphatase 1 regulatory inhibitor subunit 14C	[52], [47]
PRELID2	153768	ENSG00000186314	PRELI domain containing 2
PRKCQ	5588	ENSG00000065675	protein kinase C theta	[68]
PRRT4	401399	ENSG00000224940	proline rich transmembrane protein 4	[52]
PTPRO	5800	ENSG00000151490	protein tyrosine phosphatase receptor type O	[47]
PTPRZ1	5803	ENSG00000106278	protein tyrosine phosphatase receptor type Z1
QRFPR	84109	ENSG00000186867	pyroglutamylated RFamide peptide receptor	[52]
RAB32	10981	ENSG00000118508	RAB32, member RAS oncogene family
RAB3C	115827	ENSG00000152932	RAB3C, member RAS oncogene family
RAB6D	150786	ENSG00000233087	RAB6D, member RAS oncogene family
RAI14	26064	ENSG00000039560	retinoic acid induced 14	[52]
RASSF5	83593	ENSG00000266094	Ras association domain family member 5	[60]
RFTN1	23180	ENSG00000131378	raftlin, lipid raft linker 1	[52], [53]
RGS4	5999	ENSG00000117152	regulator of G protein signaling 4
RGS7	6000	ENSG00000182901	regulator of G protein signaling 7
RNF144B	255488	ENSG00000137393	ring finger protein 144B	[47]
RNF182	221687	ENSG00000180537	ring finger protein 182	[51], [52], [47]
ROR1	4919	ENSG00000185483	receptor tyrosine kinase like orphan receptor 1	[52]
RPRM	56475	ENSG00000177519	reprimo, TP53 dependent G2 arrest mediator homolog	[52]
SAMD5	389432	ENSG00000203727	sterile alpha motif domain containing 5	[52], [53]
SERPINE2	5270	ENSG00000135919	serpin family E member 2	[53], [47]
SLC16A9	220963	ENSG00000165449	solute carrier family 16 member 9	[51],
SLC35F1	222553	ENSG00000196376	solute carrier family 35 member F1	[52]
SLC4A4	8671	ENSG00000080493	solute carrier family 4 member 4	[52], [53], [47]
SLC9A2	6549	ENSG00000115616	solute carrier family 9 member A2
SPOCK1	6695	ENSG00000152377	SPARC (osteonectin), cwcv and kazal like domains proteoglycan 1
SPON1	10418	ENSG00000262655	spondin 1	[51], [52]
ST6GALNAC3	256435	ENSG00000184005	ST6 N-acetylgalactosaminide alpha-2,6-sialyltransferase 3
TENM4	26011	ENSG00000149256	teneurin transmembrane protein 4
TMEM108	66000	ENSG00000144868	transmembrane protein 108	[51], [52]
TMTC1	83857	ENSG00000133687	transmembrane O-mannosyltransferase targeting cadherins 1	[52]
TSLP	85480	ENSG00000145777	thymic stromal lymphopoietin	[52]
TSPAN11	441631	ENSG00000110900	tetraspanin 11	[52]
TSPAN5	10098	ENSG00000168785	tetraspanin 5	[53]
VAV3	10451	ENSG00000134215	vav guanine nucleotide exchange factor 3	[51],
VDR	7421	ENSG00000111424	vitamin D receptor	[52], [47]
VGLL2	245806	ENSG00000170162	vestigial like family member 2	[52]
WNT16	51384	ENSG00000002745	Wnt family member 16	[52]
ZDHHC22	283576	ENSG00000177108	zinc finger DHHC-type palmitoyltransferase 22	[52]

## Sheet: References
References from manuscript
[47]	McCabe, M.T.; Ott, H.M.; Ganji, G.; Korenchuk, S.; Thompson, C.; Van Aller, G.S.; Liu, Y.; Graves, A.P.; III, A.D.P.; Diaz, E.; et al. EZH2 Inhibition as a Therapeutic Strategy for Lymphoma with EZH2-Activating Mutations. Nature 2012, 492, 108–112. https://doi.org/10.1038/nature11606.
[51]	Dreger, H.; Ludwig, A.; Weller, A.; Stangl, V.; Baumann, G.; Meiners, S.; Stangl, K. Epigenetic Regulation of Cell Adhesion and Communication by Enhancer of Zeste Homolog 2 in Human Endothelial Cells. Hypertension 2012, 60, 1176–1183. https://doi.org/10.1161/HYPERTENSIONAHA.112.191098.
[52]	Xu, J.; Shao, Z.; Li, D.; Xie, H.; Kim, W.; Huang, J.; Taylor, J.E.; Pinello, L.; Glass, K.; Jaffe, J.D.; et al. Developmental Control of Polycomb Subunit Composition by GATA Factors Mediates a Switch to Non-Canonical Functions. Mol. Cell 2015, 57, 304–316. https://doi.org/10.1016/j.molcel.2014.12.009.
[53]	Cai, Y.; Zhang, Y.; Loh, Y.P.; Tng, J.Q.; Lim, M.C.; Cao, Z.; Raju, A.; Lieberman Aiden, E.; Li, S.; Manikandan, L.; et al. H3K27me3-Rich Genomic Regions Can Function as Silencers to Repress Gene Expression via Chromatin Interactions. Nat. Commun. 2021, 12, 719. https://doi.org/10.1038/s41467-021-20940-y.
[57]	Chu, L.; Qu, Y.; An, Y.; Hou, L.; Li, J.; Li, W.; Fan, G.; Song, B.-L.; Li, E.; Zhang, L.; et al. Induction of Senescence-Associated Secretory Phenotype Underlies the Therapeutic Efficacy of PRC2 Inhibition in Cancer. Cell Death Dis. 2022, 13, 155. https://doi.org/10.1038/s41419-022-04601-6.
[58]	Quan, C.; Chen, Y.; Wang, X.; Yang, D.; Wang, Q.; Huang, Y.; Petersen, R.B.; Liu, X.; Zheng, L.; Li, Y.; et al. Loss of Histone Lysine Methyltransferase EZH2 Confers Resistance to Tyrosine Kinase Inhibitors in Non-Small Cell Lung Cancer. Cancer Lett. 2020, 495, 41–52. https://doi.org/10.1016/j.canlet.2020.09.003.
[59]	Chaudhry, M.S.; Karadimitris, A. Role and Regulation of CD1d in Normal and Pathological B Cells. J. Immunol. 2014, 193, 4761–4768. https://doi.org/10.4049/jimmunol.1401805.
[60]	Tiffen, J.; Gallagher, S.J.; Filipp, F.; Gunatilake, D.; Al Emran, A.; Cullinane, C.; Dutton-Register, K.; Aoude, L.; Hayward, N.; Chatterjee, A.; et al. EZH2 Cooperates with DNA Methylation to Downregulate Key Tumor Suppressors and IFN Gene Signatures in Melanoma. J. Investig. Dermatol. 2020, 140, 2442–2454.e5. https://doi.org/10.1016/j.jid.2020.02.042.
[61]	Hu, F.-F.; Chen, H.; Duan, Y.; Lan, B.; Liu, C.-J.; Hu, H.; Dong, X.; Zhang, Q.; Cheng, Y.-M.; Liu, M.; et al. CBX2 and EZH2 Cooperatively Promote the Growth and Metastasis of Lung Adenocarcinoma. Mol. Ther. Nucleic Acids 2022, 27, 670–684. https://doi.org/10.1016/j.omtn.2021.12.032.
[62]	Wang, J.; Yu, X.; Gong, W.; Liu, X.; Park, K.-S.; Ma, A.; Tsai, Y.-H.; Shen, Y.; Onikubo, T.; Pi, W.-C.; et al. EZH2 Noncanonically Binds CMyc and P300 through a Cryptic Transactivation Domain to Mediate Gene Activation and Promote Oncogenesis. Nat. Cell Biol. 2022, 24, 384–399. https://doi.org/10.1038/s41556-022-00850-x.
[63]	Kader, B.A.; Distefano, R.; West, K.; West, A. EZH2 Inhibition in Glioblastoma Stem Cells Increases the Expression of Neuronal Genes and the Neuronal Developmental Regulators ZIC2, ZNF423 and MAFB 2021. bioRxiv 2021, https://doi.org/10.1101/2021.11.22.469535.
[64]	Burdach, S.; Plehm, S.; Unland, R.; Borkhardt, A.; Staege, M.S.; Müller-Tidow, C.; Richter, G.H.S. Epigenetic Maintenance of Stemness and Malignancy in Peripheral Neuroectodermal Tumors by EZH2. Cell Cycle 2009, 8, 1991–1996. https://doi.org/10.4161/cc.8.13.8929.
[65]	Wang, C.; Oshima, M.; Sato, D.; Matsui, H.; Kubota, S.; Aoyama, K.; Nakajima-Takagi, Y.; Koide, S.; Matsubayashi, J.; Mochizuki-Kashio, M.; et al. Ezh2 Loss Propagates Hypermethylation at T Cell Differentiation–Regulating Genes to Promote Leukemic Transformation. J. Clin. Investig. 2018, 128, 3872–3886. https://doi.org/10.1172/JCI94645.
[66]	Pal, B.; Bouras, T.; Shi, W.; Vaillant, F.; Sheridan, J.M.; Fu, N.; Breslin, K.; Jiang, K.; Ritchie, M.E.; Young, M.; et al. Global Changes in the Mammary Epigenome Are Induced by Hormonal Cues and Coordinated by Ezh2. Cell Rep. 2013, 3, 411–426. https://doi.org/10.1016/j.celrep.2012.12.020.
[67]	Liang, J.; Yu, D.; Luo, C.; Bennett, C.; Jedrychowski, M.; Gygi, S.P.; Widlund, H.R.; Puigserver, P. Epigenetic Suppression of PGC1α (PPARGC1A) Causes Collateral Sensitivity to HMGCR-Inhibitors within BRAF-Treatment Resistant Melanomas. Nat. Commun. 2023, 14, 3251. https://doi.org/10.1038/s41467-023-38968-7.
[68]	Syed, S.A.; Hayashi, Y.; Lee, J.-H.; Yan, H.; Lorincz, A.; Strege, P.R.; Gajdos, G.B.; Milosavljevic, S.; Nie, J.; Rumessen, J.J.; et al. Ezh2-Dependent Epigenetic Reprogramming Controls a Developmental Switch between Modes of Gastric Neuromuscular Regulation. bioRxiv 2018, https://doi.org/10.1101/486423.
