# Supplementary material for: Integrative Multi-Omics Analysis of Oncogenic EZH2 Mutants: From Epigenetic Reprogramming to Molecular Signatures
Source: Int J Mol Sci. 2023 Jul 12;24(14):11378. doi: 10.3390/ijms241411378 (PMC10380343; doi:10.3390/ijms241411378)
Supplement: Supplementary file 1 [file ijms-24-11378-s001.zip › Supplementary_Table_S3.xlsx]

## Sheet: RNA-Seq
Symbol	EntrezID	Uniprot	logFC (A677G/WT)	p-value	q-value
NEGR1	257194	Q7Z3B1	-2.8	1.4 × 10⁻⁵	2.7 × 10⁻⁴
NWD2	57495	Q9ULI1	-2.7	6.3 × 10⁻⁶	1.4 × 10⁻⁴
UPK1B	7348	O75841	-2.7	2.9 × 10⁻⁶	7.2 × 10⁻⁵
LMO3	55885	A0A024RAT1	-2.6	1.4 × 10⁻⁷	5.9 × 10⁻⁶
KCNK2	3776	O95069	-2.5	8.3 × 10⁻¹⁴	2.8 × 10⁻¹¹
PGR	5241	P06401	-2.4	1.9 × 10⁻⁵	3.5 × 10⁻⁴
SLC35F3	148641	Q8IY50	-2.4	2.9 × 10⁻⁵	5.0 × 10⁻⁴
RAB3C	115827	Q96E17	-2.3	2.4 × 10⁻⁶	6.2 × 10⁻⁵
CYP7B1	9420	Q05C57	-2.3	3.2 × 10⁻⁵	5.4 × 10⁻⁴
KCNV1	27012	Q6PIU1	-2.3	5.3 × 10⁻⁷	1.7 × 10⁻⁵
ABLIM3	22885	O94929	-2.3	2.6 × 10⁻⁵	4.6 × 10⁻⁴
ABCC9	10060	A0A024RAV7	-2.2	7.1 × 10⁻⁵	1.0 × 10⁻³
NPY5R	4889	Q15761	-2.2	1.0 × 10⁻⁶	3.1 × 10⁻⁵
KCND2	3751	A4D0V9	-2.2	6.6 × 10⁻⁸	3.3 × 10⁻⁶
SMIM43	132332	Q4W5P6	-2.1	4.7 × 10⁻⁴	4.7 × 10⁻³
NRXN1	9378	Q9ULB1	-2.1	1.7 × 10⁻⁸	1.1 × 10⁻⁶
RIPOR2	9750	Q9Y4F9	-2.1	6.8 × 10⁻⁶	1.5 × 10⁻⁴
CLVS2	134829	Q5SYC1	-2.0	5.8 × 10⁻⁹	4.0 × 10⁻⁷
ZNF365	22891	Q70YC5	-2.0	8.3 × 10⁻⁹	5.5 × 10⁻⁷
RGS7	6000	P49802	-2.0	2.6 × 10⁻⁶	6.6 × 10⁻⁵
PLPPR4	9890	Q7Z2D5	-1.9	3.5 × 10⁻¹⁰	3.9 × 10⁻⁸
ST6GAL2	84620	Q96JF0	-1.9	2.8 × 10⁻⁴	3.1 × 10⁻³
MAL2	114569	A0A024R9E4	-1.9	2.9 × 10⁻⁸	1.6 × 10⁻⁶
NPY1R	4886	P25929	-1.9	2.5 × 10⁻¹⁰	3.0 × 10⁻⁸
PRRX1	5396	P54821	-1.9	6.6 × 10⁻⁹	4.5 × 10⁻⁷
AVPR1A	552	P37288	-1.9	2.9 × 10⁻⁵	4.9 × 10⁻⁴
SLC27A6	28965	Q9Y2P4	-1.9	1.1 × 10⁻⁹	9.5 × 10⁻⁸
PDGFD	80310	Q9GZP0	-1.9	8.0 × 10⁻¹⁰	7.4 × 10⁻⁸
COL12A1	1303	Q99715	-1.9	1.0 × 10⁻³	8.4 × 10⁻³
VGLL2	245806	Q8N8G2	-1.8	4.7 × 10⁻⁷	1.6 × 10⁻⁵
OAS3	4940	Q9Y6K5	-1.8	4.3 × 10⁻⁹	3.1 × 10⁻⁷
ST6GALNAC5	81849	B4DV27	-1.8	4.4 × 10⁻⁸	2.3 × 10⁻⁶
RXRG	6258	A0A087WZ88	-1.8	6.9 × 10⁻⁹	4.7 × 10⁻⁷
EPB41L4A-DT	54508		-1.8	2.9 × 10⁻³	1.9 × 10⁻²
ANKRD36BP2	645784		-1.8	4.1 × 10⁻⁴	4.2 × 10⁻³
SLCO3A1	28232	Q9UIG8	-1.8	3.3 × 10⁻⁴	3.6 × 10⁻³
NOD2	64127	Q9HC29	-1.7	1.5 × 10⁻³	1.2 × 10⁻²
PTPRO	5800	Q16827	-1.7	4.6 × 10⁻⁵	7.2 × 10⁻⁴
PTPRZ1	5803	B4DFE7	-1.7	6.7 × 10⁻⁸	3.3 × 10⁻⁶
L3MBTL4	91133	F8W9S8	-1.7	4.8 × 10⁻⁷	1.6 × 10⁻⁵
GAP43	2596	P17677	-1.7	3.5 × 10⁻⁶	8.7 × 10⁻⁵
NHLH2	4808	A0A024R0I7	-1.7	8.7 × 10⁻⁸	4.1 × 10⁻⁶
LSAMP	4045	B7Z661	-1.7	1.1 × 10⁻⁸	6.9 × 10⁻⁷
ADRA1B	147	P35368	-1.7	1.7 × 10⁻³	1.2 × 10⁻²
SP110	3431	Q9HB58	-1.7	1.3 × 10⁻⁵	2.6 × 10⁻⁴
COL4A4	1286	P53420	-1.6	1.0 × 10⁻⁶	3.1 × 10⁻⁵
PTGER3	5733	P43115	-1.6	9.9 × 10⁻⁴	8.4 × 10⁻³
EVA1A	84141	Q9H8M9	-1.6	5.9 × 10⁻⁵	9.0 × 10⁻⁴
OR2W3	343171	Q7Z3T1	-1.6	2.3 × 10⁻⁴	2.7 × 10⁻³
IL10RA	3587	Q13651	-1.6	7.4 × 10⁻⁴	6.7 × 10⁻³
C4orf19	55286	A0A024R9R1	-1.6	2.7 × 10⁻³	1.8 × 10⁻²
FAM133A	286499	Q8N9E0	-1.6	2.0 × 10⁻⁴	2.4 × 10⁻³
PRR16	51334	Q569H4	-1.6	7.1 × 10⁻⁶	1.6 × 10⁻⁴
IFI44L	10964	Q53G44	-1.6	7.8 × 10⁻⁴	7.0 × 10⁻³
PGM5	5239	Q15124	-1.6	1.3 × 10⁻⁷	5.5 × 10⁻⁶
CCDC68	80323	A0A024R2B9	-1.6	8.6 × 10⁻¹¹	1.1 × 10⁻⁸
FAM110C	642273	Q1W6H9	-1.5	1.1 × 10⁻⁴	1.5 × 10⁻³
TENM4	26011	Q6N022	-1.5	1.4 × 10⁻¹¹	2.4 × 10⁻⁹
CTNNA3	29119	A8K141	-1.5	1.3 × 10⁻³	1.0 × 10⁻²
FAM163A	148753	Q96GL9	-1.5	2.1 × 10⁻³	1.5 × 10⁻²
NELL1	4745	B3KXR2	-1.5	3.1 × 10⁻⁶	7.7 × 10⁻⁵
NR0B1	190	F1D8P4	-1.5	5.8 × 10⁻⁸	2.9 × 10⁻⁶
PRKG2	5593	B7ZA25	-1.5	5.1 × 10⁻⁹	3.6 × 10⁻⁷
FAM181B	220382	A6NEQ2	-1.5	5.9 × 10⁻⁶	1.4 × 10⁻⁴
SVEP1	79987	B3KQM1	-1.5	4.6 × 10⁻¹⁰	4.7 × 10⁻⁸
IRX6	79190	P78412	-1.5	1.5 × 10⁻⁵	2.9 × 10⁻⁴
HHIP-AS1	646576		-1.5	1.3 × 10⁻⁴	1.7 × 10⁻³
SHANK1	50944	Q9Y566	-1.4	7.9 × 10⁻⁵	1.1 × 10⁻³
IFIH1	64135	Q9BYX4	-1.4	1.9 × 10⁻⁴	2.3 × 10⁻³
FGFBP1	9982	Q14512	-1.4	1.4 × 10⁻³	1.1 × 10⁻²
VSNL1	7447	P62760	-1.4	4.5 × 10⁻⁷	1.5 × 10⁻⁵
NHSL2	340527	A0A0J9YY34	-1.4	1.0 × 10⁻⁵	2.1 × 10⁻⁴
TTPA	7274	P49638	-1.4	1.2 × 10⁻⁴	1.6 × 10⁻³
ENTREP1	9413	Q15884	-1.4	2.9 × 10⁻⁴	3.3 × 10⁻³
SLC9A2	6549	Q9UBY0	-1.4	1.0 × 10⁻⁹	9.1 × 10⁻⁸
STAC	6769	B4DR96	-1.4	5.7 × 10⁻⁹	4.0 × 10⁻⁷
WNT16	51384	E9PH60	-1.4	4.4 × 10⁻³	2.6 × 10⁻²
CYP2J2	1573	P51589	-1.4	2.9 × 10⁻⁸	1.6 × 10⁻⁶
C1orf229	388759	Q6ZS94	-1.4	3.0 × 10⁻³	1.9 × 10⁻²
TLL1	7092	O43897	-1.4	4.2 × 10⁻⁷	1.4 × 10⁻⁵
AMIGO2	347902	A0A024R127	-1.4	2.7 × 10⁻⁷	1.0 × 10⁻⁵
SYNPO2	171024	Q9UMS6	-1.4	7.6 × 10⁻³	3.8 × 10⁻²
NRG1	3084	A6MW56	-1.4	1.3 × 10⁻⁴	1.7 × 10⁻³
SAMD9	54809	Q5K651	-1.4	7.6 × 10⁻⁶	1.7 × 10⁻⁴
PHEX-AS1	100873942		-1.4	7.6 × 10⁻⁶	1.7 × 10⁻⁴
RGS4	5999	P49798	-1.4	5.1 × 10⁻⁵	8.0 × 10⁻⁴
OSR1	130497	Q8TAX0	-1.4	1.5 × 10⁻³	1.2 × 10⁻²
B3GNT7	93010	Q8NFL0	-1.3	5.4 × 10⁻³	3.0 × 10⁻²
SLC24A4	123041	Q8NFF2	-1.3	6.2 × 10⁻⁷	2.0 × 10⁻⁵
ADCYAP1R1	117	A0A090N8F8	-1.3	8.9 × 10⁻¹⁴	2.9 × 10⁻¹¹
STC1	6781	P52823	-1.3	2.1 × 10⁻⁴	2.5 × 10⁻³
IRF8	3394	Q02556	-1.3	3.3 × 10⁻⁹	2.5 × 10⁻⁷
SPOCK3	50859	Q9BQ16	-1.3	5.1 × 10⁻¹¹	7.5 × 10⁻⁹
SPOCK1	6695	Q08629	-1.3	2.3 × 10⁻³	1.6 × 10⁻²
PRR15	222171	A4D1A1	-1.3	1.2 × 10⁻³	9.9 × 10⁻³
CLMP	79827	B4E3S3	-1.3	2.1 × 10⁻⁹	1.7 × 10⁻⁷
SLC9A7P1	121456		-1.3	9.0 × 10⁻³	4.3 × 10⁻²
ABCB4	5244	P21439	-1.3	3.1 × 10⁻⁴	3.4 × 10⁻³
B3GALT1	8708	Q9Y5Z6	-1.3	7.7 × 10⁻⁵	1.1 × 10⁻³
RORB	6096	Q58EY0	-1.3	7.2 × 10⁻¹⁴	2.6 × 10⁻¹¹
COL21A1	81578	A0A158RFW1	-1.3	1.4 × 10⁻⁴	1.9 × 10⁻³
AK5	26289	Q9Y6K8	-1.3	1.0 × 10⁻⁴	1.4 × 10⁻³
PREX2	80243	Q70Z35	-1.3	4.3 × 10⁻¹⁴	1.8 × 10⁻¹¹
ANO4	121601	B7Z9Z0	-1.3	2.5 × 10⁻⁷	9.3 × 10⁻⁶
TCAF2	285966	A6NFQ2	-1.3	1.9 × 10⁻³	1.4 × 10⁻²
OSMR	9180	Q99650	-1.3	3.0 × 10⁻³	1.9 × 10⁻²
CHRDL1	91851	Q9BU40	-1.3	7.2 × 10⁻¹¹	9.8 × 10⁻⁹
SPON1	10418	Q9HCB6	-1.3	2.0 × 10⁻¹⁹	4.6 × 10⁻¹⁶
GPR85	54329	A4D0T8	-1.3	3.7 × 10⁻⁷	1.3 × 10⁻⁵
LGI2	55203	Q8N0V4	-1.3	1.3 × 10⁻¹⁵	7.6 × 10⁻¹³
LPL	4023	A0A1B1RVA9	-1.3	1.5 × 10⁻⁵	3.0 × 10⁻⁴
NFASC	23114	O94856	-1.3	3.1 × 10⁻⁵	5.3 × 10⁻⁴
TMEM108	66000	Q6UXF1	-1.3	1.5 × 10⁻⁸	9.7 × 10⁻⁷
SYNPO	11346	Q8N3V7	-1.3	1.7 × 10⁻³	1.3 × 10⁻²
HTR6	3362	P50406	-1.3	3.7 × 10⁻⁴	3.9 × 10⁻³
SYTL2	54843	Q9HCH5	-1.3	3.8 × 10⁻⁴	4.0 × 10⁻³
KDR	3791	A0A024RD88	-1.3	4.1 × 10⁻³	2.5 × 10⁻²
ABCC6P1	653190		-1.2	7.6 × 10⁻³	3.8 × 10⁻²
LRRN2	10446	A0A024R993	-1.2	6.3 × 10⁻⁸	3.1 × 10⁻⁶
XKRX	402415	Q6PP77	-1.2	9.9 × 10⁻³	4.6 × 10⁻²
MPPED1	758	O15442	-1.2	5.2 × 10⁻³	3.0 × 10⁻²
ETS1	2113	P14921	-1.2	2.2 × 10⁻¹³	6.2 × 10⁻¹¹
SFRP2	6423	A0A140VJU3	-1.2	1.8 × 10⁻⁹	1.5 × 10⁻⁷
ARNT2	9915	Q7Z3A3	-1.2	1.8 × 10⁻¹⁴	7.7 × 10⁻¹²
SNTG2	54221	Q9NY99	-1.2	2.7 × 10⁻³	1.8 × 10⁻²
PDE4B	5142	Q07343	-1.2	9.7 × 10⁻⁵	1.3 × 10⁻³
CD1D	912	P15813	-1.2	4.0 × 10⁻⁴	4.2 × 10⁻³
GNG2	54331	P59768	-1.2	1.5 × 10⁻⁹	1.2 × 10⁻⁷
PTPRB	5787	P23467	-1.2	2.5 × 10⁻³	1.7 × 10⁻²
PDE1B	5153	A0A024RB59	-1.2	2.0 × 10⁻⁷	7.8 × 10⁻⁶
IL18R1	8809	Q13478	-1.2	1.9 × 10⁻⁹	1.6 × 10⁻⁷
SERTM1	400120	A2A2V5	-1.2	3.3 × 10⁻⁶	8.2 × 10⁻⁵
TRPC4	7223	Q9UBN4	-1.2	9.5 × 10⁻³	4.5 × 10⁻²
CCNJL	79616	B4DZA8	-1.2	6.1 × 10⁻⁷	1.9 × 10⁻⁵
IGFBP6	3489	P24592	-1.2	1.1 × 10⁻²	4.9 × 10⁻²
PKIB	5570	Q9C010	-1.2	3.9 × 10⁻¹¹	5.8 × 10⁻⁹
PTGS2	5743	P35354	-1.2	6.8 × 10⁻⁴	6.2 × 10⁻³
ABCB1	5243	A4D1D2	-1.2	3.8 × 10⁻¹⁸	5.0 × 10⁻¹⁵
SYT2	127833	A0A024R9B3	-1.2	4.1 × 10⁻⁹	3.0 × 10⁻⁷
FBXL21P	26223	Q9UKT6	-1.2	1.7 × 10⁻⁷	6.9 × 10⁻⁶
PRR5L	79899	B3KNU3	-1.2	6.6 × 10⁻⁴	6.1 × 10⁻³
CERKL	375298	Q49MI3	-1.2	3.0 × 10⁻³	2.0 × 10⁻²
FRMPD3	84443	Q5JV73	-1.2	1.1 × 10⁻⁴	1.4 × 10⁻³
BMP3	651	P12645	-1.2	9.9 × 10⁻⁴	8.4 × 10⁻³
ZFR2	23217	Q9UPR6	-1.2	1.1 × 10⁻²	5.0 × 10⁻²
KCNS3	3790	Q9BQ31	-1.2	4.9 × 10⁻⁵	7.6 × 10⁻⁴
ALDH1A1	216	P00352	-1.2	1.8 × 10⁻⁴	2.2 × 10⁻³
TNFAIP8L3	388121	A0A1B0GTK8	-1.2	4.3 × 10⁻⁵	6.9 × 10⁻⁴
AARD	441376	B2RU19	-1.2	3.7 × 10⁻⁴	3.9 × 10⁻³
PAX7	5081	P23759	-1.2	7.2 × 10⁻⁵	1.1 × 10⁻³
FOLH1	2346	Q04609	-1.2	2.8 × 10⁻³	1.9 × 10⁻²
ADGRG6	57211	Q86SQ4	-1.2	6.2 × 10⁻¹²	1.2 × 10⁻⁹
MBP	4155	P02686	-1.1	4.4 × 10⁻⁶	1.0 × 10⁻⁴
RPRM	56475	Q9NS64	-1.1	7.0 × 10⁻⁵	1.0 × 10⁻³
SH3RF2	153769	Q08AM8	-1.1	8.8 × 10⁻³	4.3 × 10⁻²
SYT16	83851	Q17RD7	-1.1	5.1 × 10⁻⁴	5.1 × 10⁻³
TC2N	123036	Q8N9U0	-1.1	1.3 × 10⁻¹⁵	7.6 × 10⁻¹³
SRPX	8406	P78539	-1.1	2.5 × 10⁻⁹	2.0 × 10⁻⁷
RAB38	23682	A0A024R191	-1.1	2.9 × 10⁻⁷	1.1 × 10⁻⁵
TNS1	7145	B7Z6H8	-1.1	2.0 × 10⁻⁶	5.3 × 10⁻⁵
CAMK4	814	Q16566	-1.1	1.2 × 10⁻¹⁰	1.5 × 10⁻⁸
NALCN	259232	A0A024RE05	-1.1	4.5 × 10⁻³	2.7 × 10⁻²
PITX3	5309	O75364	-1.1	3.9 × 10⁻⁴	4.1 × 10⁻³
DCDC2	51473	Q9UHG0	-1.1	1.8 × 10⁻⁷	7.2 × 10⁻⁶
PPP1R1A	5502	Q13522	-1.1	5.5 × 10⁻⁸	2.8 × 10⁻⁶
AGTR1	185	P30556	-1.1	1.7 × 10⁻⁶	4.7 × 10⁻⁵
VWA5B2	90113	B4DF13	-1.1	5.5 × 10⁻⁴	5.3 × 10⁻³
SLIT3	6586	O75094	-1.1	3.4 × 10⁻⁵	5.6 × 10⁻⁴
AMPH	273	P49418	-1.1	3.5 × 10⁻⁹	2.7 × 10⁻⁷
TMEFF2	23671	Q9UIK5	-1.1	6.9 × 10⁻⁴	6.3 × 10⁻³
NAV2	89797	A7E2D6	-1.1	2.2 × 10⁻⁷	8.4 × 10⁻⁶
HHIP	64399	Q96QV1	-1.1	4.2 × 10⁻⁷	1.4 × 10⁻⁵
ZBTB7C	201501	A1YPR0	-1.1	1.3 × 10⁻⁵	2.6 × 10⁻⁴
MEGF10	84466	Q96KG7	-1.1	1.2 × 10⁻⁴	1.6 × 10⁻³
ANKRD20A5P	440482	A0PJZ0	-1.1	6.6 × 10⁻³	3.5 × 10⁻²
SLC22A4	6583	Q9H015	-1.1	6.2 × 10⁻³	3.3 × 10⁻²
RBM24	221662	Q9BX46	-1.1	1.1 × 10⁻⁴	1.5 × 10⁻³
ERAP2	64167	B2R769	-1.1	3.5 × 10⁻⁵	5.7 × 10⁻⁴
BEGAIN	57596	Q9BUH8	-1.1	7.1 × 10⁻⁴	6.5 × 10⁻³
MAOA	4128	P21397	-1.1	4.3 × 10⁻¹⁰	4.5 × 10⁻⁸
FERMT1	55612	Q49AC8	-1.1	1.5 × 10⁻⁹	1.2 × 10⁻⁷
DPP4	1803	P27487	-1.1	1.3 × 10⁻⁴	1.7 × 10⁻³
APLN	8862	Q9ULZ1	-1.1	4.7 × 10⁻⁶	1.1 × 10⁻⁴
ITGA9	3680	Q13797	-1.1	2.0 × 10⁻⁴	2.4 × 10⁻³
SYT9	143425	Q86SS6	-1.1	7.5 × 10⁻⁶	1.7 × 10⁻⁴
EFEMP1	2202	A0A0S2Z4F1	-1.1	2.2 × 10⁻¹¹	3.5 × 10⁻⁹
FAM174B	400451	Q3ZCQ3	-1.1	1.3 × 10⁻⁵	2.6 × 10⁻⁴
IGSF9	57549	Q9P2J2	-1.1	2.1 × 10⁻⁴	2.5 × 10⁻³
TOX	9760	O94900	-1.1	3.5 × 10⁻³	2.2 × 10⁻²
SYT14	255928	A1L3Y1	-1.1	3.8 × 10⁻⁸	2.1 × 10⁻⁶
KIAA0040	9674	J3QR46	-1.1	8.2 × 10⁻¹⁴	2.8 × 10⁻¹¹
OLFML2B	25903	B4DWE8	-1.1	1.7 × 10⁻³	1.3 × 10⁻²
CRACDL	343990	Q6NV74	-1.1	3.6 × 10⁻⁴	3.9 × 10⁻³
GALNT5	11227	Q7Z7M9	-1.1	1.1 × 10⁻²	4.9 × 10⁻²
MIR7161	102465694		-1.1	2.9 × 10⁻³	1.9 × 10⁻²
BICC1	80114	Q9H694	-1.1	6.3 × 10⁻¹⁴	2.4 × 10⁻¹¹
CNKSR2	22866	Q8WXI2	-1.1	3.5 × 10⁻⁴	3.8 × 10⁻³
SNCB	6620	Q16143	-1.1	2.4 × 10⁻⁶	6.3 × 10⁻⁵
ADAMTSL3	57188	P82987	-1.1	9.9 × 10⁻⁴	8.4 × 10⁻³
RNF182	221687	A0A024QZW5	-1.1	5.8 × 10⁻¹²	1.1 × 10⁻⁹
EPHB6	2051	J3KQU5	-1.1	1.7 × 10⁻³	1.3 × 10⁻²
EPHA10	284656	Q4G0R4	-1.1	8.1 × 10⁻⁴	7.2 × 10⁻³
THSD1	55901	A0A024R064	-1.0	1.1 × 10⁻⁵	2.2 × 10⁻⁴
GNG11	2791	P61952	-1.0	9.2 × 10⁻⁶	1.9 × 10⁻⁴
RASGRP3	25780	Q8IV61	-1.0	6.6 × 10⁻³	3.5 × 10⁻²
C11orf65	160140	Q8NCR3	-1.0	4.7 × 10⁻³	2.8 × 10⁻²
ILDR2	387597	Q71H61	-1.0	5.2 × 10⁻¹⁵	2.7 × 10⁻¹²
ZNF467	168544	C9JAX3	-1.0	2.4 × 10⁻⁵	4.2 × 10⁻⁴
LINC00693	645206		-1.0	1.1 × 10⁻⁶	3.2 × 10⁻⁵
EDNRB	1910	P24530	-1.0	5.5 × 10⁻¹⁰	5.3 × 10⁻⁸
LRAT	9227	O95237	-1.0	2.1 × 10⁻³	1.5 × 10⁻²
NEFM	4741	Q9UK51	-1.0	1.8 × 10⁻⁷	7.1 × 10⁻⁶
CSGALNACT1	55790	Q8TDX6	-1.0	7.0 × 10⁻³	3.6 × 10⁻²
ABCC8	6833	Q09428	-1.0	6.9 × 10⁻³	3.6 × 10⁻²
RAB3IL1	5866	Q8TBN0	-1.0	1.2 × 10⁻⁵	2.4 × 10⁻⁴
EGFLAM	133584	Q63HQ2	-1.0	1.1 × 10⁻⁴	1.5 × 10⁻³
HTR7	3363	P34969	-1.0	2.9 × 10⁻³	1.9 × 10⁻²
CDH7	1005	F5H5X9	-1.0	2.7 × 10⁻⁶	6.8 × 10⁻⁵
KCNA3	3738	P22001	-1.0	7.9 × 10⁻⁶	1.7 × 10⁻⁴
CRYM	1428	Q14894	-1.0	4.7 × 10⁻³	2.7 × 10⁻²
CYRIA	81553	Q9H0Q0	-1.0	9.0 × 10⁻³	4.4 × 10⁻²
TAL1	6886	P17542	-1.0	1.3 × 10⁻⁴	1.7 × 10⁻³
TRPA1	8989	O75762	-1.0	8.0 × 10⁻⁵	1.1 × 10⁻³
CSNK1E	1454	P49674	-1.0	1.5 × 10⁻¹¹	2.4 × 10⁻⁹
ITIH5	80760	G5E9D8	-1.0	6.8 × 10⁻³	3.6 × 10⁻²
ANKRD34B	340120	A5PLL1	-1.0	4.5 × 10⁻⁷	1.5 × 10⁻⁵
LINC01145	103091866		-1.0	3.2 × 10⁻³	2.1 × 10⁻²
C1QTNF1	114897	Q9BXJ1	-1.0	1.4 × 10⁻³	1.1 × 10⁻²
DDX60	55601	Q6B0F7	-1.0	1.2 × 10⁻⁴	1.6 × 10⁻³
NDST4	64579	A8K0V5	-1.0	5.4 × 10⁻³	3.0 × 10⁻²
RUBCNL	80183	Q9H714	-1.0	1.3 × 10⁻⁴	1.7 × 10⁻³
BTNL9	153579	Q6UXG8	-1.0	2.1 × 10⁻⁸	1.2 × 10⁻⁶
TSPAN11	441631	A1L157	-1.0	1.1 × 10⁻³	9.1 × 10⁻³
S1PR1	1901	P21453	-1.0	2.6 × 10⁻⁶	6.7 × 10⁻⁵
GALNT14	79623	Q96FL9	-1.0	3.6 × 10⁻¹⁰	3.9 × 10⁻⁸
NHS	4810	Q6T4R5	-1.0	2.1 × 10⁻⁷	8.1 × 10⁻⁶
TSLP	85480	Q969D9	-1.0	1.3 × 10⁻⁴	1.7 × 10⁻³
PLCB2	5330	Q00722	-1.0	3.6 × 10⁻³	2.2 × 10⁻²
VSTM4	196740	Q8IW00	-1.0	7.3 × 10⁻⁷	2.3 × 10⁻⁵
FIBIN	387758	Q8TAL6	-1.0	9.5 × 10⁻³	4.5 × 10⁻²
SLC16A7	9194	A0A024RBB2	-1.0	1.3 × 10⁻⁹	1.1 × 10⁻⁷
TMEM229A	730130	B2RXF0	-1.0	6.1 × 10⁻³	3.3 × 10⁻²
AQP3	360	Q92482	-0.9	3.0 × 10⁻³	2.0 × 10⁻²
DSEL	92126	Q8IZU8	-0.9	1.6 × 10⁻⁷	6.5 × 10⁻⁶
DTX4	23220	Q9Y2E6	-0.9	2.6 × 10⁻³	1.8 × 10⁻²
BEX1	55859	Q9HBH7	-0.9	1.1 × 10⁻¹³	3.3 × 10⁻¹¹
HDAC9	9734	Q9UKV0	-0.9	5.4 × 10⁻⁴	5.2 × 10⁻³
DNAH6	1768	Q9C0G6	-0.9	4.0 × 10⁻³	2.4 × 10⁻²
DCHS1	8642	Q96JQ0	-0.9	2.5 × 10⁻⁶	6.5 × 10⁻⁵
KIF26B	55083	Q2KJY2	-0.9	4.4 × 10⁻⁴	4.4 × 10⁻³
IL1R1	3554	P14778	-0.9	3.2 × 10⁻³	2.1 × 10⁻²
LYPD6B	130576	Q8NI32	-0.9	3.8 × 10⁻³	2.3 × 10⁻²
GFRA1	2674	P56159	-0.9	2.5 × 10⁻¹⁰	2.9 × 10⁻⁸
PPP1R16B	26051	Q96T49	-0.9	5.4 × 10⁻⁸	2.8 × 10⁻⁶
PRICKLE2	166336	A0A024R368	-0.9	2.5 × 10⁻⁴	2.9 × 10⁻³
RUNX3	864	A0A024RAH4	-0.9	1.3 × 10⁻³	1.0 × 10⁻²
NR5A2	2494	O00482	-0.9	2.7 × 10⁻⁶	6.9 × 10⁻⁵
ATOH8	84913	Q96SQ7	-0.9	5.3 × 10⁻³	3.0 × 10⁻²
FBLN5	10516	A0A024R6G3	-0.9	4.3 × 10⁻⁸	2.3 × 10⁻⁶
CRYBG1	202	Q9Y4K1	-0.9	8.9 × 10⁻⁴	7.8 × 10⁻³
GDF6	392255	A0A0S2A5D6	-0.9	2.1 × 10⁻⁵	3.8 × 10⁻⁴
UGT3A2	167127	Q3SY77	-0.9	6.6 × 10⁻⁶	1.5 × 10⁻⁴
HMGCLL1	54511	O95896	-0.9	8.8 × 10⁻³	4.3 × 10⁻²
LYSMD2	256586	Q8IV50	-0.9	1.6 × 10⁻⁵	3.0 × 10⁻⁴
PLA2G7	7941	Q13093	-0.9	1.2 × 10⁻³	9.8 × 10⁻³
OLFM2	93145	O95897	-0.9	1.4 × 10⁻³	1.1 × 10⁻²
LAMC2	3918	Q13753	-0.9	6.3 × 10⁻³	3.4 × 10⁻²
RAB39B	116442	Q96DA2	-0.9	1.7 × 10⁻⁶	4.7 × 10⁻⁵
RASAL1	8437	O95294	-0.9	2.3 × 10⁻⁴	2.7 × 10⁻³
ISM1	140862	B1AKI9	-0.9	5.1 × 10⁻³	2.9 × 10⁻²
ZFHX2	85446	B7ZM83	-0.9	1.8 × 10⁻³	1.4 × 10⁻²
TFPI2	7980	P48307	-0.9	3.8 × 10⁻³	2.4 × 10⁻²
SAMD5	389432	Q5TGI4	-0.9	9.8 × 10⁻¹³	2.4 × 10⁻¹⁰
TMEM132E	124842	A0A0J9YW40	-0.9	1.5 × 10⁻¹²	3.6 × 10⁻¹⁰
CNTN1	1272	Q12860	-0.9	7.3 × 10⁻¹⁵	3.5 × 10⁻¹²
DPYSL3	1809	A0A140VK07	-0.9	1.5 × 10⁻²³	4.6 × 10⁻²⁰
NTN4	59277	A8K3H6	-0.9	2.1 × 10⁻⁷	8.0 × 10⁻⁶
SGPP2	130367	Q8IWX5	-0.9	3.9 × 10⁻³	2.4 × 10⁻²
TMEM150C	441027	B9EJG8	-0.9	2.3 × 10⁻⁵	4.1 × 10⁻⁴
CNTFR	1271	P26992	-0.9	7.0 × 10⁻⁵	1.0 × 10⁻³
ZNF385B	151126	Q569K4	-0.9	7.8 × 10⁻⁵	1.1 × 10⁻³
CSF1	1435	A0A024R0A1	-0.9	9.4 × 10⁻⁸	4.3 × 10⁻⁶
ADORA1	134	P30542	-0.9	8.3 × 10⁻⁴	7.3 × 10⁻³
TOX3	27324	O15405	-0.9	5.8 × 10⁻⁶	1.3 × 10⁻⁴
NCALD	83988	B2RB70	-0.9	3.4 × 10⁻⁵	5.7 × 10⁻⁴
STXBP5L	9515	B4DKF6	-0.9	5.5 × 10⁻⁶	1.3 × 10⁻⁴
MCTP1	79772	Q6DN14	-0.9	4.4 × 10⁻⁴	4.4 × 10⁻³
DPYD	1806	Q12882	-0.9	1.2 × 10⁻⁴	1.6 × 10⁻³
RFTN1	23180	Q14699	-0.9	1.5 × 10⁻⁷	6.4 × 10⁻⁶
NPTXR	23467	O95502	-0.9	3.5 × 10⁻⁵	5.8 × 10⁻⁴
SCUBE1	80274	A0JP65	-0.9	1.0 × 10⁻²	4.7 × 10⁻²
SPRY3	10251	O43610	-0.9	3.5 × 10⁻³	2.2 × 10⁻²
APBA1	320	Q02410	-0.9	3.2 × 10⁻⁴	3.5 × 10⁻³
SQOR	58472	Q9Y6N5	-0.9	3.2 × 10⁻³	2.0 × 10⁻²
UBE2QL1	134111	A1L167	-0.9	2.3 × 10⁻⁶	6.2 × 10⁻⁵
NMNAT3	349565	Q49AL4	-0.9	5.3 × 10⁻³	3.0 × 10⁻²
NEFL	4747	P07196	-0.9	1.7 × 10⁻²⁶	7.9 × 10⁻²³
ARFGEF3	57221	Q5TH69	-0.9	1.7 × 10⁻¹⁶	1.5 × 10⁻¹³
SYT13	57586	Q7L8C5	-0.9	1.9 × 10⁻³	1.4 × 10⁻²
GEM	2669	A0A024R9F5	-0.9	9.5 × 10⁻⁵	1.3 × 10⁻³
BARX2	8538	Q9UMQ3	-0.9	1.9 × 10⁻¹⁰	2.3 × 10⁻⁸
SYT6	148281	I6L9C3	-0.9	2.8 × 10⁻³	1.8 × 10⁻²
TBC1D30	23329	Q9Y2I9	-0.9	7.8 × 10⁻¹⁰	7.3 × 10⁻⁸
LBH	81606	Q53QV2	-0.9	1.7 × 10⁻⁵	3.3 × 10⁻⁴
MAPK4	5596	B4DEW2	-0.9	3.1 × 10⁻⁵	5.3 × 10⁻⁴
RAB27B	5874	O00194	-0.8	1.9 × 10⁻⁴	2.3 × 10⁻³
KSR2	283455	E9PB13	-0.8	1.8 × 10⁻³	1.4 × 10⁻²
KLK8	11202	A0A0A0MQY9	-0.8	4.4 × 10⁻³	2.6 × 10⁻²
SLC4A3	6508	P48751	-0.8	2.7 × 10⁻⁴	3.0 × 10⁻³
NRG2	9542	F5GZS7	-0.8	2.0 × 10⁻⁶	5.4 × 10⁻⁵
EPHB1	2047	P54762	-0.8	4.6 × 10⁻³	2.7 × 10⁻²
SNCAIP	9627	Q9Y6H5	-0.8	2.2 × 10⁻³	1.6 × 10⁻²
KIAA1217	56243	Q5T5P2	-0.8	2.4 × 10⁻⁴	2.8 × 10⁻³
ARHGAP20	57569	Q9P2F6	-0.8	1.7 × 10⁻⁸	1.1 × 10⁻⁶
GPC5	2262	P78333	-0.8	2.5 × 10⁻⁵	4.4 × 10⁻⁴
DACH2	117154	A8K3I1	-0.8	3.9 × 10⁻⁵	6.3 × 10⁻⁴
VDR	7421	F1D8P8	-0.8	8.9 × 10⁻¹⁰	8.0 × 10⁻⁸
CHRM3	1131	A0A024R3S2	-0.8	1.9 × 10⁻³	1.4 × 10⁻²
PALM2	114299	Q8IXS6	-0.8	8.1 × 10⁻⁵	1.1 × 10⁻³
ITGA4	3676	P13612	-0.8	1.5 × 10⁻¹²	3.6 × 10⁻¹⁰
ADAMTS20	80070	P59510	-0.8	4.9 × 10⁻⁵	7.7 × 10⁻⁴
DYNC1I1	1780	A4D1I7	-0.8	3.9 × 10⁻³	2.4 × 10⁻²
ETNPPL	64850	Q8TBG4	-0.8	4.3 × 10⁻³	2.6 × 10⁻²
SHISAL1	85352	Q3SXP7	-0.8	1.5 × 10⁻¹¹	2.4 × 10⁻⁹
CD40	958	A0A0S2Z3C7	-0.8	5.0 × 10⁻³	2.9 × 10⁻²
SPINT1	6692	O43278	-0.8	6.4 × 10⁻³	3.4 × 10⁻²
KIAA1549L	25758	Q12914	-0.8	1.1 × 10⁻⁶	3.3 × 10⁻⁵
MGLL	11343	Q99685	-0.8	7.6 × 10⁻⁴	6.8 × 10⁻³
GMPR	2766	P36959	-0.8	3.0 × 10⁻⁵	5.1 × 10⁻⁴
PRKCB	5579	P05771	-0.8	9.4 × 10⁻⁸	4.3 × 10⁻⁶
GRIK4	2900	B2RAP6	-0.8	8.6 × 10⁻³	4.2 × 10⁻²
GABRD	2563	A8K496	-0.8	6.3 × 10⁻³	3.4 × 10⁻²
DMRT3	58524	Q9NQL9	-0.8	3.0 × 10⁻³	2.0 × 10⁻²
CDO1	1036	Q16878	-0.8	1.6 × 10⁻⁸	1.0 × 10⁻⁶
STUM	375057	Q69YW2	-0.8	2.5 × 10⁻⁴	2.9 × 10⁻³
SYPL2	284612	Q5VXT5	-0.8	4.2 × 10⁻⁸	2.3 × 10⁻⁶
GASK1A	729085	Q9UFP1	-0.8	1.2 × 10⁻⁶	3.3 × 10⁻⁵
PRIMA1	145270	A0A024R6J9	-0.8	4.4 × 10⁻³	2.6 × 10⁻²
SLC30A10	55532	B3KR19	-0.8	1.3 × 10⁻³	1.0 × 10⁻²
ELFN2	114794	Q5R3F8	-0.8	4.6 × 10⁻³	2.7 × 10⁻²
RNF144B	255488	Q7Z419	-0.8	6.0 × 10⁻⁷	1.9 × 10⁻⁵
RAB6D	150786	Q53S08	-0.8	1.9 × 10⁻³	1.4 × 10⁻²
RASGRF2	5924	O14827	-0.8	4.2 × 10⁻⁹	3.1 × 10⁻⁷
SHISA3	152573	A0PJX4	-0.8	3.7 × 10⁻⁵	6.0 × 10⁻⁴
LMO2	4005	P25791	-0.8	9.7 × 10⁻³	4.6 × 10⁻²
GALNT3	2591	Q14435	-0.8	5.9 × 10⁻⁶	1.3 × 10⁻⁴
POU3F1	5453	Q03052	-0.8	1.3 × 10⁻³	1.0 × 10⁻²
ACSS1	84532	Q9NUB1	-0.8	1.9 × 10⁻¹²	4.3 × 10⁻¹⁰
C3orf80	401097	F5H4A9	-0.8	1.9 × 10⁻⁶	5.1 × 10⁻⁵
LRRTM2	26045	O43300	-0.8	9.7 × 10⁻³	4.6 × 10⁻²
PNMA3	29944	Q9UL41	-0.8	1.9 × 10⁻⁵	3.5 × 10⁻⁴
PPFIBP2	8495	Q8ND30	-0.8	1.1 × 10⁻⁴	1.5 × 10⁻³
COL19A1	1310	Q14993	-0.8	1.1 × 10⁻³	8.8 × 10⁻³
SYNE3	161176	Q6ZMZ3	-0.8	9.2 × 10⁻⁶	2.0 × 10⁻⁴
EGFR	1956	Q504U8	-0.8	2.5 × 10⁻⁸	1.5 × 10⁻⁶
ABTB3	121551	A6QL63	-0.8	9.2 × 10⁻¹³	2.3 × 10⁻¹⁰
GABBR2	9568	H9NIL8	-0.8	4.1 × 10⁻³	2.5 × 10⁻²
FLVCR2	55640	Q9UPI3	-0.8	1.3 × 10⁻³	1.0 × 10⁻²
OTUD7A	161725	Q8TE49	-0.8	9.6 × 10⁻⁴	8.2 × 10⁻³
SERINC2	347735	Q96IM8	-0.8	5.5 × 10⁻⁷	1.8 × 10⁻⁵
FAM124A	220108	Q86V42	-0.8	7.6 × 10⁻⁵	1.1 × 10⁻³
MMP2	4313	P08253	-0.8	2.5 × 10⁻³	1.7 × 10⁻²
MYO5B	4645	Q7Z7A5	-0.8	1.3 × 10⁻⁷	5.6 × 10⁻⁶
MARVELD3	91862	Q96A59	-0.8	2.5 × 10⁻³	1.7 × 10⁻²
EPHA8	2046	P29322	-0.8	4.4 × 10⁻¹⁰	4.5 × 10⁻⁸
SOX5	6660	P35711	-0.8	2.7 × 10⁻⁶	6.8 × 10⁻⁵
CDHR1	92211	F1T0L2	-0.8	2.0 × 10⁻⁵	3.6 × 10⁻⁴
HS6ST3	266722	Q8IZP7	-0.8	1.9 × 10⁻⁷	7.6 × 10⁻⁶
CAMK2N1	55450	Q7Z7J9	-0.8	4.2 × 10⁻⁶	1.0 × 10⁻⁴
FGF12	2257	P61328	-0.8	1.1 × 10⁻³	8.8 × 10⁻³
ZCCHC12	170261	Q6PEW1	-0.8	3.8 × 10⁻¹³	1.0 × 10⁻¹⁰
PWWP3B	139221	Q5H9M0	-0.8	1.8 × 10⁻¹⁰	2.2 × 10⁻⁸
NXPH4	11247	O95158	-0.8	4.0 × 10⁻⁸	2.2 × 10⁻⁶
HPGD	3248	P15428	-0.8	6.0 × 10⁻⁵	9.0 × 10⁻⁴
WNT11	7481	O96014	-0.8	1.8 × 10⁻⁶	5.0 × 10⁻⁵
CCBE1	147372	Q6UXH8	-0.8	3.5 × 10⁻³	2.2 × 10⁻²
GLIS3	169792	Q1PHJ8	-0.8	7.0 × 10⁻³	3.6 × 10⁻²
QRFPR	84109	Q96P65	-0.8	2.8 × 10⁻⁸	1.6 × 10⁻⁶
MDGA2	161357	Q7Z553	-0.8	5.4 × 10⁻⁷	1.8 × 10⁻⁵
HLA-DOA	3111	A0A1V0E3M7	-0.8	1.9 × 10⁻⁵	3.5 × 10⁻⁴
ESX1	80712	Q8N693	-0.8	1.2 × 10⁻³	9.7 × 10⁻³
ADAMTS2	9509	O95450	-0.8	1.2 × 10⁻⁷	5.3 × 10⁻⁶
IGSF1	3547	Q8N6C5	-0.8	2.7 × 10⁻⁴	3.1 × 10⁻³
EBF1	1879	B4E2U8	-0.8	6.2 × 10⁻³	3.3 × 10⁻²
ST8SIA4	7903	Q92187	-0.8	2.8 × 10⁻⁶	7.0 × 10⁻⁵
CNTNAP2	26047	A0A090N7T7	-0.8	9.4 × 10⁻¹⁷	9.6 × 10⁻¹⁴
ACSL6	23305	Q9UKU0	-0.8	1.2 × 10⁻⁵	2.5 × 10⁻⁴
KCNN3	3782	A0A087WYJ0	-0.7	3.0 × 10⁻³	2.0 × 10⁻²
LZTS1	11178	Q9Y250	-0.7	9.3 × 10⁻⁴	8.1 × 10⁻³
MMP17	4326	Q9ULZ9	-0.7	6.9 × 10⁻⁴	6.3 × 10⁻³
FNDC5	252995	Q8NAU1	-0.7	4.3 × 10⁻³	2.6 × 10⁻²
LRRC4B	94030	A0A024R4I8	-0.7	9.1 × 10⁻⁶	1.9 × 10⁻⁴
LEPR	3953	P48357	-0.7	2.6 × 10⁻¹²	5.5 × 10⁻¹⁰
EPDR1	54749	Q96J80	-0.7	1.7 × 10⁻⁹	1.4 × 10⁻⁷
PTCHD1	139411	Q96NR3	-0.7	5.1 × 10⁻³	2.9 × 10⁻²
TMEM200C	645369	A6NKL6	-0.7	3.6 × 10⁻³	2.3 × 10⁻²
FSTL5	56884	Q8N475	-0.7	9.1 × 10⁻⁴	7.9 × 10⁻³
ACADL	33	P28330	-0.7	7.6 × 10⁻⁶	1.7 × 10⁻⁴
INSM1	3642	Q01101	-0.7	1.3 × 10⁻⁵	2.7 × 10⁻⁴
RERG	85004	Q96A58	-0.7	2.1 × 10⁻⁵	3.8 × 10⁻⁴
DOK6	220164	Q6PKX4	-0.7	6.4 × 10⁻⁶	1.5 × 10⁻⁴
FAM13C	220965	A8K181	-0.7	1.1 × 10⁻²	4.9 × 10⁻²
EYA2	2139	O00167	-0.7	2.5 × 10⁻⁸	1.5 × 10⁻⁶
CDYL2	124359	Q8N8U2	-0.7	2.1 × 10⁻⁵	3.8 × 10⁻⁴
SLC22A15	55356	Q8IZD6	-0.7	1.9 × 10⁻⁴	2.3 × 10⁻³
ABCG1	9619	P45844	-0.7	3.0 × 10⁻³	1.9 × 10⁻²
GIPC3	126326	Q8TF64	-0.7	5.6 × 10⁻⁴	5.4 × 10⁻³
KRT222	125113	Q8N1A0	-0.7	2.0 × 10⁻⁵	3.6 × 10⁻⁴
TMEM63C	57156	A0A024R6B3	-0.7	5.6 × 10⁻⁴	5.4 × 10⁻³
IKZF3	22806	Q9UKT9	-0.7	2.6 × 10⁻⁸	1.5 × 10⁻⁶
SCARA3	51435	Q6AZY7	-0.7	2.2 × 10⁻⁵	4.0 × 10⁻⁴
RBFOX3	146713	A6NFN3	-0.7	7.3 × 10⁻³	3.7 × 10⁻²
SLC9A9	285195	Q8IVB4	-0.7	1.8 × 10⁻³	1.3 × 10⁻²
ACVR1C	130399	Q8NER5	-0.7	7.7 × 10⁻⁶	1.7 × 10⁻⁴
SLC1A1	6505	P43005	-0.7	3.1 × 10⁻¹⁰	3.4 × 10⁻⁸
C2orf72	257407	A6NCS6	-0.7	1.3 × 10⁻⁵	2.6 × 10⁻⁴
SERPINB9	5272	A0A024QZT4	-0.7	6.7 × 10⁻⁶	1.5 × 10⁻⁴
IL12RB2	3595	B4DGA4	-0.7	1.1 × 10⁻⁶	3.3 × 10⁻⁵
COLGALT2	23127	B4DF84	-0.7	3.6 × 10⁻⁷	1.3 × 10⁻⁵
TSPAN2	10100	B1AKP1	-0.7	3.3 × 10⁻⁵	5.5 × 10⁻⁴
SETBP1	26040	Q9Y6X0	-0.7	1.6 × 10⁻⁵	3.0 × 10⁻⁴
DAB2	1601	P98082	-0.7	2.0 × 10⁻⁸	1.2 × 10⁻⁶
CR2	1380	P20023	-0.7	4.5 × 10⁻³	2.6 × 10⁻²
TFCP2L1	29842	Q9NZI6	-0.7	2.8 × 10⁻⁷	1.0 × 10⁻⁵
LINC01351	101929120		-0.7	9.5 × 10⁻³	4.5 × 10⁻²
PHOSPHO1	162466	Q8TCT1	-0.7	1.3 × 10⁻³	1.0 × 10⁻²
EPAS1	2034	B3KW07	-0.7	4.7 × 10⁻¹⁴	1.9 × 10⁻¹¹
CELF5	60680	Q8N6W0	-0.7	4.5 × 10⁻³	2.6 × 10⁻²
NEURL1B	54492	A8MQ27	-0.7	3.2 × 10⁻⁶	7.9 × 10⁻⁵
BEND6	221336	Q5SZJ8	-0.7	1.7 × 10⁻³	1.3 × 10⁻²
SNTB1	6641	Q13884	-0.7	6.1 × 10⁻¹¹	8.4 × 10⁻⁹
CEBPD	1052	P49716	-0.7	1.8 × 10⁻⁵	3.4 × 10⁻⁴
EMX1	2016	Q04741	-0.7	3.2 × 10⁻⁵	5.4 × 10⁻⁴
FZD10	11211	Q6NSL8	-0.7	3.8 × 10⁻⁶	9.2 × 10⁻⁵
JPH3	57338	F8W9A3	-0.7	1.2 × 10⁻⁹	1.0 × 10⁻⁷
DUSP4	1846	Q13115	-0.7	9.5 × 10⁻⁵	1.3 × 10⁻³
LAYN	143903	Q6UX15	-0.7	4.2 × 10⁻¹¹	6.2 × 10⁻⁹
SOX21	11166	Q9Y651	-0.7	1.8 × 10⁻¹⁰	2.3 × 10⁻⁸
TRIM58	25893	Q8NG06	-0.7	1.1 × 10⁻⁶	3.3 × 10⁻⁵
GPRC5C	55890	A0A024R8N9	-0.7	1.5 × 10⁻⁴	1.9 × 10⁻³
NELL2	4753	B7Z625	-0.7	6.2 × 10⁻¹²	1.2 × 10⁻⁹
TMEM74B	55321	Q9NUR3	-0.7	1.8 × 10⁻⁴	2.2 × 10⁻³
MYT1	4661	Q01538	-0.7	5.5 × 10⁻⁴	5.3 × 10⁻³
PPARGC1A	10891	Q9UBK2	-0.7	8.1 × 10⁻⁶	1.7 × 10⁻⁴
TMEM54	113452	Q969K7	-0.7	1.6 × 10⁻⁶	4.5 × 10⁻⁵
ADRB1	153	P08588	-0.7	7.1 × 10⁻³	3.7 × 10⁻²
SFRP1	6422	Q8N474	-0.7	3.0 × 10⁻¹⁰	3.4 × 10⁻⁸
ELMO1	9844	Q92556	-0.7	2.2 × 10⁻³	1.6 × 10⁻²
TRAF5	7188	O00463	-0.7	4.6 × 10⁻⁷	1.5 × 10⁻⁵
FEZ1	9638	Q99689	-0.7	3.4 × 10⁻⁴	3.6 × 10⁻³
MEGF6	1953	O75095	-0.7	2.3 × 10⁻⁵	4.1 × 10⁻⁴
NIBAN1	116496	Q9BZQ8	-0.7	5.2 × 10⁻⁸	2.7 × 10⁻⁶
NEXMIF	340533	Q5QGS0	-0.7	5.6 × 10⁻³	3.1 × 10⁻²
PDZD4	57595	Q17RL8	-0.7	1.4 × 10⁻⁶	3.9 × 10⁻⁵
CD109	135228	Q6YHK3	-0.7	3.1 × 10⁻⁸	1.7 × 10⁻⁶
SYT17	51760	H3BN78	-0.7	7.6 × 10⁻³	3.8 × 10⁻²
SORL1	6653	A0A024R3H2	-0.7	1.5 × 10⁻¹³	4.5 × 10⁻¹¹
ESRRG	2104	F1D8R6	-0.7	6.4 × 10⁻¹⁰	6.2 × 10⁻⁸
SYT7	9066	O43581	-0.7	2.7 × 10⁻⁵	4.6 × 10⁻⁴
C3orf70	285382	A6NLC5	-0.7	2.0 × 10⁻⁵	3.7 × 10⁻⁴
PGBD5	79605	Q8N414	-0.7	9.3 × 10⁻¹¹	1.2 × 10⁻⁸
FLI1	2313	A0A024R3N6	-0.7	5.2 × 10⁻⁵	8.0 × 10⁻⁴
N4BP3	23138	O15049	-0.7	2.5 × 10⁻⁵	4.4 × 10⁻⁴
PLK2	10769	A0A087WUH9	-0.7	5.2 × 10⁻⁷	1.7 × 10⁻⁵
HLA-DMB	3109	A0A1V0E3P2	-0.7	2.7 × 10⁻⁴	3.1 × 10⁻³
PSD4	23550	Q8NDX1	-0.7	6.6 × 10⁻³	3.5 × 10⁻²
BOC	91653	Q9BWV1	-0.7	6.5 × 10⁻⁷	2.1 × 10⁻⁵
GPR37	2861	O15354	-0.7	3.8 × 10⁻⁶	9.2 × 10⁻⁵
MYOM2	9172	P54296	-0.7	4.4 × 10⁻⁸	2.3 × 10⁻⁶
TRIB2	28951	Q92519	-0.7	1.9 × 10⁻¹¹	3.1 × 10⁻⁹
DDIT4L	115265	Q96D03	-0.7	1.2 × 10⁻³	9.6 × 10⁻³
EBF4	57593	E9PEI2	-0.7	4.0 × 10⁻⁴	4.2 × 10⁻³
RTN1	6252	Q16799	-0.7	6.1 × 10⁻⁵	9.1 × 10⁻⁴
JAKMIP2	9832	Q96AA8	-0.7	8.9 × 10⁻¹⁰	8.0 × 10⁻⁸
DUSP5	1847	Q16690	-0.7	6.3 × 10⁻⁵	9.4 × 10⁻⁴
KIF5C	3800	O60282	-0.7	9.0 × 10⁻⁸	4.2 × 10⁻⁶
ARAP3	64411	Q05CH1	-0.7	5.1 × 10⁻³	2.9 × 10⁻²
TMOD2	29767	Q9NZR1	-0.7	3.6 × 10⁻¹¹	5.6 × 10⁻⁹
KCNK1	3775	A0A024R3T2	-0.7	1.8 × 10⁻⁵	3.4 × 10⁻⁴
ARSJ	79642	Q5FYB0	-0.7	8.4 × 10⁻⁷	2.6 × 10⁻⁵
SAMD12	401474	B8ZZB7	-0.7	1.3 × 10⁻⁶	3.7 × 10⁻⁵
TMEM158	25907	Q8WZ71	-0.7	9.1 × 10⁻⁷	2.8 × 10⁻⁵
NKD1	85407	Q969G9	-0.6	1.5 × 10⁻⁷	6.4 × 10⁻⁶
SEPTIN3	55964	Q9UH03	-0.6	2.5 × 10⁻⁸	1.5 × 10⁻⁶
SRRM3	222183	A0A087WXA3	-0.6	3.8 × 10⁻⁴	4.0 × 10⁻³
C2orf88	84281	Q9BSF0	-0.6	1.1 × 10⁻³	8.8 × 10⁻³
IGFBP2	3485	P18065	-0.6	4.1 × 10⁻¹⁹	7.5 × 10⁻¹⁶
CHST9	83539	Q7L1S5	-0.6	8.9 × 10⁻³	4.3 × 10⁻²
ATP1A3	478	P13637	-0.6	1.1 × 10⁻⁷	5.0 × 10⁻⁶
PAQR9	344838	Q6ZVX9	-0.6	4.3 × 10⁻³	2.6 × 10⁻²
SYNDIG1	79953	Q9H7V2	-0.6	3.4 × 10⁻⁴	3.7 × 10⁻³
PDZRN3	23024	Q9UPQ7	-0.6	5.5 × 10⁻¹¹	8.0 × 10⁻⁹
LPAR1	1902	Q5VZX0	-0.6	3.3 × 10⁻⁷	1.2 × 10⁻⁵
LGALS3	3958	A0A024R693	-0.6	5.4 × 10⁻⁴	5.2 × 10⁻³
CELF4	56853	Q9BZC1	-0.6	6.0 × 10⁻³	3.2 × 10⁻²
ITGB8	3696	P26012	-0.6	6.6 × 10⁻³	3.5 × 10⁻²
KCTD12	115207	A0A140VJM4	-0.6	1.6 × 10⁻²⁷	1.5 × 10⁻²³
SPATA6	54558	Q9NWH7	-0.6	2.9 × 10⁻⁴	3.3 × 10⁻³
JAKMIP1	152789	Q96N16	-0.6	5.8 × 10⁻⁵	8.7 × 10⁻⁴
SLC19A3	80704	Q9BZV2	-0.6	3.8 × 10⁻⁴	4.0 × 10⁻³
NMU	10874	A0A0B4J202	-0.6	1.0 × 10⁻⁶	3.1 × 10⁻⁵
AIFM2	84883	Q9BRQ8	-0.6	4.0 × 10⁻³	2.4 × 10⁻²
NKX3-1	4824	Q99801	-0.6	9.9 × 10⁻⁴	8.4 × 10⁻³
GLT8D2	83468	Q9H1C3	-0.6	2.0 × 10⁻⁴	2.4 × 10⁻³
HTRA1	5654	Q92743	-0.6	2.2 × 10⁻⁶	5.8 × 10⁻⁵
NRIP3	56675	Q9NQ35	-0.6	4.2 × 10⁻¹²	8.6 × 10⁻¹⁰
COL5A1	1289	A0A024R8E5	-0.6	1.4 × 10⁻⁸	8.8 × 10⁻⁷
ANKRD63	100131244	C9JTQ0	-0.6	2.7 × 10⁻³	1.8 × 10⁻²
PXDC1	221749	Q5TGL8	-0.6	5.3 × 10⁻⁵	8.2 × 10⁻⁴
MTSS1	9788	O43312	-0.6	1.9 × 10⁻⁵	3.6 × 10⁻⁴
SLC44A3	126969	Q8N4M1	-0.6	4.3 × 10⁻³	2.6 × 10⁻²
C11orf45	219833	A0A024R3N7	-0.6	8.5 × 10⁻⁴	7.5 × 10⁻³
PLCE1	51196	Q9P212	-0.6	9.6 × 10⁻⁸	4.4 × 10⁻⁶
PLPP4	196051	Q5VZY2	-0.6	9.4 × 10⁻⁴	8.1 × 10⁻³
HLF	3131	Q16534	-0.6	2.0 × 10⁻⁴	2.4 × 10⁻³
ALDH1A2	8854	O94788	-0.6	2.6 × 10⁻¹⁸	4.0 × 10⁻¹⁵
LGR5	8549	O75473	-0.6	1.4 × 10⁻⁶	4.1 × 10⁻⁵
PROK2	60675	Q9HC23	-0.6	8.6 × 10⁻³	4.2 × 10⁻²
ZBTB16	7704	A0A024R3C6	-0.6	8.4 × 10⁻³	4.1 × 10⁻²
LOC729732	729732		-0.6	3.6 × 10⁻³	2.2 × 10⁻²
HMCN1	83872	Q96RW7	-0.6	8.8 × 10⁻⁵	1.2 × 10⁻³
ARHGEF28	64283	Q8N1W1	-0.6	5.7 × 10⁻⁴	5.5 × 10⁻³
SYTL5	94122	Q8TDW5	-0.6	3.9 × 10⁻³	2.4 × 10⁻²
SEL1L3	23231	Q68CR1	-0.6	2.0 × 10⁻¹⁰	2.4 × 10⁻⁸
ZNF536	9745	O15090	-0.6	8.3 × 10⁻⁶	1.8 × 10⁻⁴
BEX5	340542	Q5H9J7	-0.6	6.1 × 10⁻⁴	5.7 × 10⁻³
SLFN5	162394	B4E128	-0.6	3.1 × 10⁻³	2.0 × 10⁻²
ABCG2	9429	Q9UNQ0	-0.6	1.6 × 10⁻⁴	2.0 × 10⁻³
CXCL16	58191	Q9H2A7	-0.6	2.3 × 10⁻³	1.6 × 10⁻²
C1QL1	10882	O75973	-0.6	1.1 × 10⁻³	9.1 × 10⁻³
DLL1	28514	O00548	-0.6	2.0 × 10⁻⁴	2.4 × 10⁻³
ARHGEF6	9459	B7Z3C7	-0.6	5.8 × 10⁻⁹	4.0 × 10⁻⁷
PAQR5	54852	A0A024R607	-0.6	1.8 × 10⁻⁹	1.5 × 10⁻⁷
GRID1	2894	A8KAN9	-0.6	3.6 × 10⁻⁴	3.8 × 10⁻³
GLRB	2743	P48167	-0.6	2.7 × 10⁻⁵	4.7 × 10⁻⁴
CNPY1	285888	Q3B7I2	-0.6	3.2 × 10⁻⁴	3.5 × 10⁻³
ANKRD33B	651746	A6NCL7	-0.6	5.0 × 10⁻¹⁰	5.1 × 10⁻⁸
KLF7	8609	O75840	-0.6	4.4 × 10⁻⁶	1.0 × 10⁻⁴
DDAH1	23576	B4E3V1	-0.6	2.9 × 10⁻¹⁶	2.4 × 10⁻¹³
MFSD6	54842	Q6ZSS7	-0.6	2.7 × 10⁻⁴	3.1 × 10⁻³
ATRNL1	26033	Q4G0Y2	-0.6	8.5 × 10⁻⁸	4.1 × 10⁻⁶
SOX21-AS1	100507533		-0.6	9.7 × 10⁻⁸	4.4 × 10⁻⁶
LOC646471	646471		-0.6	1.1 × 10⁻²	5.0 × 10⁻²
IL6R	3570	A0N0L5	-0.6	3.4 × 10⁻⁴	3.7 × 10⁻³
ZNF521	25925	J3KTI4	-0.6	2.4 × 10⁻⁶	6.2 × 10⁻⁵
FAM83B	222584	Q5T0W9	-0.6	1.7 × 10⁻⁴	2.2 × 10⁻³
NID2	22795	Q14112	-0.6	6.2 × 10⁻¹³	1.6 × 10⁻¹⁰
AFAP1L1	134265	Q8TED9	-0.6	2.4 × 10⁻⁷	9.1 × 10⁻⁶
DCLK1	9201	O15075	-0.6	6.8 × 10⁻⁴	6.3 × 10⁻³
TWIST2	117581	A0A024R4D4	-0.6	3.4 × 10⁻⁵	5.7 × 10⁻⁴
CUX2	23316	O14529	-0.6	7.6 × 10⁻⁵	1.1 × 10⁻³
FBLN2	2199	P98095	-0.6	1.3 × 10⁻³	1.0 × 10⁻²
BEND4	389206	Q6ZU67	-0.6	1.0 × 10⁻¹⁵	6.6 × 10⁻¹³
HLA-B	3106	E5FQ95	-0.6	3.8 × 10⁻¹⁶	2.7 × 10⁻¹³
CHRD	8646	E7ESX1	-0.6	9.6 × 10⁻³	4.5 × 10⁻²
EDNRA	1909	P25101	-0.6	1.3 × 10⁻⁵	2.5 × 10⁻⁴
FAM149A	25854	A5PLN7	-0.6	3.3 × 10⁻³	2.1 × 10⁻²
ASPHD2	57168	A0A024R1D0	-0.6	2.0 × 10⁻⁷	7.8 × 10⁻⁶
AFF2	2334	P51816	-0.6	2.2 × 10⁻⁷	8.5 × 10⁻⁶
PPFIA4	8497	B4DIS5	-0.6	7.7 × 10⁻⁵	1.1 × 10⁻³
PRKCQ	5588	Q04759	-0.6	3.3 × 10⁻⁵	5.5 × 10⁻⁴
HIVEP3	59269	Q5T1R4	-0.6	8.9 × 10⁻³	4.3 × 10⁻²
TTC9	23508	A0A024R6B1	-0.6	4.4 × 10⁻⁴	4.4 × 10⁻³
SLC35F1	222553	Q5T1Q4	-0.6	1.1 × 10⁻¹⁴	5.2 × 10⁻¹²
MEIS3	56917	A0A024R0S2	-0.6	9.6 × 10⁻⁶	2.0 × 10⁻⁴
XK	7504	P51811	-0.6	4.8 × 10⁻⁷	1.6 × 10⁻⁵
SLC22A17	51310	Q8WUG5	-0.6	2.4 × 10⁻³	1.7 × 10⁻²
TMEM255A	55026	Q5JRV8	-0.6	1.3 × 10⁻⁴	1.7 × 10⁻³
SLC7A3	84889	Q8WY07	-0.6	1.4 × 10⁻⁴	1.8 × 10⁻³
GBX1	2636	Q14549	-0.6	7.4 × 10⁻³	3.8 × 10⁻²
VANGL2	57216	A8K4L6	-0.6	8.3 × 10⁻¹²	1.5 × 10⁻⁹
DGKA	1606	A0A024RB23	-0.6	7.3 × 10⁻³	3.8 × 10⁻²
DTX3L	151636	Q8TDB6	-0.6	6.6 × 10⁻⁵	9.8 × 10⁻⁴
MBNL3	55796	Q9NUK0	-0.6	3.1 × 10⁻¹⁶	2.4 × 10⁻¹³
NPAS2	4862	A2I2P5	-0.6	2.3 × 10⁻³	1.6 × 10⁻²
RNF207	388591	Q6ZRF8	-0.6	1.2 × 10⁻³	9.8 × 10⁻³
HAPLN3	145864	A8K7T8	-0.6	1.6 × 10⁻⁵	3.0 × 10⁻⁴
ROR1	4919	Q01973	-0.6	9.2 × 10⁻⁸	4.3 × 10⁻⁶
ENPP2	5168	Q13822	-0.6	2.5 × 10⁻³	1.7 × 10⁻²
DUSP8	1850	Q13202	-0.5	3.6 × 10⁻⁴	3.8 × 10⁻³
VAV3	10451	Q9UKW4	-0.5	7.8 × 10⁻⁶	1.7 × 10⁻⁴
CAVIN1	284119	Q6NZI2	-0.5	2.4 × 10⁻⁷	9.1 × 10⁻⁶
ENO2	2026	P09104	-0.5	4.8 × 10⁻⁴	4.7 × 10⁻³
HAGLR	401022		-0.5	1.0 × 10⁻⁴	1.4 × 10⁻³
TMEM74	157753	A0A024R9D4	-0.5	8.0 × 10⁻⁵	1.1 × 10⁻³
C14orf132	56967	Q9NPU4	-0.5	8.1 × 10⁻¹¹	1.1 × 10⁻⁸
KALRN	8997	J3QSW6	-0.5	3.8 × 10⁻⁴	4.0 × 10⁻³
LOXL2	4017	Q9Y4K0	-0.5	4.1 × 10⁻⁴	4.2 × 10⁻³
SLIT1	6585	A6H8V1	-0.5	7.0 × 10⁻³	3.6 × 10⁻²
TMCC3	57458	G3V207	-0.5	5.3 × 10⁻⁶	1.2 × 10⁻⁴
LOC100506985	100506985		-0.5	4.3 × 10⁻³	2.6 × 10⁻²
ELOVL7	79993	A1L3X0	-0.5	3.4 × 10⁻⁷	1.2 × 10⁻⁵
TMEM178B	100507421	H3BS89	-0.5	4.3 × 10⁻⁸	2.3 × 10⁻⁶
DOCK8	81704	Q8NF50	-0.5	6.5 × 10⁻⁴	6.0 × 10⁻³
S1PR3	1903	Q99500	-0.5	2.4 × 10⁻⁴	2.7 × 10⁻³
LHX1	3975	P48742	-0.5	9.6 × 10⁻⁴	8.2 × 10⁻³
ITPR3	3710	A6H8K3	-0.5	3.4 × 10⁻¹²	7.1 × 10⁻¹⁰
LINC00963	100506190		-0.5	1.6 × 10⁻⁴	2.0 × 10⁻³
TSPAN18	90139	Q96SJ8	-0.5	6.6 × 10⁻⁵	9.8 × 10⁻⁴
GPC4	2239	O75487	-0.5	2.8 × 10⁻⁹	2.1 × 10⁻⁷
CAV1	857	A0A024R757	-0.5	1.0 × 10⁻⁴	1.4 × 10⁻³
TRMT9B	57604	Q9P272	-0.5	1.0 × 10⁻²	4.7 × 10⁻²
PCDH1	5097	B4DUA8	-0.5	4.8 × 10⁻³	2.8 × 10⁻²
PXDN	7837	Q92626	-0.5	2.1 × 10⁻¹³	6.2 × 10⁻¹¹
VGLL3	389136	A8MV65	-0.5	2.7 × 10⁻⁶	6.9 × 10⁻⁵
B4GALNT1	2583	Q00973	-0.5	8.9 × 10⁻⁵	1.2 × 10⁻³
STEAP1	26872	Q9UHE8	-0.5	9.6 × 10⁻⁶	2.0 × 10⁻⁴
CPEB1	64506	Q9BZB8	-0.5	8.9 × 10⁻³	4.3 × 10⁻²
NPTX2	4885	P47972	-0.5	4.2 × 10⁻⁶	1.0 × 10⁻⁴
HLA-DRB1	3123	P01912	-0.5	1.1 × 10⁻³	9.4 × 10⁻³
NAV1	89796	Q8NEY1	-0.5	2.0 × 10⁻⁶	5.4 × 10⁻⁵
ARHGEF4	50649	Q9NR80	-0.5	2.0 × 10⁻⁵	3.7 × 10⁻⁴
SORBS2	8470	O94875	-0.5	2.7 × 10⁻³	1.8 × 10⁻²
GSDME	1687	O60443	-0.5	5.5 × 10⁻³	3.1 × 10⁻²
PIK3CD	5293	O00329	-0.5	8.0 × 10⁻⁵	1.1 × 10⁻³
KCNH2	3757	A0A090N8Q0	-0.5	4.3 × 10⁻³	2.6 × 10⁻²
SPTB	6710	P11277	-0.5	8.6 × 10⁻⁸	4.1 × 10⁻⁶
SYK	6850	A0A024R273	-0.5	3.6 × 10⁻¹⁰	3.9 × 10⁻⁸
PREX1	57580	Q8TCU6	-0.5	4.0 × 10⁻⁶	9.6 × 10⁻⁵
ZDHHC22	283576	Q8N966	-0.5	2.0 × 10⁻⁸	1.2 × 10⁻⁶
NCAM1	4684	P13591	-0.5	8.7 × 10⁻¹¹	1.1 × 10⁻⁸
PRRT4	401399	C9JH25	-0.5	6.2 × 10⁻⁴	5.8 × 10⁻³
FXYD5	53827	Q96DB9	-0.5	4.8 × 10⁻⁴	4.8 × 10⁻³
LDLRAD4	753	O15165	-0.5	2.2 × 10⁻⁴	2.6 × 10⁻³
FMO4	2329	P31512	-0.5	9.1 × 10⁻³	4.4 × 10⁻²
DAAM2	23500	Q86T65	-0.5	7.6 × 10⁻⁸	3.7 × 10⁻⁶
SH2D5	400745	Q6ZV89	-0.5	3.8 × 10⁻⁶	9.2 × 10⁻⁵
GUCY1A2	2977	P33402	-0.5	5.0 × 10⁻⁶	1.2 × 10⁻⁴
FNDC10	643988	F2Z333	-0.5	8.9 × 10⁻⁷	2.7 × 10⁻⁵
PANX2	56666	Q96RD6	-0.5	4.0 × 10⁻³	2.5 × 10⁻²
CTC-338M12.4	101928649		-0.5	1.9 × 10⁻³	1.4 × 10⁻²
FENDRR	400550		-0.5	9.9 × 10⁻⁴	8.4 × 10⁻³
USH1C	10083	A0A0S2Z4V1	-0.5	1.1 × 10⁻²	5.0 × 10⁻²
EDIL3	10085	O43854	-0.5	4.3 × 10⁻⁴	4.4 × 10⁻³
DGAT2	84649	Q96PD7	-0.5	2.1 × 10⁻⁷	8.1 × 10⁻⁶
PTPRD	5789	Q59H90	-0.5	8.1 × 10⁻⁹	5.4 × 10⁻⁷
NPL	80896	Q9BXD5	-0.5	2.0 × 10⁻⁵	3.7 × 10⁻⁴
FAM81A	145773	Q8TBF8	-0.5	7.1 × 10⁻⁴	6.5 × 10⁻³
ALDH1A3	220	A0A024RC95	-0.5	2.1 × 10⁻³	1.5 × 10⁻²
TPK1	27010	F5GZG6	-0.5	1.0 × 10⁻²	4.8 × 10⁻²
ARHGAP31	57514	Q2M1Z3	-0.5	8.9 × 10⁻⁵	1.2 × 10⁻³
FRMD4A	55691	Q9NW91	-0.5	9.4 × 10⁻⁶	2.0 × 10⁻⁴
F12	2161	P00748	-0.5	2.6 × 10⁻⁴	3.0 × 10⁻³
ITGA7	3679	Q13683	-0.5	8.0 × 10⁻⁴	7.1 × 10⁻³
HLA-DPA1	3113	P20036	-0.5	3.1 × 10⁻³	2.0 × 10⁻²
PLEKHA2	59339	A8K727	-0.5	2.8 × 10⁻⁵	4.9 × 10⁻⁴
ERBB4	2066	Q15303	-0.5	3.4 × 10⁻⁵	5.7 × 10⁻⁴
GHR	2690	P10912	-0.5	5.2 × 10⁻⁵	8.1 × 10⁻⁴
FXYD6	53826	A0A024R3J8	-0.5	6.7 × 10⁻⁴	6.2 × 10⁻³
CCDC3	83643	Q9BQI4	-0.5	3.8 × 10⁻⁸	2.1 × 10⁻⁶
CCDC74B	91409	Q96LY2	-0.5	1.5 × 10⁻³	1.2 × 10⁻²
FLT1	2321	P17948	-0.5	3.0 × 10⁻⁷	1.1 × 10⁻⁵
LRFN5	145581	G3V364	-0.5	8.1 × 10⁻³	4.0 × 10⁻²
NOL4	8715	B4DLW2	-0.5	6.6 × 10⁻³	3.5 × 10⁻²
EFNB3	1949	Q15768	-0.5	8.2 × 10⁻⁵	1.2 × 10⁻³
DLX6	1750	P56179	-0.5	1.7 × 10⁻³	1.3 × 10⁻²
LOX	4015	B7ZAJ4	-0.5	1.0 × 10⁻³	8.6 × 10⁻³
EPB41L4A	64097	Q8N8X1	-0.5	2.7 × 10⁻⁴	3.0 × 10⁻³
SLC4A4	8671	A0A024RD97	-0.5	3.5 × 10⁻⁵	5.8 × 10⁻⁴
RAB3B	5865	P20337	-0.5	3.3 × 10⁻⁶	8.2 × 10⁻⁵
LOXL1-AS1	100287616		-0.5	3.6 × 10⁻³	2.2 × 10⁻²
ARMH4	145407	Q86TY3	-0.5	7.1 × 10⁻³	3.7 × 10⁻²
PAQR8	85315	B3KXW6	-0.5	1.7 × 10⁻⁶	4.6 × 10⁻⁵
LINGO1	84894	Q96FE5	-0.5	5.3 × 10⁻⁵	8.1 × 10⁻⁴
XYLT1	64131	Q86Y38	-0.5	7.4 × 10⁻⁵	1.1 × 10⁻³
PRKCH	5583	P24723	-0.5	1.2 × 10⁻⁶	3.4 × 10⁻⁵
TLE2	7089	Q04725	-0.5	3.2 × 10⁻³	2.1 × 10⁻²
NAP1L3	4675	Q8IYV1	-0.5	8.0 × 10⁻⁸	3.9 × 10⁻⁶
SLC16A9	220963	Q7RTY1	-0.5	5.8 × 10⁻⁷	1.9 × 10⁻⁵
PGAP4	84302	A0A024R188	-0.5	8.8 × 10⁻¹⁰	8.0 × 10⁻⁸
PLXNA2	5362	O75051	-0.5	5.7 × 10⁻⁵	8.7 × 10⁻⁴
BATF3	55509	Q9NR55	-0.5	8.1 × 10⁻⁴	7.2 × 10⁻³
EPHB3	2049	P54753	-0.5	6.8 × 10⁻³	3.5 × 10⁻²
ST6GALNAC3	256435	Q8NDV1	-0.5	5.3 × 10⁻⁷	1.8 × 10⁻⁵
EML6	400954	Q6ZMW3	-0.5	9.8 × 10⁻⁵	1.3 × 10⁻³
SH3GL2	6456	Q7Z376	-0.5	1.1 × 10⁻³	9.1 × 10⁻³
TENT5C	54855	Q5VWP2	-0.5	1.4 × 10⁻⁴	1.8 × 10⁻³
PHF21B	112885	A0A0S2Z665	-0.5	1.6 × 10⁻³	1.2 × 10⁻²
SH2D4A	63898	Q9H788	-0.5	2.0 × 10⁻⁴	2.4 × 10⁻³
PARM1	25849	Q6UWI2	-0.5	2.2 × 10⁻⁴	2.6 × 10⁻³
HECW2	57520	A0A2C9F2N4	-0.5	1.1 × 10⁻⁴	1.4 × 10⁻³
PNMA6A	84968	P0CW24	-0.5	3.2 × 10⁻⁶	8.1 × 10⁻⁵
CHST2	9435	Q9Y4C5	-0.5	1.4 × 10⁻³	1.1 × 10⁻²
FLRT2	23768	O43155	-0.5	2.5 × 10⁻⁴	2.8 × 10⁻³
KCNG1	3755	Q86Y85	-0.5	3.6 × 10⁻⁷	1.3 × 10⁻⁵
FRY	10129	Q5TBA9	-0.5	5.9 × 10⁻³	3.2 × 10⁻²
FNDC4	64838	Q9H6D8	-0.5	5.3 × 10⁻³	3.0 × 10⁻²
OTULINL	54491	Q9NUU6	-0.5	1.1 × 10⁻⁷	4.9 × 10⁻⁶
CITED1	4435	Q99966	-0.5	3.5 × 10⁻¹⁷	4.0 × 10⁻¹⁴
PMEPA1	56937	Q969W9	-0.5	5.3 × 10⁻⁴	5.2 × 10⁻³
ELMOD1	55531	Q8N336	-0.5	1.1 × 10⁻³	8.8 × 10⁻³
PRDM16	63976	Q9HAZ2	-0.5	4.5 × 10⁻⁴	4.5 × 10⁻³
CAV2	858	P51636	-0.5	1.9 × 10⁻⁷	7.5 × 10⁻⁶
SOX8	30812	P57073	-0.5	1.0 × 10⁻³	8.4 × 10⁻³
ANKRD44	91526	Q8N8A2	-0.5	3.8 × 10⁻⁴	4.0 × 10⁻³
NPNT	255743	Q6UXI9	-0.5	7.4 × 10⁻³	3.8 × 10⁻²
RYR2	6262	Q92736	-0.5	1.7 × 10⁻⁵	3.3 × 10⁻⁴
PLAAT3	11145	P53816	-0.5	2.8 × 10⁻³	1.9 × 10⁻²
EOMES	8320	B7Z4K0	-0.5	8.7 × 10⁻³	4.3 × 10⁻²
TGFB3	7043	P10600	-0.5	6.9 × 10⁻³	3.6 × 10⁻²
EMX2OS	196047		-0.5	8.3 × 10⁻³	4.1 × 10⁻²
SCD5	79966	Q86SK9	-0.5	7.1 × 10⁻⁹	4.8 × 10⁻⁷
ADAMTS9	56999	Q9P2N4	-0.5	5.4 × 10⁻⁵	8.3 × 10⁻⁴
PHACTR3	116154	Q96KR7	-0.5	7.3 × 10⁻³	3.7 × 10⁻²
EPHB2	2048	B4DSE0	-0.5	4.0 × 10⁻⁷	1.4 × 10⁻⁵
CA12	771	O43570	-0.5	8.0 × 10⁻⁶	1.7 × 10⁻⁴
SEMA6B	10501	Q9H3T3	-0.5	1.3 × 10⁻³	1.0 × 10⁻²
SLC7A8	23428	Q9UHI5	-0.5	5.4 × 10⁻⁴	5.3 × 10⁻³
TIMP3	7078	P35625	-0.5	1.2 × 10⁻⁹	1.1 × 10⁻⁷
TRIM7	81786	Q9C029	-0.4	6.2 × 10⁻³	3.4 × 10⁻²
PURG	29942	Q9UJV8	-0.4	1.0 × 10⁻²	4.7 × 10⁻²
PPP4R4	57718	Q6NUP7	-0.4	3.7 × 10⁻⁴	3.9 × 10⁻³
TFEB	7942	B0QYS6	-0.4	3.3 × 10⁻³	2.1 × 10⁻²
ADAMTS15	170689	Q8TE58	-0.4	2.9 × 10⁻³	1.9 × 10⁻²
SMCO4	56935	A0A024R3A3	-0.4	3.9 × 10⁻⁴	4.0 × 10⁻³
ARL4C	10123	P56559	-0.4	1.7 × 10⁻⁸	1.1 × 10⁻⁶
RGL1	23179	B7Z2W5	-0.4	2.2 × 10⁻⁴	2.6 × 10⁻³
TMEM266	123591	Q2M3C6	-0.4	6.8 × 10⁻³	3.6 × 10⁻²
LENG9	94059	A0A087WVD1	-0.4	8.3 × 10⁻⁴	7.4 × 10⁻³
GDF7	151449	Q75RY1	-0.4	9.1 × 10⁻³	4.4 × 10⁻²
RGS17	26575	Q9UGC6	-0.4	5.9 × 10⁻³	3.2 × 10⁻²
FOXD3	27022	Q9UJU5	-0.4	9.3 × 10⁻³	4.5 × 10⁻²
MFAP3L	9848	O75121	-0.4	4.7 × 10⁻⁷	1.6 × 10⁻⁵
SEMA3E	9723	O15041	-0.4	2.1 × 10⁻⁴	2.5 × 10⁻³
COL4A1	1282	A5PKV2	-0.4	7.6 × 10⁻¹⁰	7.1 × 10⁻⁸
B3GALNT1	8706	O75752	-0.4	2.0 × 10⁻³	1.4 × 10⁻²
GALNT18	374378	Q58A54	-0.4	2.5 × 10⁻⁷	9.3 × 10⁻⁶
EMX2	2018	Q04743	-0.4	5.5 × 10⁻³	3.1 × 10⁻²
AGBL3	340351	Q8NEM8	-0.4	7.5 × 10⁻³	3.8 × 10⁻²
MCOLN3	55283	Q8TDD5	-0.4	2.3 × 10⁻³	1.6 × 10⁻²
HUNK	30811	P57058	-0.4	3.3 × 10⁻⁴	3.6 × 10⁻³
GPR176	11245	Q14439	-0.4	3.1 × 10⁻⁷	1.1 × 10⁻⁵
DNAJC6	9829	O75061	-0.4	9.3 × 10⁻⁸	4.3 × 10⁻⁶
TRHDE	29953	Q9UKU6	-0.4	2.8 × 10⁻³	1.9 × 10⁻²
ARHGAP26	23092	A0A0S2Z536	-0.4	1.7 × 10⁻⁵	3.2 × 10⁻⁴
WTIP	126374	A6NIX2	-0.4	9.4 × 10⁻³	4.5 × 10⁻²
KAZN	23254	Q674X7	-0.4	2.2 × 10⁻⁶	5.8 × 10⁻⁵
INKA2	55924	Q9NTI7	-0.4	7.5 × 10⁻³	3.8 × 10⁻²
RCAN3	11123	A0A024RAH2	-0.4	4.3 × 10⁻⁸	2.3 × 10⁻⁶
NES	10763	P48681	-0.4	5.1 × 10⁻³	2.9 × 10⁻²
NKD2	85409	Q969F2	-0.4	3.2 × 10⁻⁵	5.4 × 10⁻⁴
METRNL	284207	Q641Q3	-0.4	2.1 × 10⁻⁴	2.5 × 10⁻³
TSHZ3	57616	Q63HK5	-0.4	1.4 × 10⁻⁴	1.8 × 10⁻³
SERPINI1	5274	A0A0S2Z455	-0.4	9.4 × 10⁻³	4.5 × 10⁻²
MDGA1	266727	Q8NFP4	-0.4	2.8 × 10⁻³	1.8 × 10⁻²
ENC1	8507	O14682	-0.4	2.5 × 10⁻⁴	2.9 × 10⁻³
ADCY1	107	C9J1J0	-0.4	3.8 × 10⁻⁹	2.9 × 10⁻⁷
HPCAL4	51440	Q9UM19	-0.4	4.2 × 10⁻⁴	4.3 × 10⁻³
RAB9B	51209	Q9NP90	-0.4	6.9 × 10⁻⁴	6.3 × 10⁻³
RIMS4	140730	Q9H426	-0.4	5.8 × 10⁻¹¹	8.1 × 10⁻⁹
TMEM185A	84548	B7Z4G6	-0.4	1.3 × 10⁻⁵	2.6 × 10⁻⁴
SMIM10L2A	399668	P0DMW4	-0.4	2.1 × 10⁻³	1.5 × 10⁻²
CLMN	79789	Q6NUQ2	-0.4	2.1 × 10⁻⁴	2.5 × 10⁻³
CAMK1D	57118	Q5SQQ7	-0.4	4.9 × 10⁻⁵	7.7 × 10⁻⁴
DNM3	26052	Q9UQ16	-0.4	3.5 × 10⁻³	2.2 × 10⁻²
MYO3A	53904	Q8NEV4	-0.4	3.2 × 10⁻³	2.1 × 10⁻²
ALPL	249	A0A024RAG0	-0.4	9.7 × 10⁻³	4.6 × 10⁻²
BACH2	60468	Q9BYV9	-0.4	3.9 × 10⁻⁴	4.1 × 10⁻³
GPM6A	2823	P51674	-0.4	8.1 × 10⁻⁴	7.2 × 10⁻³
FGF13	2258	Q92913	-0.4	1.6 × 10⁻⁵	3.1 × 10⁻⁴
TESC	54997	Q96BS2	-0.4	2.4 × 10⁻³	1.7 × 10⁻²
TAP1	6890	A0A0S2Z5A6	-0.4	1.9 × 10⁻⁵	3.6 × 10⁻⁴
TACC2	10579	B2RWP4	-0.4	3.1 × 10⁻³	2.0 × 10⁻²
KIF21B	23046	O75037	-0.4	4.8 × 10⁻⁴	4.8 × 10⁻³
NR4A1	3164	P22736	-0.4	1.7 × 10⁻³	1.2 × 10⁻²
LONRF2	164832	Q1L5Z9	-0.4	2.4 × 10⁻⁸	1.4 × 10⁻⁶
BMAL1	406	A0A140VKD3	-0.4	3.4 × 10⁻³	2.1 × 10⁻²
FAT3	120114	Q8TDW7	-0.4	5.3 × 10⁻¹⁰	5.2 × 10⁻⁸
EMILIN3	90187	Q9NT22	-0.4	5.3 × 10⁻⁹	3.7 × 10⁻⁷
RAB30	27314	A8K5R1	-0.4	1.1 × 10⁻⁴	1.4 × 10⁻³
TMEM121	80757	Q9BTD3	-0.4	6.1 × 10⁻⁴	5.8 × 10⁻³
LONRF3	79836	A8K2D3	-0.4	1.9 × 10⁻⁶	5.2 × 10⁻⁵
SCN5A	6331	Q14524	-0.4	4.8 × 10⁻⁴	4.7 × 10⁻³
MAP1B	4131	A2BDK6	-0.4	2.1 × 10⁻¹²	4.5 × 10⁻¹⁰
SERPINE2	5270	A0A024R498	-0.4	7.0 × 10⁻⁶	1.6 × 10⁻⁴
RETREG1	54463	Q9H6L5	-0.4	2.9 × 10⁻⁴	3.3 × 10⁻³
CPM	1368	P14384	-0.4	9.3 × 10⁻³	4.5 × 10⁻²
PDE4D	5144	A0A140VJR0	-0.4	2.5 × 10⁻⁶	6.5 × 10⁻⁵
IFFO2	126917	Q5TF58	-0.4	1.1 × 10⁻⁷	5.0 × 10⁻⁶
EPOP	100170841	A6NHQ4	-0.4	1.3 × 10⁻⁸	8.5 × 10⁻⁷
CCDC181	57821	B2R917	-0.4	1.7 × 10⁻⁵	3.3 × 10⁻⁴
GAB2	9846	Q9UQC2	-0.4	9.4 × 10⁻³	4.5 × 10⁻²
NR3C2	4306	B0ZBF6	-0.4	1.1 × 10⁻⁶	3.2 × 10⁻⁵
PIP4P2	55529	Q8N4L2	-0.4	5.6 × 10⁻³	3.1 × 10⁻²
COL2A1	1280	P02458	-0.4	2.4 × 10⁻⁷	9.0 × 10⁻⁶
CALCB	797	P10092	-0.4	3.5 × 10⁻⁴	3.7 × 10⁻³
ETV6	2120	A0A0S2Z3C9	-0.4	4.0 × 10⁻³	2.4 × 10⁻²
NEBL	10529	O76041	-0.4	2.2 × 10⁻⁵	3.9 × 10⁻⁴
PTPRU	10076	Q92729	-0.4	1.5 × 10⁻¹²	3.5 × 10⁻¹⁰
DPYSL2	1808	A0A1C7CYX9	-0.4	3.7 × 10⁻¹¹	5.6 × 10⁻⁹
ADAM19	8728	Q8TBU7	-0.4	1.4 × 10⁻⁴	1.8 × 10⁻³
UNCX	340260	A6NJT0	-0.4	3.2 × 10⁻⁴	3.5 × 10⁻³
STXBP6	29091	Q8NFX7	-0.4	1.0 × 10⁻³	8.4 × 10⁻³
IL4R	3566	P24394	-0.4	4.2 × 10⁻⁴	4.3 × 10⁻³
TMEFF1	8577	Q8IYR6	-0.4	5.3 × 10⁻³	3.0 × 10⁻²
NOS2	4843	P35228	-0.4	3.9 × 10⁻³	2.4 × 10⁻²
COL25A1	84570	A8MWQ5	-0.4	2.7 × 10⁻⁷	1.0 × 10⁻⁵
LRP2	4036	P98164	-0.4	3.8 × 10⁻⁶	9.1 × 10⁻⁵
COL27A1	85301	Q8IZC6	-0.4	3.5 × 10⁻⁵	5.7 × 10⁻⁴
CYBRD1	79901	Q53TN4	-0.4	6.3 × 10⁻³	3.4 × 10⁻²
GFI1	2672	Q99684	-0.4	5.0 × 10⁻³	2.9 × 10⁻²
JDP2	122953	A0A024R6D7	-0.4	6.1 × 10⁻³	3.3 × 10⁻²
NDRG2	57447	Q9UN36	-0.4	1.3 × 10⁻⁵	2.6 × 10⁻⁴
NFE2L3	9603	Q9Y4A8	-0.4	2.1 × 10⁻⁹	1.6 × 10⁻⁷
ADAM23	8745	A0A024R3W8	-0.4	1.1 × 10⁻⁵	2.2 × 10⁻⁴
PCDH20	64881	B3KSZ7	-0.4	1.9 × 10⁻⁴	2.3 × 10⁻³
PRKCQ-AS1	439949		-0.4	1.7 × 10⁻³	1.3 × 10⁻²
TMEM144	55314	Q7Z5S9	-0.4	5.7 × 10⁻⁴	5.4 × 10⁻³
VASH2	79805	A0A140VJZ5	-0.4	2.5 × 10⁻⁴	2.9 × 10⁻³
MEGF11	84465	A6BM72	-0.4	7.9 × 10⁻³	4.0 × 10⁻²
AHNAK	79026	Q09666	-0.4	7.7 × 10⁻⁶	1.7 × 10⁻⁴
OLIG2	10215	Q13516	-0.4	1.5 × 10⁻³	1.1 × 10⁻²
SLC16A14	151473	Q7RTX9	-0.4	1.2 × 10⁻³	9.7 × 10⁻³
CARD10	29775	Q9BWT7	-0.4	8.5 × 10⁻⁵	1.2 × 10⁻³
NRCAM	4897	Q14CA1	-0.4	7.7 × 10⁻⁵	1.1 × 10⁻³
SERTAD4	56256	Q9NUC0	-0.4	3.7 × 10⁻⁵	6.1 × 10⁻⁴
PDE3A	5139	Q14432	-0.4	9.8 × 10⁻³	4.6 × 10⁻²
CTTNBP2	83992	Q20BG9	-0.4	1.6 × 10⁻³	1.2 × 10⁻²
LMO7	4008	F8J2B5	-0.4	2.1 × 10⁻⁶	5.6 × 10⁻⁵
KIFC3	3801	Q9BVG8	-0.4	1.7 × 10⁻³	1.3 × 10⁻²
TMCC1-AS1	100507032		-0.4	4.3 × 10⁻³	2.6 × 10⁻²
PRRG4	79056	A0A0S2Z5N9	-0.4	1.2 × 10⁻⁴	1.5 × 10⁻³
PRSS12	8492	P56730	-0.4	4.3 × 10⁻⁵	6.9 × 10⁻⁴
GAS7	8522	O60861	-0.4	4.2 × 10⁻³	2.5 × 10⁻²
MICAL2	9645	O94851	-0.4	2.4 × 10⁻⁴	2.8 × 10⁻³
COLEC12	81035	Q5KU26	-0.4	1.4 × 10⁻⁷	5.9 × 10⁻⁶
FN1	2335	B7ZLE5	-0.4	4.0 × 10⁻⁹	3.0 × 10⁻⁷
IGFBPL1	347252	Q8WX77	-0.4	1.6 × 10⁻⁵	3.1 × 10⁻⁴
ZDHHC23	254887	B3KXV3	-0.4	1.2 × 10⁻⁵	2.4 × 10⁻⁴
CRABP2	1382	P29373	-0.4	1.0 × 10⁻⁴	1.4 × 10⁻³
KLRG2	346689	A4D1S0	-0.4	1.0 × 10⁻³	8.4 × 10⁻³
ARHGAP22	58504	Q7Z5H3	-0.4	5.4 × 10⁻⁴	5.3 × 10⁻³
SYTL4	94121	A0A024RCF8	-0.4	1.6 × 10⁻³	1.2 × 10⁻²
TCF24	100129654	Q7RTU0	-0.4	7.2 × 10⁻⁴	6.5 × 10⁻³
TSHZ2	128553	Q9NRE2	-0.4	2.0 × 10⁻³	1.4 × 10⁻²
SPTBN2	6712	O15020	-0.4	1.1 × 10⁻¹³	3.3 × 10⁻¹¹
NUDT10	170685	Q8NFP7	-0.4	9.0 × 10⁻⁵	1.2 × 10⁻³
KIT	3815	A0A024RDA0	-0.4	2.4 × 10⁻⁶	6.3 × 10⁻⁵
PAQR7	164091	Q86WK9	-0.4	7.8 × 10⁻³	3.9 × 10⁻²
CA8	767	P35219	-0.4	2.8 × 10⁻⁵	4.8 × 10⁻⁴
SH3BGRL2	83699	Q9UJC5	-0.4	6.1 × 10⁻⁸	3.0 × 10⁻⁶
TRAF3IP2	10758	O43734	-0.4	1.1 × 10⁻³	9.3 × 10⁻³
GLRX	2745	A0A024RAM2	-0.4	1.2 × 10⁻³	9.6 × 10⁻³
ARHGEF40	55701	Q8TER5	-0.3	1.1 × 10⁻⁴	1.5 × 10⁻³
LRP4	4038	O75096	-0.3	1.1 × 10⁻⁵	2.3 × 10⁻⁴
NALF2	27112	O75949	-0.3	8.1 × 10⁻⁶	1.7 × 10⁻⁴
DNAH1	25981	A0A140VJI6	-0.3	3.6 × 10⁻³	2.2 × 10⁻²
MCC	4163	P23508	-0.3	3.9 × 10⁻¹⁰	4.1 × 10⁻⁸
PPP1R14C	81706	Q8TAE6	-0.3	5.1 × 10⁻⁸	2.7 × 10⁻⁶
EPHA2	1969	A0A024QZA8	-0.3	9.1 × 10⁻⁵	1.3 × 10⁻³
CDC42EP3	10602	Q9UKI2	-0.3	3.5 × 10⁻⁴	3.8 × 10⁻³
TNNT1	7138	P13805	-0.3	4.5 × 10⁻³	2.7 × 10⁻²
QPCT	25797	Q16769	-0.3	2.6 × 10⁻³	1.8 × 10⁻²
REEP1	65055	E7EUF7	-0.3	4.4 × 10⁻⁴	4.4 × 10⁻³
LARGE2	120071	Q8N3Y3	-0.3	6.1 × 10⁻³	3.3 × 10⁻²
INSYN1	388135	Q2T9L4	-0.3	1.3 × 10⁻³	1.0 × 10⁻²
KCNK5	8645	A0A024RD32	-0.3	7.3 × 10⁻⁴	6.6 × 10⁻³
RTN4RL2	349667	Q86UN3	-0.3	4.9 × 10⁻³	2.8 × 10⁻²
RPS6KA2	6196	Q15349	-0.3	7.5 × 10⁻⁵	1.1 × 10⁻³
GCA	25801	H7BXD5	-0.3	4.3 × 10⁻⁵	6.9 × 10⁻⁴
PLA2G4A	5321	B4DZI4	-0.3	9.3 × 10⁻⁷	2.9 × 10⁻⁵
MAP7	9053	Q14244	-0.3	4.4 × 10⁻⁷	1.5 × 10⁻⁵
GPM6B	2824	Q13491	-0.3	1.7 × 10⁻⁶	4.7 × 10⁻⁵
PRELID2	153768	Q8N945	-0.3	1.7 × 10⁻⁴	2.1 × 10⁻³
DENND2C	163259	Q68D51	-0.3	1.2 × 10⁻⁴	1.6 × 10⁻³
NRP2	8828	O60462	-0.3	1.7 × 10⁻⁵	3.3 × 10⁻⁴
GJA3	2700	Q9Y6H8	-0.3	1.2 × 10⁻³	9.7 × 10⁻³
TNFRSF11A	8792	Q9Y6Q6	-0.3	5.8 × 10⁻⁴	5.5 × 10⁻³
SP8	221833	A8K350	-0.3	6.1 × 10⁻³	3.3 × 10⁻²
CDR1	1038	P51861	-0.3	1.4 × 10⁻⁵	2.8 × 10⁻⁴
ADD2	119	P35612	-0.3	8.6 × 10⁻⁸	4.1 × 10⁻⁶
GALNT10	55568	Q86SR1	-0.3	1.1 × 10⁻⁶	3.2 × 10⁻⁵
MGAT3	4248	Q09327	-0.3	2.1 × 10⁻⁴	2.5 × 10⁻³
STS	412	P08842	-0.3	2.8 × 10⁻³	1.9 × 10⁻²
TPBG	7162	Q13641	-0.3	4.3 × 10⁻⁵	6.9 × 10⁻⁴
CLSTN3	9746	Q9BQT9	-0.3	3.7 × 10⁻⁶	9.1 × 10⁻⁵
CARMIL2	146206	Q6F5E8	-0.3	3.5 × 10⁻⁴	3.7 × 10⁻³
LEF1	51176	Q659G9	-0.3	7.2 × 10⁻⁷	2.3 × 10⁻⁵
SLCO5A1	81796	Q9H2Y9	-0.3	8.5 × 10⁻³	4.2 × 10⁻²
ZNF853	54753	P0CG23	-0.3	7.5 × 10⁻³	3.8 × 10⁻²
EIF4E3	317649	Q8N5X7	-0.3	7.4 × 10⁻⁴	6.7 × 10⁻³
ITPR1	3708	B4DER3	-0.3	2.0 × 10⁻⁵	3.6 × 10⁻⁴
PODXL	5420	O00592	-0.3	5.0 × 10⁻⁶	1.2 × 10⁻⁴
WSCD1	23302	Q658N2	-0.3	5.6 × 10⁻⁶	1.3 × 10⁻⁴
FHOD3	80206	Q2V2M9	-0.3	1.8 × 10⁻⁵	3.3 × 10⁻⁴
TUBB2B	347733	Q9BVA1	-0.3	1.3 × 10⁻⁸	8.5 × 10⁻⁷
SDC1	6382	P18827	-0.3	3.8 × 10⁻⁴	4.0 × 10⁻³
WIPF1	7456	A0A140VJZ9	-0.3	9.8 × 10⁻⁴	8.3 × 10⁻³
HMOX1	3162	P09601	-0.3	2.0 × 10⁻⁵	3.7 × 10⁻⁴
ITGA6	3655	P23229	-0.3	4.3 × 10⁻⁷	1.5 × 10⁻⁵
MID2	11043	Q9UJV3	-0.3	4.1 × 10⁻⁷	1.4 × 10⁻⁵
RAPGEF4	11069	Q8WZA2	-0.3	4.3 × 10⁻³	2.6 × 10⁻²
GPAT3	84803	A0A024RDG5	-0.3	2.5 × 10⁻³	1.7 × 10⁻²
COL1A1	1277	P02452	-0.3	8.4 × 10⁻³	4.1 × 10⁻²
PDE10A	10846	Q9Y233	-0.3	7.7 × 10⁻⁵	1.1 × 10⁻³
EEIG2	284611	Q5T8I3	-0.3	3.9 × 10⁻⁹	2.9 × 10⁻⁷
CTSH	1512	P09668	-0.3	4.5 × 10⁻⁵	7.1 × 10⁻⁴
RAB29	8934	B2R7I9	-0.3	1.8 × 10⁻⁶	5.1 × 10⁻⁵
FAM184A	79632	Q8NB25	-0.3	4.6 × 10⁻⁵	7.3 × 10⁻⁴
DSC3	1825	Q14574	-0.3	2.4 × 10⁻¹¹	3.8 × 10⁻⁹
RNF144A	9781	P50876	-0.3	2.5 × 10⁻⁴	2.9 × 10⁻³
KCNC4	3749	Q03721	-0.3	4.5 × 10⁻⁵	7.1 × 10⁻⁴
FBXO32	114907	Q969P5	-0.3	3.7 × 10⁻⁴	3.9 × 10⁻³
ELF4	2000	Q99607	-0.3	5.7 × 10⁻⁵	8.7 × 10⁻⁴
ELOVL2	54898	A0A024QZV3	-0.3	1.1 × 10⁻⁶	3.2 × 10⁻⁵
BACE2	25825	Q9Y5Z0	-0.3	8.5 × 10⁻⁷	2.6 × 10⁻⁵
ARHGAP29	9411	Q52LW3	-0.3	5.6 × 10⁻⁷	1.8 × 10⁻⁵
MGC12916	84815		-0.3	5.9 × 10⁻³	3.2 × 10⁻²
ADRA2C	152	P18825	-0.3	1.9 × 10⁻⁵	3.5 × 10⁻⁴
STAMBPL1	57559	Q96FJ0	-0.3	4.1 × 10⁻³	2.5 × 10⁻²
CORO2A	7464	A0A024R150	-0.3	3.3 × 10⁻³	2.1 × 10⁻²
NPDC1	56654	Q9NQX5	-0.3	2.9 × 10⁻³	1.9 × 10⁻²
SATB1	6304	A0A024R2H1	-0.3	3.9 × 10⁻⁶	9.3 × 10⁻⁵
FUT4	2526	P22083	-0.3	1.2 × 10⁻³	9.5 × 10⁻³
DMD	1756	P11532	-0.3	2.3 × 10⁻⁵	4.0 × 10⁻⁴
PDE9A	5152	A0A0S2Z4A3	-0.3	9.9 × 10⁻⁴	8.4 × 10⁻³
TMEM45A	55076	Q9NWC5	-0.3	8.2 × 10⁻³	4.1 × 10⁻²
AFF3	3899	P51826	-0.3	1.6 × 10⁻³	1.2 × 10⁻²
EGLN3	112399	B3KVT0	-0.3	5.8 × 10⁻⁴	5.5 × 10⁻³
LRRC8C	84230	Q8TDW0	-0.3	4.6 × 10⁻⁷	1.5 × 10⁻⁵
NRGN	4900	A0A024R3M7	-0.3	4.5 × 10⁻³	2.6 × 10⁻²
SMIM10L2B	644596	P0DMW4	-0.3	1.1 × 10⁻²	4.9 × 10⁻²
SH3RF3	344558	Q8TEJ3	-0.3	2.0 × 10⁻⁴	2.4 × 10⁻³
SYBU	55638	Q9NX95	-0.3	7.1 × 10⁻³	3.7 × 10⁻²
CHST15	51363	Q7LFX5	-0.3	3.9 × 10⁻⁵	6.3 × 10⁻⁴
JAG2	3714	Q9Y219	-0.3	5.4 × 10⁻⁸	2.8 × 10⁻⁶
THRB	7068	F1D8N7	-0.3	8.1 × 10⁻⁵	1.1 × 10⁻³
GALNT16	57452	Q68VJ8	-0.3	6.8 × 10⁻³	3.6 × 10⁻²
MCOLN2	255231	Q8IZK6	-0.3	5.7 × 10⁻⁴	5.5 × 10⁻³
LAMA1	284217	P25391	-0.3	1.7 × 10⁻⁶	4.8 × 10⁻⁵
RAMP1	10267	E9PC20	-0.3	8.2 × 10⁻³	4.1 × 10⁻²
SLC16A2	6567	P36021	-0.3	1.9 × 10⁻⁵	3.6 × 10⁻⁴
RAB6B	51560	Q9NRW1	-0.3	5.8 × 10⁻³	3.2 × 10⁻²
ABCD1	215	P33897	-0.3	1.2 × 10⁻⁷	5.4 × 10⁻⁶
SYNE1	23345	B4E3R1	-0.3	5.7 × 10⁻⁵	8.7 × 10⁻⁴
TMTC1	83857	Q8IUR5	-0.3	1.9 × 10⁻³	1.4 × 10⁻²
MINAR1	23251	Q9UPX6	-0.3	8.3 × 10⁻³	4.1 × 10⁻²
PLEKHA7	144100	E9PKC0	-0.3	1.1 × 10⁻²	4.9 × 10⁻²
LSR	51599	Q86X29	-0.3	2.3 × 10⁻³	1.6 × 10⁻²
RHOU	58480	A0A024R3Q7	-0.3	2.6 × 10⁻⁵	4.6 × 10⁻⁴
RASSF5	83593	A8K5F3	-0.3	1.6 × 10⁻⁴	2.0 × 10⁻³
SHISA2	387914	Q6UWI4	-0.3	3.3 × 10⁻⁵	5.6 × 10⁻⁴
KLF15	28999	Q9UIH9	-0.3	1.4 × 10⁻³	1.1 × 10⁻²
GSN	2934	P06396	-0.3	1.9 × 10⁻³	1.4 × 10⁻²
MAST4	375449	J3QT34	-0.3	8.3 × 10⁻³	4.1 × 10⁻²
APOL2	23780	A0A024R1M8	-0.3	1.3 × 10⁻³	1.0 × 10⁻²
ZMIZ1	57178	A0JLS3	-0.3	5.7 × 10⁻⁴	5.5 × 10⁻³
EFR3B	22979	B3KT90	-0.3	2.5 × 10⁻⁴	2.8 × 10⁻³
GAL	51083	P22466	-0.3	2.4 × 10⁻⁷	9.1 × 10⁻⁶
PIK3AP1	118788	Q6ZUJ8	-0.3	8.1 × 10⁻³	4.0 × 10⁻²
NECTIN1	5818	Q15223	-0.3	1.8 × 10⁻⁴	2.2 × 10⁻³
LMX1B	4010	B7ZLH2	-0.3	1.4 × 10⁻³	1.1 × 10⁻²
HERC5	51191	B4DXV3	-0.3	1.7 × 10⁻⁵	3.3 × 10⁻⁴
IRS2	8660	Q9P084	-0.3	9.6 × 10⁻³	4.5 × 10⁻²
COL4A2	1284	A0A024RDW8	-0.3	2.6 × 10⁻⁹	2.0 × 10⁻⁷
CA2	760	P00918	-0.3	6.0 × 10⁻⁸	3.0 × 10⁻⁶
TAP2	6891	Q03519	-0.3	9.1 × 10⁻⁸	4.3 × 10⁻⁶
MITF	4286	O75030	-0.3	2.6 × 10⁻³	1.8 × 10⁻²
FBN2	2201	P35556	-0.3	5.7 × 10⁻¹¹	8.1 × 10⁻⁹
NPAS1	4861	Q99742	-0.3	4.2 × 10⁻³	2.5 × 10⁻²
GPC1	2817	P35052	-0.3	3.4 × 10⁻⁴	3.7 × 10⁻³
KLHL29	114818	Q96CT2	-0.3	3.3 × 10⁻⁴	3.6 × 10⁻³
UCHL1	7345	P09936	-0.3	1.1 × 10⁻¹¹	2.0 × 10⁻⁹
GNG4	2786	B1APZ0	-0.3	3.7 × 10⁻⁴	3.9 × 10⁻³
GALNT13	114805	B3KY85	-0.3	9.8 × 10⁻⁵	1.3 × 10⁻³
LRP1	4035	Q07954	-0.3	5.4 × 10⁻⁴	5.3 × 10⁻³
CAMKV	79012	A0A024R331	-0.3	3.2 × 10⁻³	2.0 × 10⁻²
SPEG	10290	Q15772	-0.3	8.6 × 10⁻³	4.2 × 10⁻²
PLEKHG1	57480	Q5JYA6	-0.3	1.1 × 10⁻²	4.9 × 10⁻²
MZF1	7593	P28698	-0.3	6.3 × 10⁻³	3.4 × 10⁻²
ITGA2	3673	P17301	-0.3	2.4 × 10⁻³	1.7 × 10⁻²
DACT1	51339	Q9NYF0	-0.3	1.7 × 10⁻³	1.3 × 10⁻²
SLC10A7	84068	Q0GE19	-0.3	5.5 × 10⁻⁴	5.3 × 10⁻³
FBN1	2200	P35555	-0.3	6.0 × 10⁻⁴	5.7 × 10⁻³
KCNQ5	56479	Q9NR82	-0.3	2.5 × 10⁻³	1.7 × 10⁻²
HOOK1	51361	Q9UJC3	-0.3	4.0 × 10⁻⁷	1.4 × 10⁻⁵
ELK3	2004	A0A024RBE2	-0.3	1.7 × 10⁻³	1.3 × 10⁻²
FAM171B	165215	Q6P995	-0.3	3.6 × 10⁻⁵	5.9 × 10⁻⁴
MYLK	4638	Q05B97	-0.3	4.7 × 10⁻³	2.8 × 10⁻²
HTATIP2	10553	Q9BUP3	-0.3	2.7 × 10⁻⁴	3.0 × 10⁻³
PCGF5	84333	Q86SE9	-0.3	2.2 × 10⁻⁷	8.4 × 10⁻⁶
FBLIM1	54751	Q8WUP2	-0.3	9.3 × 10⁻³	4.4 × 10⁻²
GRIP1	23426	Q9Y3R0	-0.3	4.0 × 10⁻³	2.4 × 10⁻²
ZNF692	55657	Q9BU19	-0.3	4.4 × 10⁻³	2.6 × 10⁻²
ABTB2	25841	Q8N961	-0.3	1.6 × 10⁻³	1.2 × 10⁻²
EPS8	2059	B4E3T6	-0.3	7.2 × 10⁻⁵	1.0 × 10⁻³
ETNK2	55224	A0A024R976	-0.3	2.2 × 10⁻⁴	2.6 × 10⁻³
EN2	2020	P19622	-0.3	1.3 × 10⁻⁶	3.8 × 10⁻⁵
TNFRSF21	27242	A0A024RD71	-0.3	8.1 × 10⁻⁵	1.1 × 10⁻³
RGS16	6004	O15492	-0.3	5.6 × 10⁻³	3.1 × 10⁻²
PLCL2	23228	Q9UPR0	-0.3	5.9 × 10⁻⁵	8.9 × 10⁻⁴
PELI2	57161	Q9H716	-0.3	5.4 × 10⁻⁶	1.2 × 10⁻⁴
ZNF462	58499	Q63HJ5	-0.3	1.7 × 10⁻⁴	2.1 × 10⁻³
TAPBP	6892	A0A024RCT1	-0.3	3.7 × 10⁻³	2.3 × 10⁻²
NOXO1	124056	A8K832	-0.3	4.8 × 10⁻³	2.8 × 10⁻²
SDC4	6385	P31431	-0.3	3.8 × 10⁻³	2.4 × 10⁻²
CLU	1191	P10909	-0.3	4.9 × 10⁻³	2.8 × 10⁻²
SLC27A2	11001	O14975	-0.3	8.2 × 10⁻³	4.1 × 10⁻²
MKX	283078	Q8IYA7	-0.3	6.2 × 10⁻³	3.3 × 10⁻²
ST3GAL1	6482	A0A024R9L6	-0.3	9.0 × 10⁻⁴	7.9 × 10⁻³
FOXD1	2297	Q16676	-0.3	1.4 × 10⁻⁵	2.8 × 10⁻⁴
IL1RAP	3556	A8K6K4	-0.3	5.3 × 10⁻³	3.0 × 10⁻²
CD9	928	A6NNI4	-0.3	3.6 × 10⁻⁴	3.9 × 10⁻³
CLGN	1047	A0A140VKG2	-0.3	4.3 × 10⁻⁴	4.4 × 10⁻³
FLT4	2324	P35916	-0.3	5.5 × 10⁻⁷	1.8 × 10⁻⁵
SLC39A8	64116	A0A024RDG0	-0.3	1.3 × 10⁻⁷	5.7 × 10⁻⁶
TMCO6	55374	Q96DC7	-0.3	7.1 × 10⁻³	3.7 × 10⁻²
MOB3B	79817	Q86TA1	-0.3	5.8 × 10⁻³	3.2 × 10⁻²
RAB31	11031	Q13636	-0.3	2.1 × 10⁻⁶	5.5 × 10⁻⁵
CYB561	1534	B3KTA1	-0.3	5.9 × 10⁻³	3.2 × 10⁻²
EPB41L4B	54566	Q9H329	-0.3	1.0 × 10⁻³	8.7 × 10⁻³
B4GALNT4	338707	Q76KP1	-0.3	1.1 × 10⁻²	4.9 × 10⁻²
PHLDB2	90102	Q86SQ0	-0.3	5.8 × 10⁻⁴	5.5 × 10⁻³
CCDC71L	168455	Q8N9Z2	-0.3	6.1 × 10⁻⁴	5.7 × 10⁻³
SDK2	54549	Q58EX2	-0.3	5.4 × 10⁻⁴	5.3 × 10⁻³
SULF2	55959	Q8IWU5	-0.3	6.1 × 10⁻⁶	1.4 × 10⁻⁴
SLCO4A1	28231	Q96BD0	-0.3	2.2 × 10⁻³	1.5 × 10⁻²
TMEM170B	100113407	Q5T4T1	-0.3	2.9 × 10⁻⁶	7.2 × 10⁻⁵
GPR161	23432	Q8N6U8	-0.3	1.2 × 10⁻⁴	1.6 × 10⁻³
ACSL1	2180	A8K9T3	-0.2	9.1 × 10⁻⁵	1.3 × 10⁻³
RAPGEF5	9771	A8MQ07	-0.2	7.0 × 10⁻³	3.6 × 10⁻²
STX3	6809	Q13277	-0.2	2.7 × 10⁻⁴	3.1 × 10⁻³
HES6	55502	Q96HZ4	-0.2	7.0 × 10⁻⁴	6.4 × 10⁻³
LIFR	3977	A8K1Z4	-0.2	1.2 × 10⁻⁷	5.3 × 10⁻⁶
RPARP-AS1	100505761		-0.2	9.0 × 10⁻³	4.4 × 10⁻²
FAM229B	619208	Q4G0N7	-0.2	5.9 × 10⁻³	3.2 × 10⁻²
SNAI2	6591	O43623	-0.2	1.8 × 10⁻³	1.3 × 10⁻²
EGFL7	51162	A0A024R8F5	-0.2	8.6 × 10⁻³	4.2 × 10⁻²
ABHD14B	84836	Q96IU4	-0.2	7.7 × 10⁻⁴	6.9 × 10⁻³
B3GNT5	84002	Q9BYG0	-0.2	6.1 × 10⁻⁴	5.8 × 10⁻³
LAMC3	10319	Q8N2D6	-0.2	9.4 × 10⁻³	4.5 × 10⁻²
AHR	196	A0A024R9Z8	-0.2	1.4 × 10⁻⁴	1.9 × 10⁻³
SLC25A24	29957	Q6NUK1	-0.2	2.7 × 10⁻⁶	6.8 × 10⁻⁵
FAM107B	83641	Q9H098	-0.2	3.0 × 10⁻⁴	3.3 × 10⁻³
RAB15	376267	G5EMR8	-0.2	2.2 × 10⁻³	1.5 × 10⁻²
PODXL2	50512	Q9NZ53	-0.2	1.5 × 10⁻⁷	6.4 × 10⁻⁶
LPP	4026	B7ZLW0	-0.2	1.1 × 10⁻³	9.4 × 10⁻³
TRIB1	10221	Q96RU8	-0.2	8.4 × 10⁻⁷	2.6 × 10⁻⁵
GPRIN3	285513	Q6ZVF9	-0.2	1.7 × 10⁻³	1.3 × 10⁻²
PGM2L1	283209	Q6PCE3	-0.2	1.8 × 10⁻³	1.4 × 10⁻²
TSPAN5	10098	P62079	-0.2	4.8 × 10⁻⁴	4.8 × 10⁻³
RHOBTB1	9886	A0A024QZL4	-0.2	2.5 × 10⁻³	1.7 × 10⁻²
LPAR3	23566	Q9UBY5	-0.2	1.3 × 10⁻³	1.1 × 10⁻²
TUB	7275	P50607	-0.2	1.1 × 10⁻⁷	5.0 × 10⁻⁶
ENDOD1	23052	O94919	-0.2	1.9 × 10⁻⁴	2.3 × 10⁻³
C1orf115	79762	Q9H7X2	-0.2	8.4 × 10⁻⁴	7.4 × 10⁻³
RBM20	282996	Q5T481	-0.2	3.4 × 10⁻³	2.2 × 10⁻²
BRSK2	9024	Q8IWQ3	-0.2	1.7 × 10⁻³	1.3 × 10⁻²
OAF	220323	Q86UD1	-0.2	2.0 × 10⁻⁴	2.4 × 10⁻³
NCR3LG1	374383	Q68D85	-0.2	1.8 × 10⁻⁵	3.4 × 10⁻⁴
TAF1C	9013	Q15572	-0.2	6.1 × 10⁻⁴	5.8 × 10⁻³
ADGRB2	576	O60241	-0.2	5.8 × 10⁻³	3.2 × 10⁻²
OXCT1	5019	A0A024R040	-0.2	2.6 × 10⁻⁵	4.6 × 10⁻⁴
FJX1	24147	Q86VR8	-0.2	3.1 × 10⁻⁵	5.3 × 10⁻⁴
TENT5A	55603	Q96IP4	-0.2	3.1 × 10⁻³	2.0 × 10⁻²
LRATD2	157638	Q96KN1	-0.2	4.3 × 10⁻¹⁰	4.5 × 10⁻⁸
PFKFB2	5208	O60825	-0.2	3.2 × 10⁻⁴	3.5 × 10⁻³
COL4A6	1288	A8MXH5	-0.2	1.7 × 10⁻³	1.3 × 10⁻²
FIRRE	286467		-0.2	9.5 × 10⁻⁵	1.3 × 10⁻³
IQGAP2	10788	B7Z7U6	-0.2	2.4 × 10⁻⁵	4.2 × 10⁻⁴
SHROOM3	57619	B3KY47	-0.2	8.3 × 10⁻⁴	7.4 × 10⁻³
PCTP	58488	Q9UKL6	-0.2	1.3 × 10⁻³	1.0 × 10⁻²
LYST	1130	Q99698	-0.2	9.6 × 10⁻⁴	8.2 × 10⁻³
CD55	1604	P08174	-0.2	1.4 × 10⁻⁴	1.8 × 10⁻³
ZEB2	9839	O60315	-0.2	4.0 × 10⁻⁴	4.1 × 10⁻³
KHDRBS3	10656	O75525	-0.2	6.1 × 10⁻⁴	5.8 × 10⁻³
DUSP9	1852	Q6P9C2	-0.2	1.3 × 10⁻⁵	2.6 × 10⁻⁴
ADGRA2	25960	Q6YN44	-0.2	1.0 × 10⁻³	8.7 × 10⁻³
DXO	1797	A0A024RCW8	-0.2	5.5 × 10⁻³	3.1 × 10⁻²
GPR160	26996	Q9UJ42	-0.2	9.2 × 10⁻³	4.4 × 10⁻²
BIN1	274	A0A024RAG9	-0.2	9.9 × 10⁻⁴	8.4 × 10⁻³
MSRB3	253827	Q8IXL7	-0.2	3.7 × 10⁻³	2.3 × 10⁻²
STON2	85439	Q8WXE9	-0.2	7.6 × 10⁻⁵	1.1 × 10⁻³
MDFIC	29969	Q9P1T7	-0.2	3.5 × 10⁻⁴	3.7 × 10⁻³
INTS6L	203522	Q5JSJ4	-0.2	3.3 × 10⁻³	2.1 × 10⁻²
INSIG1	3638	A4D2M9	-0.2	4.1 × 10⁻⁷	1.4 × 10⁻⁵
PAG1	55824	Q9NWQ8	-0.2	4.6 × 10⁻⁵	7.2 × 10⁻⁴
GLA	2717	P06280	-0.2	4.6 × 10⁻⁸	2.4 × 10⁻⁶
FOXP4	116113	Q8IVH2	-0.2	1.0 × 10⁻²	4.7 × 10⁻²
PLAT	5327	P00750	-0.2	1.2 × 10⁻⁴	1.6 × 10⁻³
LINC02381	400043		-0.2	1.4 × 10⁻³	1.1 × 10⁻²
AKT3	10000	Q9Y243	-0.2	6.6 × 10⁻⁷	2.1 × 10⁻⁵
FLNC	2318	Q14315	-0.2	3.0 × 10⁻⁷	1.1 × 10⁻⁵
KBTBD11	9920	O94819	-0.2	1.2 × 10⁻³	9.9 × 10⁻³
PPARGC1B	133522	B7ZM40	-0.2	5.2 × 10⁻⁵	8.1 × 10⁻⁴
RIMS3	9783	Q9UJD0	-0.2	5.3 × 10⁻³	3.0 × 10⁻²
PNMA2	10687	Q5U5Z3	-0.2	9.8 × 10⁻⁴	8.3 × 10⁻³
POLR1G	10849	O15446	-0.2	7.8 × 10⁻³	3.9 × 10⁻²
KIF1A	547	Q12756	-0.2	3.8 × 10⁻⁵	6.1 × 10⁻⁴
TLCD4	148534	Q96MV1	-0.2	7.4 × 10⁻⁴	6.7 × 10⁻³
SREBF1	6720	P36956	-0.2	3.1 × 10⁻⁴	3.4 × 10⁻³
PRKG1	5592	Q13976	-0.2	7.9 × 10⁻³	3.9 × 10⁻²
ANKH	56172	Q9HCJ1	-0.2	1.2 × 10⁻³	9.6 × 10⁻³
DSC2	1824	Q02487	-0.2	6.0 × 10⁻⁵	9.0 × 10⁻⁴
STEAP3	55240	A0A024RAD7	-0.2	4.6 × 10⁻⁵	7.3 × 10⁻⁴
IGSF3	3321	O75054	-0.2	4.3 × 10⁻⁵	6.9 × 10⁻⁴
ARHGAP32	9743	A7KAX9	-0.2	7.5 × 10⁻³	3.8 × 10⁻²
SNRPA1	6627	P09661	-0.2	3.5 × 10⁻⁶	8.5 × 10⁻⁵
ELAVL2	1993	Q12926	-0.2	9.6 × 10⁻⁴	8.2 × 10⁻³
MIR17HG	407975		-0.2	2.2 × 10⁻⁴	2.6 × 10⁻³
TBC1D1	23216	Q86TI0	-0.2	6.0 × 10⁻⁵	9.0 × 10⁻⁴
TSPAN7	7102	P41732	-0.2	6.3 × 10⁻³	3.4 × 10⁻²
NFXL1	152518	B1Q2B0	-0.2	9.6 × 10⁻⁴	8.2 × 10⁻³
BEX2	84707	Q9BXY8	-0.2	2.8 × 10⁻³	1.9 × 10⁻²
GLB1L2	89944	A0A024R3N9	-0.2	9.1 × 10⁻⁴	7.9 × 10⁻³
PTPN3	5774	B7Z9V1	-0.2	2.0 × 10⁻³	1.5 × 10⁻²
ADORA2B	136	P29275	-0.2	7.1 × 10⁻³	3.7 × 10⁻²
IDS	3423	P22304	-0.2	3.2 × 10⁻⁴	3.5 × 10⁻³
HS6ST1	9394	O60243	-0.2	1.7 × 10⁻⁴	2.1 × 10⁻³
JPH1	56704	Q7Z682	-0.2	7.4 × 10⁻³	3.8 × 10⁻²
POU3F3	5455	P20264	-0.2	3.8 × 10⁻⁵	6.2 × 10⁻⁴
CELF2	10659	O95319	-0.2	1.2 × 10⁻³	9.7 × 10⁻³
KLHL17	339451	Q6TDP4	-0.2	1.0 × 10⁻²	4.8 × 10⁻²
MAPKAPK5-AS1	51275		-0.2	1.0 × 10⁻²	4.7 × 10⁻²
HIVEP2	3097	P31629	-0.2	2.1 × 10⁻³	1.5 × 10⁻²
NDRG1	10397	Q92597	-0.2	5.7 × 10⁻⁵	8.7 × 10⁻⁴
EEF1A2	1917	Q05639	-0.2	9.5 × 10⁻⁵	1.3 × 10⁻³
PER1	5187	O15534	-0.2	1.4 × 10⁻³	1.1 × 10⁻²
QPCTL	54814	Q9NXS2	-0.2	9.2 × 10⁻³	4.4 × 10⁻²
ANK3	288	Q12955	-0.2	9.2 × 10⁻³	4.4 × 10⁻²
PFKP	5214	Q01813	-0.2	1.0 × 10⁻⁵	2.1 × 10⁻⁴
MYC	4609	A0A087WVR4	-0.2	8.1 × 10⁻⁶	1.7 × 10⁻⁴
CDK6	1021	Q00534	-0.2	1.5 × 10⁻⁷	6.1 × 10⁻⁶
LRRC8D	55144	B3KRU1	-0.2	1.6 × 10⁻³	1.2 × 10⁻²
TSPYL2	64061	Q9H2G4	-0.2	4.9 × 10⁻³	2.8 × 10⁻²
KLF16	83855	Q9BXK1	-0.2	4.8 × 10⁻³	2.8 × 10⁻²
TRIM65	201292	Q6PJ69	-0.2	3.3 × 10⁻⁵	5.5 × 10⁻⁴
ALX4	60529	Q9H161	-0.2	2.8 × 10⁻³	1.9 × 10⁻²
HLA-C	3107	O19617	-0.2	2.2 × 10⁻⁶	5.9 × 10⁻⁵
MAP1A	4130	P78559	-0.2	6.8 × 10⁻⁴	6.3 × 10⁻³
IFIT5	24138	Q13325	-0.2	1.0 × 10⁻²	4.7 × 10⁻²
ACSL4	2182	O60488	-0.2	4.8 × 10⁻⁶	1.1 × 10⁻⁴
MET	4233	A0A024R759	-0.2	1.5 × 10⁻⁵	3.0 × 10⁻⁴
YOD1	55432	Q5VVQ6	-0.2	8.0 × 10⁻⁶	1.7 × 10⁻⁴
SRRM2	23524	A0A140VK53	-0.2	1.1 × 10⁻⁶	3.2 × 10⁻⁵
SRPRA	6734	P08240	-0.2	7.8 × 10⁻⁴	7.0 × 10⁻³
KIRREL1	55243	Q96J84	-0.2	1.7 × 10⁻⁴	2.2 × 10⁻³
IGF1R	3480	P08069	-0.2	1.4 × 10⁻⁵	2.7 × 10⁻⁴
RAB32	10981	Q13637	-0.2	5.2 × 10⁻³	3.0 × 10⁻²
DIAPH1	1729	O60610	-0.2	6.7 × 10⁻⁶	1.5 × 10⁻⁴
WDR91	29062	A4D1P6	-0.2	4.1 × 10⁻³	2.5 × 10⁻²
RAB11FIP4	84440	Q86YS3	-0.2	6.2 × 10⁻⁴	5.8 × 10⁻³
AHI1	54806	Q8N157	-0.2	8.2 × 10⁻³	4.1 × 10⁻²
KIN	22944	O60870	-0.2	1.0 × 10⁻²	4.8 × 10⁻²
COA6	388753	Q5JTJ3	-0.2	4.3 × 10⁻³	2.6 × 10⁻²
ZIC3	7547	O60481	-0.2	8.4 × 10⁻³	4.1 × 10⁻²
F11R	50848	Q9Y624	-0.2	5.7 × 10⁻³	3.2 × 10⁻²
CTSL	1514	A0A024R276	-0.2	7.3 × 10⁻⁴	6.7 × 10⁻³
SNHG3	8420		-0.2	3.7 × 10⁻³	2.3 × 10⁻²
BMAL2	56938	Q8WYA1	-0.2	2.1 × 10⁻³	1.5 × 10⁻²
CACNA1H	8912	B3KQH9	-0.2	8.7 × 10⁻⁴	7.6 × 10⁻³
MFSD3	113655	Q96ES6	-0.2	1.3 × 10⁻³	1.0 × 10⁻²
RNF125	54941	Q96EQ8	-0.2	2.2 × 10⁻³	1.5 × 10⁻²
MFHAS1	9258	Q9Y4C4	-0.2	2.8 × 10⁻³	1.8 × 10⁻²
CEMIP2	23670	Q9UHN6	-0.2	5.0 × 10⁻³	2.9 × 10⁻²
TRAM2	9697	A0A024RD84	-0.2	7.5 × 10⁻³	3.8 × 10⁻²
H2AC4	8335	P04908	-0.2	9.9 × 10⁻⁶	2.1 × 10⁻⁴
GALNT2	2590	B7Z6K2	-0.2	9.7 × 10⁻⁶	2.0 × 10⁻⁴
SNHG15	285958		-0.2	1.0 × 10⁻²	4.8 × 10⁻²
ITGB5	3693	L7RT22	-0.2	5.5 × 10⁻³	3.1 × 10⁻²
TNIK	23043	Q9UKE5	-0.2	4.1 × 10⁻⁴	4.2 × 10⁻³
RELL1	768211	Q8IUW5	-0.2	5.4 × 10⁻³	3.0 × 10⁻²
CTSB	1508	Q5HYG5	-0.2	9.0 × 10⁻⁴	7.9 × 10⁻³
ZNF783	100289678	Q6ZMS7	-0.2	6.2 × 10⁻³	3.4 × 10⁻²
TJP2	9414	B7Z2R3	-0.2	6.1 × 10⁻⁴	5.8 × 10⁻³
CCND2	894	P30279	-0.2	1.1 × 10⁻⁶	3.3 × 10⁻⁵
CHST3	9469	Q7LGC8	-0.2	9.5 × 10⁻³	4.5 × 10⁻²
C1orf21	81563	A0A024R926	-0.2	3.4 × 10⁻³	2.1 × 10⁻²
SMYD2	56950	Q9NRG4	-0.2	1.6 × 10⁻³	1.2 × 10⁻²
KIF26A	26153	Q9ULI4	-0.2	5.6 × 10⁻⁴	5.4 × 10⁻³
POU4F1	5457	Q01851	-0.2	5.3 × 10⁻⁴	5.2 × 10⁻³
GAREM1	64762	Q9H706	-0.2	8.9 × 10⁻³	4.3 × 10⁻²
EMP2	2013	P54851	-0.2	1.9 × 10⁻³	1.4 × 10⁻²
TMEM98	26022	Q9Y2Y6	-0.2	5.0 × 10⁻³	2.9 × 10⁻²
MATK	4145	P42679	-0.2	9.9 × 10⁻³	4.6 × 10⁻²
MRPS18B	28973	B0S7P4	-0.2	2.6 × 10⁻⁴	3.0 × 10⁻³
CELSR2	1952	Q9HCU4	-0.2	4.3 × 10⁻³	2.6 × 10⁻²
AMMECR1	9949	A0A0S2Z4V0	-0.2	5.3 × 10⁻⁴	5.2 × 10⁻³
SRM	6723	P19623	-0.2	9.0 × 10⁻³	4.4 × 10⁻²
CHRAC1	54108	Q9NRG0	-0.2	4.8 × 10⁻³	2.8 × 10⁻²
KLC2	64837	Q9H0B6	-0.2	3.2 × 10⁻³	2.1 × 10⁻²
ZNF395	55893	Q7L9C8	-0.2	5.4 × 10⁻³	3.0 × 10⁻²
QSOX1	5768	A0A140VKE5	-0.2	6.9 × 10⁻³	3.6 × 10⁻²
MANEAL	149175	Q5VSG8	-0.2	1.1 × 10⁻²	4.9 × 10⁻²
SLC6A6	6533	A0A087WY96	-0.2	5.3 × 10⁻³	3.0 × 10⁻²
TRMT2A	27037	Q8IZ69	-0.2	9.2 × 10⁻⁴	8.0 × 10⁻³
SV2A	9900	B4E000	-0.2	6.5 × 10⁻³	3.4 × 10⁻²
HNRNPH1	3187	P31943	-0.2	2.3 × 10⁻⁸	1.4 × 10⁻⁶
PSEN2	5664	P49810	-0.2	1.1 × 10⁻²	4.9 × 10⁻²
BMP7	655	A8K571	-0.2	3.3 × 10⁻³	2.1 × 10⁻²
GNL3L	54552	A0A024R9Y6	-0.2	1.3 × 10⁻⁵	2.7 × 10⁻⁴
MYO1D	4642	J3QRN6	-0.1	5.8 × 10⁻³	3.2 × 10⁻²
PPIF	10105	A0A024QZS4	-0.1	1.3 × 10⁻⁴	1.7 × 10⁻³
ZNF703	80139	Q9H7S9	-0.1	5.6 × 10⁻⁴	5.4 × 10⁻³
TPD52L1	7164	Q15730	-0.1	6.5 × 10⁻³	3.5 × 10⁻²
KMT2D	8085	O14686	-0.1	6.6 × 10⁻³	3.5 × 10⁻²
RFK	55312	B2RDZ2	-0.1	7.9 × 10⁻⁴	7.1 × 10⁻³
TAGLN2	8407	P37802	-0.1	3.6 × 10⁻⁴	3.9 × 10⁻³
UCHL5	51377	Q9Y5K5	-0.1	6.8 × 10⁻⁴	6.2 × 10⁻³
MRPL50	54534	Q8N5N7	-0.1	8.4 × 10⁻³	4.1 × 10⁻²
MYBBP1A	10514	Q9BQG0	-0.1	1.4 × 10⁻⁵	2.8 × 10⁻⁴
LRRFIP1	9208	Q32MZ4	-0.1	8.9 × 10⁻⁴	7.7 × 10⁻³
TMEM177	80775	Q53S58	-0.1	9.6 × 10⁻³	4.5 × 10⁻²
GNG12	55970	Q9UBI6	-0.1	9.5 × 10⁻⁴	8.2 × 10⁻³
PAPSS1	9061	O43252	-0.1	3.0 × 10⁻³	1.9 × 10⁻²
H2BC26	128312	Q8N257	-0.1	2.1 × 10⁻⁵	3.8 × 10⁻⁴
POLR2A	5430	P24928	-0.1	9.7 × 10⁻³	4.6 × 10⁻²
SAFB2	9667	Q14151	-0.1	1.4 × 10⁻³	1.1 × 10⁻²
CHML	1122	P26374	-0.1	3.4 × 10⁻⁵	5.7 × 10⁻⁴
NAT8L	339983	Q8N9F0	-0.1	3.1 × 10⁻³	2.0 × 10⁻²
TSC22D3	1831	Q5JRJ2	-0.1	6.2 × 10⁻⁴	5.8 × 10⁻³
FAM83D	81610	Q9H4H8	-0.1	5.0 × 10⁻³	2.9 × 10⁻²
TBL1X	6907	A0A024RBV9	-0.1	1.7 × 10⁻³	1.3 × 10⁻²
THAP7	80764	Q9BT49	-0.1	8.2 × 10⁻³	4.1 × 10⁻²
RNF126	55658	A0A024R206	-0.1	2.7 × 10⁻³	1.8 × 10⁻²
C15orf39	56905	Q6ZRI6	-0.1	6.7 × 10⁻³	3.5 × 10⁻²
TMEM201	199953	Q5SNT2	-0.1	8.9 × 10⁻³	4.3 × 10⁻²
NEO1	4756	Q59FP8	-0.1	3.8 × 10⁻³	2.3 × 10⁻²
DENND11	57189	A4D1U4	-0.1	3.0 × 10⁻⁴	3.4 × 10⁻³
ATG9A	79065	A0A024R438	-0.1	1.3 × 10⁻³	1.0 × 10⁻²
ZYX	7791	Q15942	-0.1	1.1 × 10⁻²	5.0 × 10⁻²
ACO1	48	P21399	-0.1	2.4 × 10⁻³	1.7 × 10⁻²
PTPN14	5784	A8K6H6	-0.1	5.3 × 10⁻³	3.0 × 10⁻²
GTPBP4	23560	D2CFK9	-0.1	1.8 × 10⁻⁴	2.2 × 10⁻³
DFFA	1676	O00273	-0.1	4.0 × 10⁻⁴	4.2 × 10⁻³
ITGB3BP	23421	Q13352	-0.1	6.7 × 10⁻³	3.5 × 10⁻²
MDC1	9656	A0A1U9XBC1	-0.1	3.8 × 10⁻³	2.4 × 10⁻²
SLC7A5	8140	Q01650	-0.1	4.6 × 10⁻⁵	7.3 × 10⁻⁴
TCFL5	10732	Q86TP4	-0.1	7.4 × 10⁻³	3.8 × 10⁻²
TLNRD1	59274	Q9H1K6	-0.1	1.0 × 10⁻²	4.8 × 10⁻²
FRAT2	23401	O75474	-0.1	6.2 × 10⁻³	3.3 × 10⁻²
ESCO1	114799	A0A024RC19	-0.1	5.1 × 10⁻³	2.9 × 10⁻²
RNF187	149603	Q5TA31	-0.1	2.7 × 10⁻⁴	3.1 × 10⁻³
SLC38A1	81539	A0A024R124	-0.1	5.3 × 10⁻⁵	8.1 × 10⁻⁴
EXO1	9156	A8K5H6	-0.1	2.9 × 10⁻⁴	3.2 × 10⁻³
DIPK1B	138311	Q5VUD6	-0.1	4.5 × 10⁻³	2.7 × 10⁻²
CAD	790	F8VPD4	-0.1	4.5 × 10⁻⁴	4.5 × 10⁻³
AARS1	16	P49588	-0.1	7.6 × 10⁻⁵	1.1 × 10⁻³
RBMS1	5937	A0A0S2Z499	-0.1	5.4 × 10⁻³	3.0 × 10⁻²
PRRC2A	7916	A0A1U9X974	-0.1	6.1 × 10⁻⁵	9.1 × 10⁻⁴
SMPD4	55627	Q9NXE4	-0.1	9.8 × 10⁻⁴	8.3 × 10⁻³
UBR4	23352	Q5T4S7	-0.1	4.3 × 10⁻⁴	4.3 × 10⁻³
AKAP12	9590	Q02952	-0.1	1.5 × 10⁻⁴	1.9 × 10⁻³
HEATR3	55027	Q7Z4Q2	-0.1	3.0 × 10⁻³	1.9 × 10⁻²
B3GALT6	126792	Q96L58	-0.1	9.6 × 10⁻³	4.5 × 10⁻²
RBBP7	5931	Q16576	-0.1	1.8 × 10⁻⁵	3.4 × 10⁻⁴
NOL9	79707	Q5SY16	-0.1	6.3 × 10⁻⁴	5.9 × 10⁻³
ATAD3A	55210	Q9NVI7	-0.1	1.8 × 10⁻³	1.4 × 10⁻²
RAI14	26064	Q9P0K7	-0.1	1.6 × 10⁻³	1.2 × 10⁻²
DSE	29940	Q9UL01	-0.1	7.9 × 10⁻³	4.0 × 10⁻²
SUPT5H	6829	O00267	-0.1	9.9 × 10⁻⁴	8.4 × 10⁻³
DANCR	57291		-0.1	6.8 × 10⁻³	3.6 × 10⁻²
BEX4	56271	Q9NWD9	-0.1	9.7 × 10⁻³	4.6 × 10⁻²
C1orf109	54955	B4DRQ5	-0.1	7.7 × 10⁻³	3.9 × 10⁻²
GTF3C4	9329	B3KNH2	-0.1	2.9 × 10⁻³	1.9 × 10⁻²
IRAK1	3654	P51617	-0.1	3.9 × 10⁻⁵	6.3 × 10⁻⁴
MAT2A	4144	A0A140VJP5	-0.1	3.2 × 10⁻⁴	3.5 × 10⁻³
AUP1	550	Q9Y679	-0.1	7.0 × 10⁻³	3.6 × 10⁻²
SACS	26278	Q9NZJ4	-0.1	4.3 × 10⁻⁴	4.4 × 10⁻³
GUF1	60558	A0A024R9T3	-0.1	4.6 × 10⁻³	2.7 × 10⁻²
BCS1L	617	A0A024R467	-0.1	9.9 × 10⁻³	4.6 × 10⁻²
EIF4G1	1981	B2RU06	-0.1	1.3 × 10⁻⁶	3.6 × 10⁻⁵
TCOF1	6949	Q13428	-0.1	1.3 × 10⁻⁴	1.7 × 10⁻³
ENPP1	5167	P22413	-0.1	6.7 × 10⁻³	3.5 × 10⁻²
HMGXB3	22993	Q12766	-0.1	2.7 × 10⁻³	1.8 × 10⁻²
RNF220	55182	Q5VTB9	-0.1	9.4 × 10⁻³	4.5 × 10⁻²
PNPT1	87178	Q8TCS8	-0.1	3.1 × 10⁻³	2.0 × 10⁻²
DGKZ	8525	Q13574	-0.1	6.3 × 10⁻³	3.4 × 10⁻²
ALYREF	10189	E9PB61	-0.1	1.2 × 10⁻³	9.7 × 10⁻³
H3C13	653604	Q71DI3	-0.1	3.8 × 10⁻⁴	4.0 × 10⁻³
PRPS2	5634	A0A140VK41	-0.1	3.1 × 10⁻³	2.0 × 10⁻²
ZNF598	90850	Q86UK7	-0.1	9.9 × 10⁻³	4.6 × 10⁻²
NRDC	4898	O43847	-0.1	2.1 × 10⁻³	1.5 × 10⁻²
RCC2	55920	A0A024RAC5	-0.1	1.5 × 10⁻⁴	1.9 × 10⁻³
ACTG1	71	P63261	-0.1	1.0 × 10⁻⁶	3.1 × 10⁻⁵
C19orf48	84798	A0A024R4G9	-0.1	4.2 × 10⁻³	2.5 × 10⁻²
MAN1A1	4121	P33908	-0.1	5.5 × 10⁻³	3.1 × 10⁻²
H4C11	121504	B2R4R0	-0.1	6.0 × 10⁻³	3.3 × 10⁻²
MRPS5	64969	P82675	-0.1	9.8 × 10⁻³	4.6 × 10⁻²
TSR1	55720	Q2NL82	-0.1	1.8 × 10⁻³	1.4 × 10⁻²
YDJC	150223	A8MPS7	-0.1	3.1 × 10⁻³	2.0 × 10⁻²
H2AC15	8332	A4FTV9	-0.1	4.7 × 10⁻³	2.7 × 10⁻²
H2AC25	92815	Q7L7L0	-0.1	2.2 × 10⁻³	1.5 × 10⁻²
PERP	64065	Q96FX8	-0.1	9.0 × 10⁻³	4.4 × 10⁻²
GEMIN5	25929	B7ZLC9	-0.1	1.9 × 10⁻³	1.4 × 10⁻²
WDR77	79084	Q9BQA1	-0.1	9.6 × 10⁻⁴	8.2 × 10⁻³
DDX27	55661	Q96GQ7	-0.1	9.0 × 10⁻³	4.3 × 10⁻²
HUWE1	10075	A0A024R9W5	-0.1	3.0 × 10⁻⁴	3.3 × 10⁻³
HDGF	3068	P51858	-0.1	3.7 × 10⁻⁴	3.9 × 10⁻³
CBX6	23466	B0QXZ6	-0.1	4.8 × 10⁻⁴	4.8 × 10⁻³
URB2	9816	Q14146	-0.1	2.2 × 10⁻³	1.6 × 10⁻²
TIMM17A	10440	Q99595	-0.1	2.6 × 10⁻³	1.8 × 10⁻²
LRRC58	116064	Q96CX6	-0.1	2.7 × 10⁻³	1.8 × 10⁻²
GNB1	2782	B3KVK2	-0.1	6.0 × 10⁻³	3.3 × 10⁻²
GPI	2821	P06744	-0.1	4.1 × 10⁻⁴	4.2 × 10⁻³
ZRANB2	9406	O95218	-0.1	2.8 × 10⁻³	1.9 × 10⁻²
SSX2IP	117178	Q9Y2D8	-0.1	1.0 × 10⁻²	4.8 × 10⁻²
BROX	148362	Q5VW32	-0.1	7.1 × 10⁻³	3.7 × 10⁻²
ELAC2	60528	Q9BQ52	-0.1	2.4 × 10⁻³	1.6 × 10⁻²
MAP7D3	79649	Q8IWC1	-0.1	7.6 × 10⁻³	3.8 × 10⁻²
SLC6A8	6535	P48029	-0.1	1.1 × 10⁻²	4.9 × 10⁻²
FASN	2194	P49327	-0.1	2.1 × 10⁻⁴	2.5 × 10⁻³
HIST2H2AC	8338	Q16777	-0.1	3.4 × 10⁻⁴	3.7 × 10⁻³
SSR3	6747	Q9UNL2	-0.1	1.9 × 10⁻³	1.4 × 10⁻²
PRRC2C	23215	Q9Y520	-0.1	9.8 × 10⁻⁴	8.4 × 10⁻³
PTGFRN	5738	Q9P2B2	-0.1	1.1 × 10⁻²	4.8 × 10⁻²
SLC7A1	6541	A0A024RDQ9	-0.1	9.8 × 10⁻³	4.6 × 10⁻²
TRIM28	10155	Q13263	-0.1	3.2 × 10⁻³	2.1 × 10⁻²
POLR1B	84172	Q9H9Y6	-0.1	7.9 × 10⁻³	4.0 × 10⁻²
PGRMC1	10857	O00264	-0.1	9.4 × 10⁻⁴	8.1 × 10⁻³
CLUH	23277	O75153	-0.1	3.8 × 10⁻³	2.4 × 10⁻²
MAGED1	9500	Q9Y5V3	-0.1	5.7 × 10⁻³	3.1 × 10⁻²
TFRC	7037	P02786	-0.1	2.8 × 10⁻³	1.9 × 10⁻²
WDR3	10885	Q5TDG3	-0.1	8.3 × 10⁻³	4.1 × 10⁻²
SLC39A10	57181	A0A024R3W5	-0.1	1.0 × 10⁻²	4.7 × 10⁻²
NUP155	9631	B4DLT2	-0.1	3.0 × 10⁻³	1.9 × 10⁻²
ATP1A1	476	P05023	-0.1	7.9 × 10⁻⁴	7.0 × 10⁻³
H2BC18	440689	Q5QNW6	-0.1	1.4 × 10⁻³	1.1 × 10⁻²
PLEC	5339	Q15149	-0.1	9.7 × 10⁻³	4.6 × 10⁻²
VIM	7431	P08670	-0.1	4.4 × 10⁻³	2.6 × 10⁻²
U2SURP	23350	O15042	-0.1	3.8 × 10⁻³	2.3 × 10⁻²
NOLC1	9221	B2RAU8	-0.1	2.3 × 10⁻³	1.6 × 10⁻²
MIEF1	54471	B0QY95	-0.1	8.8 × 10⁻³	4.3 × 10⁻²
FLNA	2316	P21333	-0.1	5.2 × 10⁻⁴	5.1 × 10⁻³
HIST2H2BE	8349	Q16778	-0.1	2.2 × 10⁻³	1.6 × 10⁻²
ATP5MC3	518	P48201	-0.1	4.5 × 10⁻³	2.6 × 10⁻²
CDV3	55573	Q9UKY7	-0.1	4.1 × 10⁻³	2.5 × 10⁻²
NPM1	4869	A0A140VJQ2	-0.1	1.5 × 10⁻⁴	1.9 × 10⁻³
AK2	204	P54819	-0.1	7.0 × 10⁻³	3.6 × 10⁻²
EPRS1	2058	P07814	-0.1	3.0 × 10⁻³	1.9 × 10⁻²
SCD	6319	O00767	-0.1	2.0 × 10⁻³	1.5 × 10⁻²
HSP90AB1	3326	A0A024RD80	-0.1	1.2 × 10⁻³	9.9 × 10⁻³
GLUL	2752	A8YXX4	-0.1	6.4 × 10⁻³	3.4 × 10⁻²
GLO1	2739	Q04760	-0.1	5.2 × 10⁻³	3.0 × 10⁻²
HNRNPU	3192	Q00839	-0.1	1.0 × 10⁻²	4.7 × 10⁻²
EEF1A1	1915	P68104	0.1	7.4 × 10⁻⁴	6.7 × 10⁻³
RPL29	6159	P47914	0.1	9.9 × 10⁻³	4.6 × 10⁻²
UBC	7316	P0CG48	0.1	8.5 × 10⁻³	4.2 × 10⁻²
PRDX6	9588	P30041	0.1	1.0 × 10⁻²	4.7 × 10⁻²
HACD3	51495	Q9P035	0.1	8.3 × 10⁻³	4.1 × 10⁻²
GSTP1	2950	P09211	0.1	9.4 × 10⁻³	4.5 × 10⁻²
HMGN2	3151	P05204	0.1	2.8 × 10⁻³	1.9 × 10⁻²
RHOA	387	A0A024R324	0.1	4.7 × 10⁻³	2.8 × 10⁻²
HDLBP	3069	Q00341	0.1	2.0 × 10⁻³	1.4 × 10⁻²
TBC1D4	9882	O60343	0.1	9.0 × 10⁻³	4.4 × 10⁻²
PSAP	5660	P07602	0.1	5.3 × 10⁻³	3.0 × 10⁻²
YWHAQ	10971	P27348	0.1	3.0 × 10⁻³	1.9 × 10⁻²
RPS20	6224	P60866	0.1	2.8 × 10⁻³	1.8 × 10⁻²
DHFR	1719	B0YJ76	0.1	4.4 × 10⁻³	2.6 × 10⁻²
CKAP5	9793	Q14008	0.1	2.0 × 10⁻³	1.5 × 10⁻²
RBM39	9584	Q14498	0.1	4.3 × 10⁻³	2.6 × 10⁻²
VPS35	55737	Q96QK1	0.1	1.0 × 10⁻²	4.7 × 10⁻²
KDELR2	11014	P33947	0.1	7.8 × 10⁻³	3.9 × 10⁻²
RABL6	55684	H0Y4Z8	0.1	6.8 × 10⁻³	3.5 × 10⁻²
GLUD1	2746	P00367	0.1	4.6 × 10⁻³	2.7 × 10⁻²
MDM2	4193	A0A0A8KB75	0.1	5.6 × 10⁻³	3.1 × 10⁻²
TPX2	22974	Q643R0	0.1	8.1 × 10⁻³	4.0 × 10⁻²
TTC3	7267	P53804	0.1	8.1 × 10⁻³	4.1 × 10⁻²
ACVR2B	93	Q13705	0.1	9.3 × 10⁻³	4.4 × 10⁻²
RPL30	6156	A0A024R9D3	0.1	1.5 × 10⁻³	1.1 × 10⁻²
HMGN1	3150	P05114	0.1	1.7 × 10⁻³	1.3 × 10⁻²
HMGA1	3159	P17096	0.1	4.9 × 10⁻³	2.8 × 10⁻²
RBM15B	29890	Q8NDT2	0.1	8.9 × 10⁻³	4.3 × 10⁻²
APLP2	334	A0A140VJE9	0.1	1.0 × 10⁻³	8.5 × 10⁻³
KTN1	3895	A0A024R663	0.1	3.6 × 10⁻³	2.2 × 10⁻²
CRKL	1399	P46109	0.1	2.4 × 10⁻³	1.7 × 10⁻²
EPB41	2035	P11171	0.1	6.1 × 10⁻³	3.3 × 10⁻²
CPNE3	8895	A0A024R994	0.1	5.1 × 10⁻³	2.9 × 10⁻²
FAM20B	9917	A0A024R918	0.1	1.1 × 10⁻²	4.9 × 10⁻²
XRN2	22803	B4DZC3	0.1	4.3 × 10⁻³	2.6 × 10⁻²
HMGB2	3148	P26583	0.1	5.3 × 10⁻³	3.0 × 10⁻²
PPP4C	5531	A0A024R625	0.1	9.3 × 10⁻³	4.4 × 10⁻²
ABCB10	23456	Q9NRK6	0.1	9.8 × 10⁻³	4.6 × 10⁻²
ZNF638	27332	Q14966	0.1	3.5 × 10⁻³	2.2 × 10⁻²
JPT2	90861	Q9H910	0.1	2.9 × 10⁻³	1.9 × 10⁻²
FLNB	2317	O75369	0.1	2.3 × 10⁻³	1.6 × 10⁻²
ADI1	55256	Q9BV57	0.1	1.1 × 10⁻²	5.0 × 10⁻²
TMED10	10972	A0A024R6I3	0.1	2.2 × 10⁻³	1.6 × 10⁻²
TSPAN6	7105	A0A024RCI0	0.1	9.7 × 10⁻³	4.6 × 10⁻²
CPD	1362	O75976	0.1	2.1 × 10⁻³	1.5 × 10⁻²
YWHAG	7532	P61981	0.1	3.3 × 10⁻³	2.1 × 10⁻²
YWHAH	7533	A0A024R1K7	0.1	7.5 × 10⁻³	3.8 × 10⁻²
CLASP2	23122	O75122	0.1	4.8 × 10⁻³	2.8 × 10⁻²
CSNK2A1	1457	P68400	0.1	3.5 × 10⁻³	2.2 × 10⁻²
MED13L	23389	Q71F56	0.1	1.1 × 10⁻²	4.9 × 10⁻²
MLF2	8079	A8K1F4	0.1	9.2 × 10⁻³	4.4 × 10⁻²
EEF1D	1936	B2RAR6	0.1	1.1 × 10⁻³	8.8 × 10⁻³
WTAP	9589	Q15007	0.1	6.4 × 10⁻³	3.4 × 10⁻²
MYL6	4637	P60660	0.1	2.7 × 10⁻³	1.8 × 10⁻²
SNRPG	6637	C9JVQ0	0.1	7.5 × 10⁻³	3.8 × 10⁻²
CACUL1	143384	Q86Y37	0.1	6.3 × 10⁻³	3.4 × 10⁻²
IPO7	10527	B3KNG9	0.1	2.5 × 10⁻³	1.7 × 10⁻²
H2AX	3014	P16104	0.1	5.6 × 10⁻³	3.1 × 10⁻²
TSPAN3	10099	O60637	0.1	6.4 × 10⁻⁴	5.9 × 10⁻³
ALCAM	214	Q13740	0.1	9.1 × 10⁻³	4.4 × 10⁻²
TMED2	10959	Q15363	0.1	8.1 × 10⁻⁴	7.2 × 10⁻³
GNB2	2783	P62879	0.1	7.2 × 10⁻³	3.7 × 10⁻²
FTL	2512	P02792	0.1	3.9 × 10⁻³	2.4 × 10⁻²
STAU1	6780	B3KRE0	0.1	3.7 × 10⁻³	2.3 × 10⁻²
RAB1A	5861	P62820	0.1	4.1 × 10⁻³	2.5 × 10⁻²
HNRNPA0	10949	Q13151	0.1	7.6 × 10⁻³	3.8 × 10⁻²
KIF23	9493	Q02241	0.1	6.6 × 10⁻³	3.5 × 10⁻²
YAP1	10413	P46937	0.1	8.0 × 10⁻³	4.0 × 10⁻²
EIF2AK1	27102	Q9BQI3	0.1	2.4 × 10⁻³	1.6 × 10⁻²
DCP2	167227	Q8IU60	0.1	1.7 × 10⁻³	1.3 × 10⁻²
H2AZ2	94239	Q71UI9	0.1	2.4 × 10⁻³	1.6 × 10⁻²
CD59	966	P13987	0.1	1.0 × 10⁻²	4.7 × 10⁻²
SEL1L	6400	Q9UBV2	0.1	1.1 × 10⁻²	5.0 × 10⁻²
TIA1	7072	P31483	0.1	8.8 × 10⁻³	4.3 × 10⁻²
DDX6	1656	B2R858	0.1	1.4 × 10⁻³	1.1 × 10⁻²
HSPA1B	3304	A8K5I0	0.1	4.5 × 10⁻⁵	7.2 × 10⁻⁴
NNT	23530	E9PCX7	0.1	7.2 × 10⁻³	3.7 × 10⁻²
SEC11A	23478	P67812	0.1	9.8 × 10⁻³	4.6 × 10⁻²
NUP210	23225	Q8TEM1	0.1	1.5 × 10⁻³	1.1 × 10⁻²
TIMM17B	10245	O60830	0.1	1.0 × 10⁻²	4.7 × 10⁻²
PM20D2	135293	Q8IYS1	0.1	2.2 × 10⁻³	1.6 × 10⁻²
NDUFA13	51079	Q9P0J0	0.1	6.0 × 10⁻³	3.2 × 10⁻²
ABHD2	11057	A0A024RC89	0.1	1.0 × 10⁻²	4.6 × 10⁻²
LMNB1	4001	B4DZT3	0.1	9.5 × 10⁻⁴	8.2 × 10⁻³
RBM6	10180	A8K6Q4	0.1	1.1 × 10⁻²	4.8 × 10⁻²
ATM	472	A0A024R3C7	0.1	5.8 × 10⁻³	3.2 × 10⁻²
FBXL3	26224	Q9UKT7	0.1	1.1 × 10⁻²	4.9 × 10⁻²
TPT1	7178	A0A0B4J2C3	0.1	1.8 × 10⁻⁴	2.2 × 10⁻³
MAPRE1	22919	Q15691	0.1	7.5 × 10⁻⁴	6.8 × 10⁻³
PAFAH1B1	5048	P43034	0.1	1.9 × 10⁻³	1.4 × 10⁻²
OS9	10956	Q13438	0.1	2.6 × 10⁻³	1.8 × 10⁻²
DST	667	B4DSS9	0.1	5.3 × 10⁻³	3.0 × 10⁻²
COX8A	1351	P10176	0.1	2.6 × 10⁻³	1.8 × 10⁻²
DIP2B	57609	Q7Z3H2	0.1	6.2 × 10⁻³	3.3 × 10⁻²
KIDINS220	57498	Q9ULH0	0.1	2.2 × 10⁻³	1.6 × 10⁻²
KMT5A	387893	Q9NQR1	0.1	5.6 × 10⁻³	3.1 × 10⁻²
ZBTB10	65986	Q96DT7	0.1	3.8 × 10⁻³	2.3 × 10⁻²
PDCD4	27250	B4DKX4	0.1	8.8 × 10⁻³	4.3 × 10⁻²
DCAF1	9730	Q9Y4B6	0.1	1.1 × 10⁻²	4.9 × 10⁻²
ICE1	23379	Q9Y2F5	0.1	4.1 × 10⁻³	2.5 × 10⁻²
PAIP1	10605	Q9H074	0.1	4.8 × 10⁻³	2.8 × 10⁻²
ADD3	120	Q9UEY8	0.1	5.1 × 10⁻³	2.9 × 10⁻²
MIB1	57534	Q86YT6	0.1	3.9 × 10⁻⁴	4.1 × 10⁻³
REPS1	85021	Q96D71	0.1	6.6 × 10⁻³	3.5 × 10⁻²
UBA5	79876	Q9GZZ9	0.1	9.9 × 10⁻³	4.6 × 10⁻²
SOAT1	6646	P35610	0.1	3.6 × 10⁻³	2.2 × 10⁻²
LAPTM4B	55353	Q86VI4	0.1	2.1 × 10⁻⁴	2.5 × 10⁻³
ATRX	546	A4LAA3	0.1	1.1 × 10⁻³	8.9 × 10⁻³
ZNF503	84858	Q96F45	0.1	1.7 × 10⁻³	1.3 × 10⁻²
ATP6V0D1	9114	P61421	0.1	9.5 × 10⁻³	4.5 × 10⁻²
MAPK1	5594	P28482	0.1	4.4 × 10⁻⁴	4.4 × 10⁻³
TPGS2	25941	Q68CL5	0.1	1.1 × 10⁻³	8.9 × 10⁻³
MARCHF6	10299	O60337	0.1	9.4 × 10⁻³	4.5 × 10⁻²
GNS	2799	A0A024RBC5	0.1	3.2 × 10⁻³	2.1 × 10⁻²
SCAP	22937	B7Z6H0	0.1	2.3 × 10⁻³	1.6 × 10⁻²
SPCS1	28972	Q9Y6A9	0.1	4.9 × 10⁻³	2.8 × 10⁻²
DAG1	1605	A0A024R2W4	0.1	2.4 × 10⁻³	1.7 × 10⁻²
ARHGAP5	394	Q13017	0.1	1.3 × 10⁻³	1.1 × 10⁻²
ANO6	196527	B3KX12	0.1	1.0 × 10⁻²	4.8 × 10⁻²
ITCH	83737	Q96J02	0.1	3.0 × 10⁻³	1.9 × 10⁻²
ROCK2	9475	O75116	0.1	3.0 × 10⁻³	2.0 × 10⁻²
CCNI	10983	A0A024RDH0	0.1	2.3 × 10⁻³	1.6 × 10⁻²
RAC3	5881	P60763	0.1	6.0 × 10⁻³	3.3 × 10⁻²
CEP170B	283638	Q9Y4F5	0.1	9.4 × 10⁻³	4.5 × 10⁻²
MRE11	4361	P49959	0.1	8.0 × 10⁻³	4.0 × 10⁻²
ZNF664	144348	A0A024RBR7	0.1	1.1 × 10⁻³	8.9 × 10⁻³
HMGCS1	3157	A0A024R059	0.1	3.9 × 10⁻³	2.4 × 10⁻²
ETNK1	55500	Q9HBU6	0.1	1.5 × 10⁻³	1.2 × 10⁻²
NIPSNAP1	8508	B4DQI7	0.1	2.2 × 10⁻³	1.6 × 10⁻²
MKLN1	4289	B4DG30	0.1	4.6 × 10⁻³	2.7 × 10⁻²
PBRM1	55193	Q86U86	0.1	2.9 × 10⁻³	1.9 × 10⁻²
ASCC3	10973	B4DR60	0.1	5.2 × 10⁻⁴	5.1 × 10⁻³
RBM12B	389677	Q8IXT5	0.1	9.4 × 10⁻³	4.5 × 10⁻²
CENPH	64946	A0A0S2Z5T0	0.1	9.1 × 10⁻³	4.4 × 10⁻²
MAF1	84232	Q9H063	0.1	3.6 × 10⁻³	2.2 × 10⁻²
DCAF6	55827	Q58WW2	0.1	5.1 × 10⁻³	2.9 × 10⁻²
PCYOX1	51449	Q9UHG3	0.1	2.7 × 10⁻³	1.8 × 10⁻²
UBE2E1	7324	P51965	0.1	2.6 × 10⁻³	1.8 × 10⁻²
ARHGEF2	9181	Q92974	0.1	1.0 × 10⁻²	4.7 × 10⁻²
MSMO1	6307	Q15800	0.1	7.8 × 10⁻³	3.9 × 10⁻²
GNAQ	2776	A0A024R240	0.1	3.6 × 10⁻³	2.3 × 10⁻²
AZIN1	51582	B3KTF6	0.1	5.1 × 10⁻⁴	5.0 × 10⁻³
SHOC2	8036	Q9UQ13	0.1	5.9 × 10⁻³	3.2 × 10⁻²
COPS5	10987	A0A024R7W9	0.1	8.9 × 10⁻³	4.3 × 10⁻²
NETO2	81831	Q32NC3	0.1	4.4 × 10⁻³	2.6 × 10⁻²
UNG	7374	E5KTA6	0.1	1.3 × 10⁻³	1.0 × 10⁻²
BLTP3A	54887	Q6BDS2	0.1	8.2 × 10⁻³	4.1 × 10⁻²
SLITRK5	26050	O94991	0.1	7.6 × 10⁻³	3.9 × 10⁻²
CDC40	51362	O60508	0.1	5.6 × 10⁻³	3.1 × 10⁻²
AP3M1	26985	A0A024QZR5	0.1	1.2 × 10⁻³	1.0 × 10⁻²
RANBP6	26953	O60518	0.1	4.5 × 10⁻³	2.6 × 10⁻²
LAGE3	8270	Q14657	0.1	3.9 × 10⁻³	2.4 × 10⁻²
SELENOH	280636	Q8IZQ5	0.1	5.0 × 10⁻³	2.9 × 10⁻²
SHQ1	55164	Q6PI26	0.1	5.6 × 10⁻³	3.1 × 10⁻²
AFDN	4301	P55196	0.1	1.6 × 10⁻⁴	2.0 × 10⁻³
KIF4A	24137	O95239	0.1	1.5 × 10⁻³	1.1 × 10⁻²
PHF20	51230	Q9BVI0	0.1	1.0 × 10⁻²	4.7 × 10⁻²
APMAP	57136	Q9HDC9	0.1	2.2 × 10⁻³	1.5 × 10⁻²
GTSE1	51512	Q9NYZ3	0.1	6.5 × 10⁻³	3.4 × 10⁻²
TBCB	1155	Q99426	0.1	7.2 × 10⁻³	3.7 × 10⁻²
CNIH4	29097	Q9P003	0.1	4.4 × 10⁻³	2.6 × 10⁻²
C20orf27	54976	Q9GZN8	0.1	1.2 × 10⁻³	9.8 × 10⁻³
TUBA1A	7846	Q71U36	0.1	2.1 × 10⁻³	1.5 × 10⁻²
POGLUT3	143888	Q7Z4H8	0.1	1.4 × 10⁻³	1.1 × 10⁻²
KLF9	687	A0A024R260	0.1	3.1 × 10⁻³	2.0 × 10⁻²
CETN2	1069	P41208	0.1	1.1 × 10⁻²	4.9 × 10⁻²
PCM1	5108	B9EIS5	0.1	7.5 × 10⁻⁴	6.7 × 10⁻³
KLHL8	57563	B3KY78	0.1	7.1 × 10⁻³	3.7 × 10⁻²
COL6A1	1291	P12109	0.1	2.8 × 10⁻³	1.9 × 10⁻²
FOXP1	27086	Q9H334	0.1	8.7 × 10⁻³	4.3 × 10⁻²
JUN	3725	P05412	0.1	4.3 × 10⁻⁴	4.4 × 10⁻³
PSEN1	5663	A0A024R6A3	0.1	7.4 × 10⁻³	3.8 × 10⁻²
ATRN	8455	B4DZ36	0.1	6.4 × 10⁻³	3.4 × 10⁻²
SPTLC2	9517	A0A024R6H1	0.1	1.5 × 10⁻³	1.2 × 10⁻²
FNDC3A	22862	A0A024RDT9	0.1	2.0 × 10⁻³	1.4 × 10⁻²
RAB2A	5862	P61019	0.1	3.4 × 10⁻³	2.1 × 10⁻²
CMSS1	84319	Q9BQ75	0.1	5.0 × 10⁻³	2.9 × 10⁻²
CYFIP1	23191	Q7L576	0.1	7.1 × 10⁻⁴	6.5 × 10⁻³
CAPN1	823	B2RDI5	0.1	4.5 × 10⁻³	2.7 × 10⁻²
HERC1	8925	A0A024R5W0	0.1	1.1 × 10⁻²	4.9 × 10⁻²
HOXA5	3202	P20719	0.1	6.6 × 10⁻³	3.5 × 10⁻²
SENP6	26054	B3KMM0	0.1	9.6 × 10⁻⁴	8.2 × 10⁻³
LRBA	987	P50851	0.1	3.1 × 10⁻⁴	3.4 × 10⁻³
OSBPL1A	114876	Q9BXW6	0.1	6.1 × 10⁻³	3.3 × 10⁻²
ATP5PD	10476	O75947	0.1	3.6 × 10⁻³	2.2 × 10⁻²
ARFIP1	27236	B4E273	0.1	7.5 × 10⁻³	3.8 × 10⁻²
MFSD1	64747	Q9H3U5	0.1	1.1 × 10⁻²	5.0 × 10⁻²
PLEKHA8	84725	Q96JA3	0.1	4.4 × 10⁻³	2.6 × 10⁻²
PTPN13	5783	Q12923	0.1	2.3 × 10⁻⁴	2.7 × 10⁻³
STAU2	27067	A0A0A0MTC5	0.1	9.0 × 10⁻³	4.4 × 10⁻²
CAMK2D	817	A0A024RDK3	0.1	6.6 × 10⁻³	3.5 × 10⁻²
CANT1	124583	A0A024R8U8	0.1	6.5 × 10⁻³	3.5 × 10⁻²
SLC4A7	9497	Q9Y6M7	0.1	1.9 × 10⁻³	1.4 × 10⁻²
RPAP2	79871	Q8IXW5	0.1	1.1 × 10⁻²	4.9 × 10⁻²
CHPF	79586	Q8IZ52	0.1	8.3 × 10⁻³	4.1 × 10⁻²
EZH2	2146	Q15910	0.1	3.5 × 10⁻⁴	3.7 × 10⁻³
FRYL	285527	B3KXG5	0.1	2.4 × 10⁻³	1.6 × 10⁻²
GLCE	26035	O94923	0.1	5.8 × 10⁻³	3.2 × 10⁻²
SOCS4	122809	Q5H9R6	0.1	3.4 × 10⁻³	2.1 × 10⁻²
NOP9	161424	Q86U38	0.1	1.0 × 10⁻²	4.7 × 10⁻²
WNK1	65125	Q9H4A3	0.1	1.7 × 10⁻⁴	2.1 × 10⁻³
ATP6V1A	523	P38606	0.1	2.5 × 10⁻⁵	4.3 × 10⁻⁴
KMT5B	51111	Q4FZB7	0.1	1.0 × 10⁻²	4.8 × 10⁻²
PI4K2A	55361	Q9BTU6	0.1	8.3 × 10⁻³	4.1 × 10⁻²
LRP3	4037	O75074	0.1	1.4 × 10⁻³	1.1 × 10⁻²
CMTM4	146223	Q8IZR5	0.1	1.7 × 10⁻³	1.3 × 10⁻²
RIC1	57589	Q4ADV7	0.1	5.2 × 10⁻³	3.0 × 10⁻²
GOLPH3	64083	Q9H4A6	0.1	7.7 × 10⁻⁴	6.9 × 10⁻³
TMEM41B	440026	Q5BJD5	0.1	1.4 × 10⁻³	1.1 × 10⁻²
MPHOSPH8	54737	Q99549	0.1	7.1 × 10⁻³	3.7 × 10⁻²
ZGRF1	55345	Q86YA3	0.1	1.1 × 10⁻²	4.9 × 10⁻²
RASA1	5921	P20936	0.1	1.0 × 10⁻²	4.7 × 10⁻²
MSANTD4	84437	Q8NCY6	0.1	1.1 × 10⁻²	4.9 × 10⁻²
SH3D19	152503	Q5HYK7	0.1	8.3 × 10⁻³	4.1 × 10⁻²
PTTG1IP	754	B4DPZ0	0.1	1.6 × 10⁻⁴	2.0 × 10⁻³
CDR2	1039	Q01850	0.1	1.0 × 10⁻²	4.8 × 10⁻²
PCNA	5111	P12004	0.1	6.6 × 10⁻⁵	9.8 × 10⁻⁴
BARD1	580	A0AVN2	0.1	7.9 × 10⁻³	4.0 × 10⁻²
GJA1	2697	P17302	0.1	2.0 × 10⁻⁴	2.4 × 10⁻³
ARL2BP	23568	A0A024R6U9	0.1	1.6 × 10⁻³	1.2 × 10⁻²
STRN	6801	O43815	0.1	1.1 × 10⁻³	9.4 × 10⁻³
RNF11	26994	Q9Y3C5	0.1	2.7 × 10⁻³	1.8 × 10⁻²
RHOT1	55288	Q8IXI2	0.1	6.4 × 10⁻³	3.4 × 10⁻²
CCDC88A	55704	O14997	0.1	1.6 × 10⁻⁴	2.0 × 10⁻³
DENND6A	201627	Q8IWF6	0.1	8.3 × 10⁻⁴	7.4 × 10⁻³
CMTM6	54918	Q9NX76	0.1	1.6 × 10⁻⁴	2.0 × 10⁻³
TM7SF3	51768	Q9NS93	0.1	1.8 × 10⁻³	1.3 × 10⁻²
RELCH	57614	Q9P260	0.1	6.7 × 10⁻³	3.5 × 10⁻²
MINPP1	9562	Q9UNW1	0.1	6.7 × 10⁻³	3.5 × 10⁻²
TRAF3	7187	Q13114	0.1	7.5 × 10⁻⁴	6.8 × 10⁻³
TTC17	55761	Q6MZP1	0.1	6.9 × 10⁻³	3.6 × 10⁻²
FBXO30	84085	Q8TB52	0.1	3.5 × 10⁻³	2.2 × 10⁻²
TRIP11	9321	Q15643	0.1	3.9 × 10⁻³	2.4 × 10⁻²
NECTIN3	25945	Q9NQS3	0.1	2.8 × 10⁻³	1.9 × 10⁻²
ZCCHC3	85364	Q9NUD5	0.1	1.7 × 10⁻³	1.3 × 10⁻²
ADK	132	A0A140VJE0	0.1	1.0 × 10⁻²	4.6 × 10⁻²
CHEK2	11200	O96017	0.1	6.9 × 10⁻³	3.6 × 10⁻²
PPME1	51400	Q9Y570	0.1	3.3 × 10⁻³	2.1 × 10⁻²
UBTD2	92181	B3KMW8	0.1	1.4 × 10⁻³	1.1 × 10⁻²
ZKSCAN8	7745	A0A024RCK7	0.1	8.6 × 10⁻³	4.2 × 10⁻²
SLC23A2	9962	A0A140VK48	0.1	9.8 × 10⁻⁴	8.4 × 10⁻³
ERGIC3	51614	A2TJK5	0.1	2.4 × 10⁻⁴	2.7 × 10⁻³
CDC42BPB	9578	A0A024R6N2	0.1	3.3 × 10⁻⁴	3.6 × 10⁻³
CAPNS1	826	P04632	0.1	8.9 × 10⁻⁴	7.7 × 10⁻³
LMBR1	64327	Q8WVP7	0.1	5.2 × 10⁻⁵	8.1 × 10⁻⁴
PTEN	5728	F6KD01	0.1	3.8 × 10⁻⁴	4.0 × 10⁻³
RSBN1	54665	Q5VWQ0	0.1	5.8 × 10⁻³	3.2 × 10⁻²
LUZP1	7798	Q86V48	0.1	3.2 × 10⁻³	2.0 × 10⁻²
CLIP1	6249	P30622	0.1	2.2 × 10⁻³	1.6 × 10⁻²
KIAA0232	9778	A5YKK5	0.1	4.3 × 10⁻³	2.6 × 10⁻²
PDE3B	5140	A7E2E5	0.1	1.2 × 10⁻³	9.9 × 10⁻³
ALDH16A1	126133	Q8IZ83	0.1	7.9 × 10⁻³	4.0 × 10⁻²
ITM2B	9445	Q9Y287	0.1	8.0 × 10⁻⁴	7.1 × 10⁻³
ADAM10	102	A0A024R5U5	0.1	9.1 × 10⁻⁴	7.9 × 10⁻³
SCARNA10	692148		0.1	6.0 × 10⁻⁴	5.7 × 10⁻³
RHOC	389	A0A024R0I3	0.1	5.7 × 10⁻³	3.2 × 10⁻²
DYNC2I2	89891	Q96EX3	0.1	1.9 × 10⁻³	1.4 × 10⁻²
TAF10	6881	Q12962	0.1	7.0 × 10⁻³	3.6 × 10⁻²
KCTD2	23510	Q14681	0.1	8.0 × 10⁻³	4.0 × 10⁻²
OSBPL8	114882	Q5HYM3	0.1	1.5 × 10⁻⁴	1.9 × 10⁻³
G2E3	55632	B4DL73	0.1	1.1 × 10⁻³	8.9 × 10⁻³
FBXO31	79791	A0A0C4DGU8	0.1	4.8 × 10⁻³	2.8 × 10⁻²
USP28	57646	B4E3L3	0.1	6.2 × 10⁻⁴	5.8 × 10⁻³
ANKIB1	54467	Q9P2G1	0.1	2.4 × 10⁻³	1.7 × 10⁻²
TDP1	55775	A0A024R6L5	0.1	8.2 × 10⁻³	4.1 × 10⁻²
LRRC42	115353	Q9Y546	0.1	1.1 × 10⁻²	4.9 × 10⁻²
DENND4C	55667	Q5VZ89	0.1	6.4 × 10⁻⁴	5.9 × 10⁻³
H1-0	3005	P07305	0.1	4.4 × 10⁻⁴	4.4 × 10⁻³
ZKSCAN1	7586	B3KNP9	0.1	3.1 × 10⁻³	2.0 × 10⁻²
RRAS2	22800	P62070	0.1	1.5 × 10⁻³	1.2 × 10⁻²
ZNF714	148206	A0A087WU35	0.1	4.2 × 10⁻⁴	4.3 × 10⁻³
DPP3	10072	Q9NY33	0.1	5.2 × 10⁻³	3.0 × 10⁻²
KMT2E	55904	Q8IZD2	0.1	9.4 × 10⁻³	4.5 × 10⁻²
PPP4R2	151987	Q9NY27	0.1	4.1 × 10⁻⁴	4.2 × 10⁻³
ITSN2	50618	A6H8W8	0.1	4.7 × 10⁻³	2.8 × 10⁻²
IFNGR2	3460	E7EUY1	0.1	8.7 × 10⁻³	4.3 × 10⁻²
BRIP1	83990	A0A024QZ45	0.1	1.4 × 10⁻³	1.1 × 10⁻²
NRBP1	29959	Q9UHY1	0.1	6.6 × 10⁻³	3.5 × 10⁻²
SEPTIN9	10801	Q9UHD8	0.1	7.8 × 10⁻⁵	1.1 × 10⁻³
KCTD5	54442	Q9NXV2	0.1	4.5 × 10⁻³	2.7 × 10⁻²
UNC13B	10497	O14795	0.1	4.7 × 10⁻⁴	4.7 × 10⁻³
NR2F1	7025	P10589	0.1	1.2 × 10⁻³	9.6 × 10⁻³
SCYL2	55681	Q6P3W7	0.1	6.4 × 10⁻⁴	5.9 × 10⁻³
MEX3A	92312	A1L020	0.1	1.0 × 10⁻²	4.7 × 10⁻²
PRNP	5621	P04156	0.1	6.9 × 10⁻³	3.6 × 10⁻²
ELF2	1998	Q15723	0.1	1.6 × 10⁻³	1.2 × 10⁻²
MAGI3	260425	Q5TCQ9	0.1	1.6 × 10⁻³	1.2 × 10⁻²
UGDH	7358	O60701	0.1	4.9 × 10⁻³	2.8 × 10⁻²
ABHD12	26090	Q8N2K0	0.1	1.0 × 10⁻²	4.7 × 10⁻²
PNMA1	9240	Q8ND90	0.1	1.1 × 10⁻²	4.8 × 10⁻²
NCOA2	10499	Q15596	0.1	1.2 × 10⁻³	9.6 × 10⁻³
XPC	7508	Q01831	0.1	2.1 × 10⁻³	1.5 × 10⁻²
ITSN1	6453	Q15811	0.1	4.5 × 10⁻⁴	4.5 × 10⁻³
TMEM160	54958	Q9NX00	0.2	9.0 × 10⁻³	4.3 × 10⁻²
MALAT1	378938		0.2	2.2 × 10⁻⁵	3.9 × 10⁻⁴
CCNB2	9133	O95067	0.2	7.7 × 10⁻⁴	6.9 × 10⁻³
FKBP3	2287	Q00688	0.2	1.8 × 10⁻⁴	2.2 × 10⁻³
HINT3	135114	Q9NQE9	0.2	4.4 × 10⁻³	2.6 × 10⁻²
MGME1	92667	Q9BQP7	0.2	3.2 × 10⁻³	2.0 × 10⁻²
CTNNA1	1495	G3XAM7	0.2	6.3 × 10⁻⁶	1.4 × 10⁻⁴
XRCC1	7515	B2RCY5	0.2	6.3 × 10⁻³	3.4 × 10⁻²
EXOSC7	23016	A0A024R2P7	0.2	5.5 × 10⁻³	3.1 × 10⁻²
ZFYVE9	9372	O95405	0.2	2.9 × 10⁻³	1.9 × 10⁻²
CYBA	1535	B4DT46	0.2	2.6 × 10⁻⁴	3.0 × 10⁻³
GNAI1	2770	P63096	0.2	2.0 × 10⁻³	1.4 × 10⁻²
DTD1	92675	Q8TEA8	0.2	3.1 × 10⁻³	2.0 × 10⁻²
CSPP1	79848	Q1MSJ5	0.2	9.8 × 10⁻³	4.6 × 10⁻²
ID4	3400	P47928	0.2	6.3 × 10⁻⁵	9.4 × 10⁻⁴
SLC7A11	23657	Q9UPY5	0.2	1.8 × 10⁻³	1.3 × 10⁻²
HS2ST1	9653	Q7LGA3	0.2	4.8 × 10⁻⁵	7.5 × 10⁻⁴
SESN3	143686	P58005	0.2	1.5 × 10⁻⁴	1.9 × 10⁻³
EEA1	8411	Q15075	0.2	2.2 × 10⁻³	1.5 × 10⁻²
TMEM170A	124491	Q8WVE7	0.2	2.4 × 10⁻³	1.7 × 10⁻²
RAPGEF1	2889	Q13905	0.2	5.6 × 10⁻⁴	5.4 × 10⁻³
ZNF92	168374	Q03936	0.2	6.5 × 10⁻³	3.5 × 10⁻²
RALGAPA1	253959	Q6GYQ0	0.2	5.2 × 10⁻⁴	5.1 × 10⁻³
PLEKHH3	79990	Q7Z736	0.2	6.4 × 10⁻³	3.4 × 10⁻²
TMEM50B	757	P56557	0.2	7.4 × 10⁻³	3.8 × 10⁻²
FAIM	55179	Q9NVQ4	0.2	7.5 × 10⁻³	3.8 × 10⁻²
PIK3R3	8503	Q8N381	0.2	3.7 × 10⁻⁴	3.9 × 10⁻³
NME4	4833	A0A087WVT9	0.2	1.6 × 10⁻⁴	2.0 × 10⁻³
NECAP2	55707	Q9NVZ3	0.2	3.1 × 10⁻³	2.0 × 10⁻²
RAB11FIP3	9727	O75154	0.2	3.0 × 10⁻³	2.0 × 10⁻²
FARP2	9855	O94887	0.2	5.8 × 10⁻³	3.2 × 10⁻²
TADA3	10474	A8K899	0.2	5.8 × 10⁻³	3.2 × 10⁻²
NT5C2	22978	A8K6K2	0.2	3.5 × 10⁻³	2.2 × 10⁻²
ZNF678	339500		0.2	8.5 × 10⁻⁴	7.5 × 10⁻³
ASB7	140460	A0A024RCD9	0.2	5.9 × 10⁻³	3.2 × 10⁻²
FOXN2	3344	P32314	0.2	3.4 × 10⁻³	2.1 × 10⁻²
ARL6IP1	23204	Q15041	0.2	2.0 × 10⁻⁶	5.4 × 10⁻⁵
C7orf50	84310	Q9BRJ6	0.2	9.0 × 10⁻⁴	7.8 × 10⁻³
MAF	4094	O75444	0.2	1.2 × 10⁻⁴	1.6 × 10⁻³
ANKRD50	57182	Q8TB46	0.2	2.5 × 10⁻³	1.7 × 10⁻²
GAS1	2619	P54826	0.2	6.6 × 10⁻⁴	6.1 × 10⁻³
NISCH	11188	Q9Y2I1	0.2	3.2 × 10⁻⁴	3.5 × 10⁻³
WRN	7486	Q14191	0.2	6.4 × 10⁻³	3.4 × 10⁻²
DPY19L4	286148	A0A024R9F2	0.2	3.0 × 10⁻³	2.0 × 10⁻²
STYX	6815	A0A024R641	0.2	4.8 × 10⁻³	2.8 × 10⁻²
IFT80	57560	Q9P2H3	0.2	7.3 × 10⁻³	3.7 × 10⁻²
TBX2	6909	A0A024QZ86	0.2	1.0 × 10⁻²	4.7 × 10⁻²
RHNO1	83695	Q9BSD3	0.2	3.1 × 10⁻³	2.0 × 10⁻²
ERBB2	2064	P04626	0.2	1.6 × 10⁻³	1.2 × 10⁻²
FYTTD1	84248	Q96QD9	0.2	5.3 × 10⁻⁵	8.2 × 10⁻⁴
HOXA10	3206	P31260	0.2	8.7 × 10⁻⁴	7.6 × 10⁻³
ERC1	23085	G8JLD3	0.2	2.7 × 10⁻³	1.8 × 10⁻²
ADCY9	115	O60503	0.2	4.3 × 10⁻⁴	4.4 × 10⁻³
GNE	10020	Q9Y223	0.2	1.5 × 10⁻³	1.1 × 10⁻²
ATP6V1H	51606	A0A024R7U9	0.2	1.6 × 10⁻³	1.2 × 10⁻²
RNF19A	25897	Q9NV58	0.2	1.0 × 10⁻²	4.8 × 10⁻²
PLIN3	10226	A0A140VJN8	0.2	4.7 × 10⁻³	2.7 × 10⁻²
CDC25B	994	B4DIG0	0.2	3.4 × 10⁻³	2.2 × 10⁻²
STX12	23673	Q86Y82	0.2	8.4 × 10⁻⁴	7.4 × 10⁻³
CYP20A1	57404	Q6UW02	0.2	4.1 × 10⁻³	2.5 × 10⁻²
EIPR1	7260	Q53HC9	0.2	9.2 × 10⁻³	4.4 × 10⁻²
ISYNA1	51477	Q9NPH2	0.2	1.9 × 10⁻⁴	2.3 × 10⁻³
CECR2	27443	B7WPH3	0.2	4.5 × 10⁻⁴	4.5 × 10⁻³
IGF2BP3	10643	O00425	0.2	1.9 × 10⁻⁴	2.3 × 10⁻³
SYNE2	23224	Q8WXH0	0.2	1.2 × 10⁻³	9.9 × 10⁻³
SLAIN2	57606	A0A024R9T6	0.2	1.7 × 10⁻³	1.3 × 10⁻²
EFL1	79631	Q7Z2Z2	0.2	2.7 × 10⁻³	1.8 × 10⁻²
LRWD1	222229	Q9UFC0	0.2	5.2 × 10⁻³	3.0 × 10⁻²
NUDT12	83594	B4E1W3	0.2	2.4 × 10⁻³	1.7 × 10⁻²
PPM1E	22843	A7E2X1	0.2	5.5 × 10⁻³	3.1 × 10⁻²
CELSR1	9620	Q9NYQ6	0.2	1.8 × 10⁻³	1.3 × 10⁻²
FKBP9	11328	A7YQ73	0.2	2.5 × 10⁻³	1.7 × 10⁻²
SEPTIN6	23157	Q14141	0.2	1.7 × 10⁻⁴	2.1 × 10⁻³
ZNF322	79692	A0A024QZZ4	0.2	1.7 × 10⁻³	1.3 × 10⁻²
AP3B1	8546	A0A0S2Z5J4	0.2	2.4 × 10⁻⁵	4.3 × 10⁻⁴
PRPF18	8559	Q99633	0.2	8.3 × 10⁻³	4.1 × 10⁻²
CDKN3	1033	Q16667	0.2	1.1 × 10⁻²	5.0 × 10⁻²
N4BP2	55728	B2ZZ87	0.2	5.7 × 10⁻⁴	5.5 × 10⁻³
SMURF2	64750	Q96DE7	0.2	1.0 × 10⁻³	8.4 × 10⁻³
DOCK1	1793	B2RUU3	0.2	3.6 × 10⁻⁴	3.9 × 10⁻³
DNMT3B	1789	Q9UBC3	0.2	1.5 × 10⁻³	1.2 × 10⁻²
LRRFIP2	9209	Q9Y608	0.2	1.7 × 10⁻³	1.3 × 10⁻²
USP46	64854	P62068	0.2	5.1 × 10⁻⁴	5.0 × 10⁻³
PTK2	5747	Q05397	0.2	3.3 × 10⁻⁵	5.6 × 10⁻⁴
GSS	2937	P48637	0.2	1.3 × 10⁻³	1.0 × 10⁻²
ACVR1B	91	P36896	0.2	4.9 × 10⁻³	2.8 × 10⁻²
DDHD1	80821	Q8NEL9	0.2	1.3 × 10⁻³	1.0 × 10⁻²
MLLT3	4300	P42568	0.2	2.6 × 10⁻⁴	2.9 × 10⁻³
UBP1	7342	A0A024R2J0	0.2	6.2 × 10⁻⁶	1.4 × 10⁻⁴
TNFRSF10B	8795	O14763	0.2	6.2 × 10⁻⁵	9.3 × 10⁻⁴
GALNT11	63917	B7Z5G5	0.2	1.2 × 10⁻⁴	1.6 × 10⁻³
ALG12	79087	A0A024R4V6	0.2	1.2 × 10⁻³	9.8 × 10⁻³
SH3RF1	57630	Q7Z6J0	0.2	5.6 × 10⁻³	3.1 × 10⁻²
KANK2	25959	Q63ZY3	0.2	2.2 × 10⁻³	1.5 × 10⁻²
CENPW	387103	Q5EE01	0.2	1.2 × 10⁻³	9.8 × 10⁻³
MTA3	57504	D6W5A2	0.2	7.2 × 10⁻³	3.7 × 10⁻²
FKRP	79147	A0A024R0R7	0.2	1.0 × 10⁻²	4.8 × 10⁻²
RYBP	23429	Q8N488	0.2	2.7 × 10⁻³	1.8 × 10⁻²
APBA2	321	Q59G28	0.2	5.3 × 10⁻³	3.0 × 10⁻²
FOXC1	2296	Q12948	0.2	1.2 × 10⁻⁶	3.4 × 10⁻⁵
ZBTB34	403341	Q8NCN2	0.2	1.0 × 10⁻³	8.7 × 10⁻³
RABGAP1	23637	Q9Y3P9	0.2	6.7 × 10⁻³	3.5 × 10⁻²
CORO1C	23603	Q9ULV4	0.2	1.9 × 10⁻³	1.4 × 10⁻²
FAM76B	143684	F5GX09	0.2	6.9 × 10⁻³	3.6 × 10⁻²
FAM210A	125228	Q96ND0	0.2	9.3 × 10⁻³	4.5 × 10⁻²
MSL2	55167	Q9HCI7	0.2	6.7 × 10⁻³	3.5 × 10⁻²
NORAD	647979		0.2	2.4 × 10⁻⁶	6.3 × 10⁻⁵
NCOA3	8202	Q59EE8	0.2	2.9 × 10⁻⁴	3.3 × 10⁻³
PMF1	11243	Q6P1K2	0.2	8.4 × 10⁻³	4.1 × 10⁻²
ZNF529	57711	Q6P280	0.2	9.7 × 10⁻³	4.6 × 10⁻²
PPM1D	8493	A0A0S2Z4M2	0.2	8.1 × 10⁻⁴	7.2 × 10⁻³
WBP1L	54838	Q9NX94	0.2	3.6 × 10⁻³	2.2 × 10⁻²
ZMAT3	64393	Q9HA38	0.2	6.5 × 10⁻³	3.5 × 10⁻²
APAF1	317	O14727	0.2	2.6 × 10⁻⁴	3.0 × 10⁻³
UBE2W	55284	Q96B02	0.2	1.2 × 10⁻³	9.8 × 10⁻³
SLC25A25	114789	Q6KCM7	0.2	8.0 × 10⁻³	4.0 × 10⁻²
PIAS1	8554	O75925	0.2	3.9 × 10⁻³	2.4 × 10⁻²
UBE2H	7328	P62256	0.2	2.8 × 10⁻⁴	3.1 × 10⁻³
CDH2	1000	P19022	0.2	4.2 × 10⁻⁶	1.0 × 10⁻⁴
RHPN2	85415	Q8IUC4	0.2	2.1 × 10⁻³	1.5 × 10⁻²
CYFIP2	26999	Q96F07	0.2	7.5 × 10⁻⁵	1.1 × 10⁻³
IFT52	51098	Q9Y366	0.2	7.4 × 10⁻³	3.8 × 10⁻²
EBF3	253738	Q9H4W6	0.2	5.9 × 10⁻³	3.2 × 10⁻²
CCDC77	84318	Q9BR77	0.2	8.6 × 10⁻³	4.2 × 10⁻²
TRAFD1	10906	A0A024RBK4	0.2	9.3 × 10⁻⁵	1.3 × 10⁻³
ITGAE	3682	P38570	0.2	8.9 × 10⁻³	4.3 × 10⁻²
BTG2	7832	P78543	0.2	1.0 × 10⁻²	4.7 × 10⁻²
PTPRA	5786	P18433	0.2	2.0 × 10⁻⁴	2.4 × 10⁻³
WEE1	7465	P30291	0.2	1.1 × 10⁻⁴	1.4 × 10⁻³
OSTM1	28962	Q86WC4	0.2	7.8 × 10⁻⁴	7.0 × 10⁻³
TRPC1	7220	P48995	0.2	5.0 × 10⁻³	2.9 × 10⁻²
NMT2	9397	B3KT39	0.2	6.4 × 10⁻⁴	5.9 × 10⁻³
ROBO1	6091	Q9Y6N7	0.2	2.6 × 10⁻⁷	9.7 × 10⁻⁶
ARID5B	84159	Q14865	0.2	5.6 × 10⁻³	3.1 × 10⁻²
MAP4K3	8491	B3KMM5	0.2	8.7 × 10⁻⁴	7.6 × 10⁻³
POMGNT1	55624	B7Z7Q4	0.2	1.0 × 10⁻³	8.7 × 10⁻³
SESN2	83667	P58004	0.2	2.7 × 10⁻⁴	3.0 × 10⁻³
BCAS3	54828	Q9H6U6	0.2	5.3 × 10⁻³	3.0 × 10⁻²
DENND4A	10260	Q05C90	0.2	3.4 × 10⁻⁴	3.7 × 10⁻³
LAMA3	3909	A0A0A6YYF2	0.2	1.2 × 10⁻³	9.8 × 10⁻³
SPIRE1	56907	Q08AE8	0.2	1.4 × 10⁻⁴	1.8 × 10⁻³
RALY	22913	Q9UKM9	0.2	6.7 × 10⁻⁵	1.0 × 10⁻³
RRM2B	50484	Q7LG56	0.2	5.6 × 10⁻⁴	5.4 × 10⁻³
SLC2A13	114134	Q96QE2	0.2	3.0 × 10⁻³	1.9 × 10⁻²
TERF1	7013	P54274	0.2	2.3 × 10⁻⁴	2.7 × 10⁻³
MYO9A	4649	B2RTY4	0.2	4.2 × 10⁻⁵	6.7 × 10⁻⁴
EPC2	26122	Q52LR7	0.2	1.1 × 10⁻³	8.8 × 10⁻³
ZNF830	91603	Q96NB3	0.2	7.9 × 10⁻³	4.0 × 10⁻²
USP42	84132	Q9H9J4	0.2	7.6 × 10⁻³	3.9 × 10⁻²
ZNF48	197407	Q96MX3	0.2	5.8 × 10⁻⁴	5.5 × 10⁻³
AGRN	375790	O00468	0.2	4.9 × 10⁻⁶	1.2 × 10⁻⁴
HEATR5A	25938	F5H619	0.2	1.2 × 10⁻⁵	2.5 × 10⁻⁴
PLOD2	5352	O00469	0.2	7.7 × 10⁻⁷	2.4 × 10⁻⁵
ING5	84289	A0A1B0GW41	0.2	5.7 × 10⁻⁴	5.5 × 10⁻³
PLXNB2	23654	O15031	0.2	3.3 × 10⁻⁴	3.6 × 10⁻³
BMPR1A	657	P36894	0.2	4.6 × 10⁻⁵	7.3 × 10⁻⁴
TUBD1	51174	Q9UJT1	0.2	8.8 × 10⁻³	4.3 × 10⁻²
FBXL20	84961	Q96IG2	0.2	5.8 × 10⁻⁴	5.5 × 10⁻³
LTBP1	4052	Q14766	0.2	1.5 × 10⁻⁴	1.9 × 10⁻³
COG3	83548	Q96JB2	0.2	2.2 × 10⁻³	1.6 × 10⁻²
PBX3	5090	P40426	0.2	6.9 × 10⁻³	3.6 × 10⁻²
EXOC4	60412	Q6NX51	0.2	6.0 × 10⁻⁵	9.0 × 10⁻⁴
C22orf39	128977	Q6P5X5	0.2	4.1 × 10⁻³	2.5 × 10⁻²
CASP6	839	P55212	0.2	9.6 × 10⁻³	4.5 × 10⁻²
GINM1	116254	Q9NU53	0.2	3.9 × 10⁻³	2.4 × 10⁻²
BMT2	154743	Q1RMZ1	0.2	9.5 × 10⁻³	4.5 × 10⁻²
ATG14	22863	Q6ZNE5	0.2	6.3 × 10⁻³	3.4 × 10⁻²
SOX4	6659	Q06945	0.2	1.6 × 10⁻⁸	9.8 × 10⁻⁷
ARHGAP39	80728	Q9C0H5	0.2	7.9 × 10⁻³	4.0 × 10⁻²
CARD8	22900	Q9Y2G2	0.2	5.7 × 10⁻³	3.2 × 10⁻²
TRAPPC2	6399	P0DI81	0.2	1.5 × 10⁻³	1.2 × 10⁻²
POLH	5429	B3KN75	0.2	3.6 × 10⁻⁴	3.9 × 10⁻³
PARD6B	84612	Q9BYG5	0.2	2.0 × 10⁻³	1.4 × 10⁻²
RAB33B	83452	Q9H082	0.2	9.9 × 10⁻³	4.6 × 10⁻²
LCP1	3936	A0A024RDT4	0.2	1.1 × 10⁻³	9.4 × 10⁻³
MAPKBP1	23005	O60336	0.2	9.5 × 10⁻³	4.5 × 10⁻²
SPATS2	65244	A0A024R101	0.2	2.2 × 10⁻³	1.6 × 10⁻²
PITX2	5308	Q99697	0.2	8.6 × 10⁻³	4.2 × 10⁻²
SUOX	6821	A0A024RB79	0.2	1.1 × 10⁻²	4.9 × 10⁻²
SENP7	57337	J3QT09	0.2	6.8 × 10⁻³	3.6 × 10⁻²
FBXO34	55030	A0A024R653	0.2	7.9 × 10⁻⁵	1.1 × 10⁻³
PALM	5064	A0A024R207	0.2	8.6 × 10⁻³	4.2 × 10⁻²
ZFP30	22835	D3Y2A0	0.2	2.3 × 10⁻³	1.6 × 10⁻²
CLIC4	25932	Q6FIC5	0.2	1.4 × 10⁻⁷	5.9 × 10⁻⁶
TMUB2	79089	Q71RG4	0.2	5.2 × 10⁻³	2.9 × 10⁻²
MLLT10	8028	P55197	0.2	1.6 × 10⁻³	1.2 × 10⁻²
CBY1	25776	A0A087WUW0	0.2	6.9 × 10⁻³	3.6 × 10⁻²
REEP2	51308	A8K3D2	0.2	2.1 × 10⁻³	1.5 × 10⁻²
DMXL2	23312	Q8TDJ6	0.2	2.9 × 10⁻⁵	5.0 × 10⁻⁴
GPC6	10082	Q9Y625	0.2	1.0 × 10⁻⁴	1.4 × 10⁻³
CMTM7	112616	A0A024R2L3	0.2	8.8 × 10⁻³	4.3 × 10⁻²
NRP1	8829	O14786	0.2	1.2 × 10⁻⁴	1.6 × 10⁻³
ALDH2	217	P05091	0.2	6.5 × 10⁻⁴	6.0 × 10⁻³
BTBD7	55727	Q9P203	0.2	2.3 × 10⁻⁵	4.0 × 10⁻⁴
CDK17	5128	Q00537	0.2	9.8 × 10⁻⁵	1.3 × 10⁻³
PHPT1	29085	Q9NRX4	0.2	7.0 × 10⁻⁵	1.0 × 10⁻³
ZNF260	339324	Q3ZCT1	0.2	2.9 × 10⁻⁴	3.3 × 10⁻³
CEP120	153241	B4DLH5	0.2	3.8 × 10⁻⁴	4.0 × 10⁻³
TIFA	92610	Q96CG3	0.2	5.5 × 10⁻³	3.1 × 10⁻²
ZNF503-AS2	100131213		0.2	3.0 × 10⁻³	1.9 × 10⁻²
CRTAP	10491	O75718	0.2	4.8 × 10⁻⁷	1.6 × 10⁻⁵
TMEM9B	56674	Q9NQ34	0.2	6.6 × 10⁻³	3.5 × 10⁻²
NPTX1	4884	Q15818	0.2	3.3 × 10⁻⁵	5.5 × 10⁻⁴
CLK1	1195	P49759	0.2	1.7 × 10⁻³	1.3 × 10⁻²
PEX1	5189	O43933	0.2	1.6 × 10⁻⁴	2.1 × 10⁻³
ZNF680	340252	Q8NEM1	0.2	4.8 × 10⁻³	2.8 × 10⁻²
ADGRE5	976	P48960	0.2	1.1 × 10⁻²	4.9 × 10⁻²
IKBIP	121457	Q70UQ0	0.2	5.5 × 10⁻⁵	8.5 × 10⁻⁴
ULK1	8408	O75385	0.2	9.2 × 10⁻³	4.4 × 10⁻²
PCDH7	5099	O60245	0.2	1.4 × 10⁻⁷	6.0 × 10⁻⁶
FUT11	170384	Q495W5	0.2	1.0 × 10⁻²	4.6 × 10⁻²
ZNF696	79943	Q9H7X3	0.2	4.2 × 10⁻³	2.5 × 10⁻²
ZBTB7B	51043	O15156	0.2	3.1 × 10⁻³	2.0 × 10⁻²
ATF6B	1388	A0A1U9X796	0.2	5.7 × 10⁻³	3.1 × 10⁻²
ZNF436	80818	A0A024RAF3	0.2	1.0 × 10⁻²	4.7 × 10⁻²
PRKCZ	5590	Q05513	0.2	7.6 × 10⁻³	3.8 × 10⁻²
MCUB	55013	Q9NWR8	0.2	6.4 × 10⁻⁴	6.0 × 10⁻³
POC1A	25886	Q8NBT0	0.2	6.9 × 10⁻⁴	6.3 × 10⁻³
SLIT2	9353	O94813	0.2	2.1 × 10⁻⁸	1.2 × 10⁻⁶
DDIT4	54541	A0A024QZQ6	0.2	3.5 × 10⁻⁵	5.7 × 10⁻⁴
IGFBP5	3488	A0A024R433	0.2	1.5 × 10⁻⁴	1.9 × 10⁻³
REEP3	221035	Q6NUK4	0.2	1.6 × 10⁻⁴	2.0 × 10⁻³
C8orf82	414919	Q6P1X6	0.2	1.5 × 10⁻⁴	1.9 × 10⁻³
MGARP	84709	Q8TDB4	0.2	9.3 × 10⁻³	4.4 × 10⁻²
TWSG1	57045	Q9GZX9	0.2	5.5 × 10⁻⁵	8.4 × 10⁻⁴
FNBP1	23048	Q96RU3	0.2	3.3 × 10⁻⁴	3.6 × 10⁻³
ZNF557	79230	Q8N988	0.2	4.3 × 10⁻⁴	4.4 × 10⁻³
VGLL4	9686	G5E9M7	0.2	1.9 × 10⁻³	1.4 × 10⁻²
CALCOCO1	57658	Q9P1Z2	0.2	7.0 × 10⁻³	3.6 × 10⁻²
GPC3	2719	P51654	0.2	2.9 × 10⁻⁴	3.3 × 10⁻³
WASF3	10810	Q9UPY6	0.2	6.8 × 10⁻⁵	1.0 × 10⁻³
EPHA7	2045	Q15375	0.2	1.7 × 10⁻⁷	6.8 × 10⁻⁶
USPL1	10208	A8K1B1	0.2	7.4 × 10⁻⁴	6.7 × 10⁻³
SLC44A2	57153	A0A088QCU6	0.2	2.8 × 10⁻⁴	3.1 × 10⁻³
TMEM87B	84910	Q96K49	0.2	7.4 × 10⁻³	3.8 × 10⁻²
PRXL2C	195827	Q7RTV5	0.2	3.5 × 10⁻³	2.2 × 10⁻²
HOMER1	9456	Q86YM7	0.2	1.1 × 10⁻⁵	2.3 × 10⁻⁴
DNAJB1	3337	P25685	0.2	3.1 × 10⁻⁸	1.7 × 10⁻⁶
UBE3B	89910	Q7Z3V4	0.2	2.1 × 10⁻⁴	2.5 × 10⁻³
CHTF8	54921	P0CG13	0.2	2.3 × 10⁻³	1.6 × 10⁻²
MRC2	9902	Q9UBG0	0.2	2.3 × 10⁻⁴	2.7 × 10⁻³
ZNF468	90333	Q5VIY5	0.2	4.6 × 10⁻³	2.7 × 10⁻²
LRP11	84918	B4DS68	0.2	5.8 × 10⁻⁶	1.3 × 10⁻⁴
ZNF107	51427	A0A024R5Y9	0.2	7.1 × 10⁻⁵	1.0 × 10⁻³
KIF15	56992	Q9NS87	0.2	4.1 × 10⁻⁶	9.8 × 10⁻⁵
BAZ2B	29994	Q9UIF8	0.2	1.0 × 10⁻³	8.4 × 10⁻³
SPPL3	121665	Q8TCT6	0.2	1.7 × 10⁻⁴	2.1 × 10⁻³
EPB41L5	57669	Q9HCM4	0.2	2.0 × 10⁻⁴	2.4 × 10⁻³
ZNF566	84924	Q969W8	0.2	8.2 × 10⁻³	4.1 × 10⁻²
GSTZ1	2954	O43708	0.2	2.4 × 10⁻³	1.7 × 10⁻²
GID4	79018	B3KXL6	0.2	1.1 × 10⁻³	9.0 × 10⁻³
TOGARAM1	23116	Q9Y4F4	0.2	3.4 × 10⁻⁴	3.7 × 10⁻³
CFAP97	57587	Q9P2B7	0.2	3.3 × 10⁻⁶	8.1 × 10⁻⁵
ALKBH7	84266	Q9BT30	0.2	2.6 × 10⁻³	1.8 × 10⁻²
GATB	5188	O75879	0.2	4.7 × 10⁻⁴	4.7 × 10⁻³
ZNF28	7576	P17035	0.2	5.8 × 10⁻³	3.2 × 10⁻²
GALK2	2585	Q01415	0.2	2.9 × 10⁻³	1.9 × 10⁻²
DUSP16	80824	A0A024RAR2	0.2	8.0 × 10⁻⁶	1.7 × 10⁻⁴
ALDH4A1	8659	P30038	0.2	7.2 × 10⁻³	3.7 × 10⁻²
POFUT2	23275	Q9Y2G5	0.2	1.4 × 10⁻³	1.1 × 10⁻²
PLCH1	23007	Q4KWH8	0.2	7.9 × 10⁻⁴	7.1 × 10⁻³
KIAA1958	158405	Q8N8K9	0.2	7.4 × 10⁻³	3.8 × 10⁻²
CITED2	10370	D9ZGF1	0.2	6.4 × 10⁻⁵	9.5 × 10⁻⁴
ABHD18	80167	Q0P651	0.2	4.2 × 10⁻³	2.5 × 10⁻²
CHST14	113189	Q8NCH0	0.2	2.2 × 10⁻³	1.6 × 10⁻²
GNB1L	54584	Q9BYB4	0.2	2.1 × 10⁻³	1.5 × 10⁻²
ZNF615	284370	Q8N8J6	0.2	5.7 × 10⁻³	3.1 × 10⁻²
FER	2241	P16591	0.2	1.9 × 10⁻⁶	5.1 × 10⁻⁵
CLK4	57396	Q9HAZ1	0.2	7.5 × 10⁻³	3.8 × 10⁻²
SIX1	6495	Q15475	0.2	1.7 × 10⁻⁷	6.8 × 10⁻⁶
ABHD3	171586	J3KTE1	0.2	5.3 × 10⁻⁴	5.2 × 10⁻³
SESN1	27244	Q9Y6P5	0.2	6.6 × 10⁻⁶	1.5 × 10⁻⁴
DNAJB2	3300	P25686	0.2	7.5 × 10⁻³	3.8 × 10⁻²
ZNF738	148203		0.2	3.4 × 10⁻³	2.1 × 10⁻²
ZFP90	146198	Q8TF47	0.2	9.3 × 10⁻⁴	8.0 × 10⁻³
ZNF184	7738	A0A024RCM2	0.2	6.9 × 10⁻⁴	6.3 × 10⁻³
TM7SF2	7108	O76062	0.3	8.1 × 10⁻⁴	7.2 × 10⁻³
PANK1	53354	Q8TE04	0.3	4.5 × 10⁻⁴	4.5 × 10⁻³
ADAMTS1	9510	B2RB33	0.3	4.1 × 10⁻⁸	2.2 × 10⁻⁶
MANSC1	54682	Q9H8J5	0.3	1.1 × 10⁻²	4.9 × 10⁻²
CCNG2	901	A0A024RDC7	0.3	1.5 × 10⁻³	1.1 × 10⁻²
IDH2	3418	P48735	0.3	1.8 × 10⁻⁶	4.9 × 10⁻⁵
CDKN2B	1030	K7PPU3	0.3	8.7 × 10⁻⁴	7.6 × 10⁻³
ZNF136	7695	B4DS70	0.3	3.9 × 10⁻³	2.4 × 10⁻²
BRF2	55290	Q9HAW0	0.3	5.2 × 10⁻³	3.0 × 10⁻²
BEND3	57673	Q5T5X7	0.3	9.3 × 10⁻⁴	8.1 × 10⁻³
TMEM242	729515	Q9NWH2	0.3	6.3 × 10⁻⁴	5.9 × 10⁻³
NSUN3	63899	Q9H649	0.3	7.3 × 10⁻³	3.7 × 10⁻²
RND2	8153	P52198	0.3	5.3 × 10⁻⁴	5.2 × 10⁻³
AAMDC	28971	K4DI89	0.3	2.2 × 10⁻³	1.6 × 10⁻²
FBXL14	144699	Q8N1E6	0.3	8.5 × 10⁻⁵	1.2 × 10⁻³
RPIA	22934	P49247	0.3	3.3 × 10⁻³	2.1 × 10⁻²
TCTN1	79600	B4DIB9	0.3	1.9 × 10⁻³	1.4 × 10⁻²
ZNF100	163227	Q8IYN0	0.3	1.3 × 10⁻⁴	1.7 × 10⁻³
SLC43A2	124935	Q8N370	0.3	2.7 × 10⁻³	1.8 × 10⁻²
TPGS1	91978	Q6ZTW0	0.3	2.2 × 10⁻³	1.6 × 10⁻²
KLF10	7071	Q13118	0.3	1.1 × 10⁻³	9.3 × 10⁻³
PPTC7	160760	Q8NI37	0.3	4.6 × 10⁻⁴	4.6 × 10⁻³
B4GALT5	9334	O43286	0.3	1.1 × 10⁻⁶	3.3 × 10⁻⁵
TRNT1	51095	Q96Q11	0.3	5.5 × 10⁻⁴	5.3 × 10⁻³
TRAPPC9	83696	Q96Q05	0.3	2.5 × 10⁻³	1.7 × 10⁻²
LGALS3BP	3959	A0A0S2Z3Y1	0.3	5.6 × 10⁻³	3.1 × 10⁻²
AEN	64782	Q8WTP8	0.3	5.2 × 10⁻¹⁰	5.1 × 10⁻⁸
SELENOW	6415	P63302	0.3	6.1 × 10⁻⁵	9.1 × 10⁻⁴
HOOK2	29911	Q96ED9	0.3	5.2 × 10⁻³	3.0 × 10⁻²
GS1-124K5.11	493754		0.3	1.7 × 10⁻³	1.3 × 10⁻²
SLC26A11	284129	Q86WA9	0.3	9.9 × 10⁻⁴	8.4 × 10⁻³
ZNF654	55279		0.3	1.9 × 10⁻³	1.4 × 10⁻²
SMDT1	91689	Q9H4I9	0.3	1.0 × 10⁻²	4.7 × 10⁻²
TP53INP1	94241	Q96A56	0.3	8.1 × 10⁻³	4.0 × 10⁻²
SMTN	6525	A0A087X1R1	0.3	2.6 × 10⁻⁵	4.6 × 10⁻⁴
DBP	1628	Q10586	0.3	5.9 × 10⁻⁴	5.6 × 10⁻³
ZNF608	57507	B3KPE6	0.3	2.5 × 10⁻⁴	2.9 × 10⁻³
MAPK7	5598	A0A024QZ20	0.3	3.3 × 10⁻³	2.1 × 10⁻²
PRPSAP1	5635	B4DP31	0.3	3.6 × 10⁻⁵	5.9 × 10⁻⁴
PSME1	5720	Q06323	0.3	9.2 × 10⁻⁶	2.0 × 10⁻⁴
ULK2	9706	Q8IYT8	0.3	5.1 × 10⁻⁴	5.1 × 10⁻³
SERTAD3	29946	A0A024R0N2	0.3	1.7 × 10⁻³	1.3 × 10⁻²
ZNF711	7552	Q9Y462	0.3	5.2 × 10⁻¹⁰	5.1 × 10⁻⁸
PDCD7	10081	Q6IEG3	0.3	7.1 × 10⁻⁶	1.6 × 10⁻⁴
NIPA1	123606	A0A024R344	0.3	1.3 × 10⁻⁵	2.6 × 10⁻⁴
CNNM2	54805	Q9H8M5	0.3	9.3 × 10⁻⁵	1.3 × 10⁻³
N6AMT1	29104	Q9Y5N5	0.3	4.8 × 10⁻³	2.8 × 10⁻²
LOC100419583	100419583		0.3	5.9 × 10⁻³	3.2 × 10⁻²
TTBK2	146057	Q6IQ55	0.3	2.4 × 10⁻⁴	2.8 × 10⁻³
EPC1	80314	Q9H2F5	0.3	1.0 × 10⁻⁴	1.4 × 10⁻³
ALX1	8092	Q15699	0.3	1.6 × 10⁻³	1.2 × 10⁻²
BAX	581	Q07812	0.3	1.2 × 10⁻⁸	8.0 × 10⁻⁷
ZNF57	126295	A5HJR3	0.3	2.8 × 10⁻³	1.9 × 10⁻²
REXO5	81691	Q96IC2	0.3	4.4 × 10⁻³	2.6 × 10⁻²
CERT1	10087	Q9Y5P4	0.3	2.3 × 10⁻⁵	4.1 × 10⁻⁴
MAGEA1	4100	P43355	0.3	7.2 × 10⁻⁴	6.5 × 10⁻³
C12orf57	113246	Q99622	0.3	8.9 × 10⁻⁵	1.2 × 10⁻³
ENPEP	2028	Q07075	0.3	6.8 × 10⁻³	3.5 × 10⁻²
ZNF8	7554	B3KS94	0.3	3.0 × 10⁻⁴	3.3 × 10⁻³
SPINT2	10653	A0A140VJV6	0.3	9.8 × 10⁻⁷	3.0 × 10⁻⁵
ARRDC3	57561	Q96B67	0.3	5.1 × 10⁻⁴	5.1 × 10⁻³
ZNF888	388559	A0A1W2PQ69	0.3	9.3 × 10⁻³	4.5 × 10⁻²
WDPCP	51057	O95876	0.3	1.1 × 10⁻²	5.0 × 10⁻²
SELENOP	6414	P49908	0.3	8.9 × 10⁻⁵	1.2 × 10⁻³
PHTF1	10745	Q9UMS5	0.3	1.9 × 10⁻⁷	7.4 × 10⁻⁶
ICA1L	130026	A0A024R3W3	0.3	3.8 × 10⁻³	2.3 × 10⁻²
ZNF91	7644	Q05481	0.3	3.3 × 10⁻⁵	5.5 × 10⁻⁴
METTL7A	25840	A0A024R118	0.3	4.0 × 10⁻⁷	1.4 × 10⁻⁵
ZNF607	84775	Q96SK3	0.4	1.7 × 10⁻⁵	3.3 × 10⁻⁴
SLC12A4	6560	B4DF30	0.4	8.3 × 10⁻⁵	1.2 × 10⁻³
ZNF333	84449	Q96JL9	0.4	6.9 × 10⁻³	3.6 × 10⁻²
GRHL1	29841	Q9NZI5	0.4	2.8 × 10⁻³	1.9 × 10⁻²
MPND	84954	Q8N594	0.4	4.4 × 10⁻³	2.6 × 10⁻²
FCGRT	2217	A0A024QZI2	0.4	2.3 × 10⁻⁴	2.7 × 10⁻³
ZNF112	7771	Q9UJU3	0.4	4.2 × 10⁻³	2.5 × 10⁻²
IFT88	8100	B3KX42	0.4	2.9 × 10⁻⁴	3.2 × 10⁻³
RABL2B	11158	Q9UNT1	0.4	3.0 × 10⁻³	2.0 × 10⁻²
NRAV	100506668		0.4	4.1 × 10⁻³	2.5 × 10⁻²
RAD52	5893	P43351	0.4	1.3 × 10⁻⁴	1.7 × 10⁻³
FAT4	79633	B3KU84	0.4	1.6 × 10⁻⁷	6.5 × 10⁻⁶
TENM1	10178	Q9UKZ4	0.4	1.6 × 10⁻⁵	3.1 × 10⁻⁴
ADAMTS5	11096	Q9UNA0	0.4	1.9 × 10⁻³	1.4 × 10⁻²
RIBC2	26150	A0A087X0F7	0.4	8.3 × 10⁻³	4.1 × 10⁻²
SEMA3C	10512	Q99985	0.4	3.2 × 10⁻⁷	1.1 × 10⁻⁵
PCDH19	57526	B3KU71	0.4	2.0 × 10⁻³	1.4 × 10⁻²
KCTD11	147040	A0A158RFT7	0.4	4.5 × 10⁻³	2.6 × 10⁻²
RPS27L	51065	Q71UM5	0.4	6.5 × 10⁻¹⁰	6.2 × 10⁻⁸
DPP7	29952	Q9UHL4	0.4	1.0 × 10⁻²	4.7 × 10⁻²
DHRS1	115817	Q96LJ7	0.4	6.4 × 10⁻⁴	6.0 × 10⁻³
ZNF443	10224	Q9Y2A4	0.4	1.2 × 10⁻³	9.8 × 10⁻³
ZFP28	140612	Q8NHY6	0.4	6.4 × 10⁻³	3.4 × 10⁻²
ZNF524	147807	Q96C55	0.4	1.0 × 10⁻²	4.7 × 10⁻²
MBNL1-AS1	401093		0.5	1.5 × 10⁻³	1.1 × 10⁻²
BBC3	27113	Q96PG8	0.5	1.2 × 10⁻⁵	2.5 × 10⁻⁴
ZNF793	390927	Q6ZN11	0.5	5.2 × 10⁻³	3.0 × 10⁻²
[truncated: 50 more rows]

## Sheet: Proteomics
Symbol	EntrezID	Uniprot	logFC (A677G/WT)	p-value	q-value
ABAT	18	P80404	-21.1	1.7 × 10⁻⁷	2.1 × 10⁻⁵
GLRA3	8001	O75311	-21.0	2.2 × 10⁻⁸	1.0 × 10⁻⁵
PIM1	5292	P11309	-21.0	2.8 × 10⁻⁸	1.0 × 10⁻⁵
CBX4	8535	O00257	-20.9	1.6 × 10⁻⁸	1.0 × 10⁻⁵
P3H4	10609	Q92791	-20.9	4.4 × 10⁻⁶	1.7 × 10⁻⁴
TBX3	6926	O15119	-20.9	3.5 × 10⁻⁸	1.0 × 10⁻⁵
TBC1D24	57465	Q9ULP9	-20.8	7.1 × 10⁻⁸	1.4 × 10⁻⁵
SLC35A1	10559	P78382	-20.2	2.5 × 10⁻⁸	1.0 × 10⁻⁵
ELF1	1997	P32519	-20.0	2.6 × 10⁻⁸	1.0 × 10⁻⁵
GATA2	2624	P23769	-19.9	3.1 × 10⁻⁷	2.6 × 10⁻⁵
SEMA6A	57556	Q9H2E6	-19.8	3.7 × 10⁻⁸	1.0 × 10⁻⁵
FAM107B	83641	Q9H098	-19.7	3.5 × 10⁻⁸	1.0 × 10⁻⁵
UROS	7390	P10746	-19.3	2.7 × 10⁻⁷	2.3 × 10⁻⁵
POLR3GL	84265	Q9BT43	-19.0	1.3 × 10⁻⁶	7.3 × 10⁻⁵
BCAM	4059	P50895	-18.8	4.9 × 10⁻⁶	1.9 × 10⁻⁴
BAP1	8314	Q92560	-17.7	1.1 × 10⁻³	2.7 × 10⁻²
RAB12	201475	Q6IQ22	-3.0	1.7 × 10⁻⁴	5.2 × 10⁻³
ECD	11319	O95905	-2.3	2.4 × 10⁻⁴	7.1 × 10⁻³
SLC12A7	10723	Q9Y666	-2.2	2.1 × 10⁻³	4.4 × 10⁻²
IL17RA	23765	Q96F46	-1.9	7.2 × 10⁻⁴	1.9 × 10⁻²
MFAP1	4236	P55081	-1.8	2.6 × 10⁻⁵	9.0 × 10⁻⁴
RC3H1	149041	Q5TC82	-1.6	2.0 × 10⁻³	4.4 × 10⁻²
OSBPL9	114883	Q96SU4	-1.2	2.9 × 10⁻⁴	8.5 × 10⁻³
NSFL1C	55968	Q9UNZ2	-1.0	1.0 × 10⁻⁴	3.2 × 10⁻³
CA2	760	P00918	-0.9	4.6 × 10⁻⁴	1.3 × 10⁻²
DAG1	1605	Q14118	-0.9	1.0 × 10⁻³	2.5 × 10⁻²
ACADM	34	P11310	-0.9	5.4 × 10⁻⁴	1.4 × 10⁻²
SRSF7	6432	Q16629	-0.8	6.2 × 10⁻⁴	1.6 × 10⁻²
LUC7L2	51631	Q9Y383	-0.7	8.0 × 10⁻⁴	2.1 × 10⁻²
CLPB	81570	Q9H078	-0.7	1.5 × 10⁻³	3.5 × 10⁻²
TCEA1	6917	P23193	-0.6	2.0 × 10⁻³	4.3 × 10⁻²
NEFM	4741	P07197	-0.5	1.9 × 10⁻³	4.2 × 10⁻²
FAM50A	9130	Q14320	-0.5	7.5 × 10⁻⁴	1.9 × 10⁻²
MKI67	4288	P46013	-0.5	2.0 × 10⁻³	4.4 × 10⁻²
AK2	204	P54819	-0.5	1.6 × 10⁻³	3.6 × 10⁻²
LMNB1	4001	P20700	-0.4	2.2 × 10⁻³	4.6 × 10⁻²
RPS24	6229	P62847	0.6	1.4 × 10⁻³	3.2 × 10⁻²
PRPF38B	55119	Q5VTL8	0.8	2.4 × 10⁻³	4.9 × 10⁻²
LPCAT1	79888	Q8NF37	0.9	2.0 × 10⁻³	4.4 × 10⁻²
ASB3	51130	Q9Y575	0.9	2.0 × 10⁻³	4.4 × 10⁻²
RPP38	10557	P78345	1.1	9.8 × 10⁻⁴	2.4 × 10⁻²
IPO8	10526	O15397	1.3	1.1 × 10⁻³	2.6 × 10⁻²
NBN	4683	O60934	1.3	6.8 × 10⁻⁴	1.8 × 10⁻²
TUBA1A	7846	Q71U36	1.4	2.4 × 10⁻³	4.9 × 10⁻²
WDTC1	23038	Q8N5D0	1.6	1.4 × 10⁻³	3.3 × 10⁻²
CC2D1A	54862	Q6P1N0	1.6	2.4 × 10⁻³	4.9 × 10⁻²
NDUFA13	51079	Q9P0J0	1.7	2.1 × 10⁻³	4.4 × 10⁻²
RASA1	5921	P20936	1.8	1.5 × 10⁻³	3.5 × 10⁻²
LSM1	27257	O15116	1.8	5.0 × 10⁻⁴	1.4 × 10⁻²
SEPTIN6	23157	Q14141	1.9	8.2 × 10⁻⁴	2.1 × 10⁻²
TSPYL1	7259	Q9H0U9	1.9	2.3 × 10⁻⁴	7.0 × 10⁻³
SCAMP4	113178	Q969E2	1.9	4.8 × 10⁻⁵	1.6 × 10⁻³
ERVK3-1	105372481	B3KNS4	2.0	2.2 × 10⁻³	4.6 × 10⁻²
PIAS3	10401	Q9Y6X2	2.0	1.1 × 10⁻³	2.6 × 10⁻²
WBP4	11193	O75554	2.1	1.9 × 10⁻³	4.2 × 10⁻²
ACBD6	84320	Q9BR61	2.1	1.2 × 10⁻³	2.9 × 10⁻²
TBC1D2B	23102	Q9UPU7	2.2	4.8 × 10⁻⁴	1.3 × 10⁻²
PALD1	27143	Q9ULE6	2.3	3.0 × 10⁻⁴	8.9 × 10⁻³
CASP8	841	Q14790	2.3	3.4 × 10⁻⁴	9.9 × 10⁻³
SCRN3	79634	Q0VDG4	2.4	6.9 × 10⁻⁴	1.8 × 10⁻²
GTF2H3	2967	Q13889	2.4	9.5 × 10⁻⁴	2.4 × 10⁻²
RPLP1	6176	P05386	2.4	4.8 × 10⁻⁵	1.6 × 10⁻³
STAM2	10254	O75886	2.4	2.0 × 10⁻³	4.4 × 10⁻²
TTC33	23548	Q6PID6	2.5	2.2 × 10⁻³	4.6 × 10⁻²
TOR1B	27348	O14657	2.6	9.0 × 10⁻⁴	2.3 × 10⁻²
NECTIN2	5819	Q92692	2.6	3.3 × 10⁻⁴	9.6 × 10⁻³
ZMYM2	7750	Q9UBW7	2.7	4.4 × 10⁻⁴	1.2 × 10⁻²
CCNA2	890	P20248	2.8	1.7 × 10⁻³	4.0 × 10⁻²
FRYL	285527	O94915	3.0	1.7 × 10⁻⁴	5.2 × 10⁻³
KDM4A	9682	O75164	3.3	1.0 × 10⁻⁴	3.2 × 10⁻³
VPS41	27072	P49754	3.6	5.0 × 10⁻⁴	1.4 × 10⁻²
RNF213	57674	Q63HN8	3.8	1.5 × 10⁻³	3.5 × 10⁻²
CLN3	1201	Q13286	18.0	1.4 × 10⁻³	3.2 × 10⁻²
NDUFAF6	137682	Q330K2	18.0	9.7 × 10⁻⁴	2.4 × 10⁻²
TOR2A	27433	Q5JU69	18.1	4.6 × 10⁻⁴	1.3 × 10⁻²
TEAD1	7003	P28347	18.2	4.0 × 10⁻⁴	1.1 × 10⁻²
LTO1	220064	Q8WV07	18.2	3.1 × 10⁻⁴	9.0 × 10⁻³
TAF3	83860	Q5VWG9	18.3	1.3 × 10⁻⁴	4.0 × 10⁻³
POMP	51371	Q9Y244	18.4	6.5 × 10⁻⁵	2.1 × 10⁻³
GPATCH2	55105	Q9NW75	18.4	8.6 × 10⁻⁵	2.8 × 10⁻³
ITPKA	3706	P23677	18.6	2.8 × 10⁻⁵	9.6 × 10⁻⁴
RNF149	284996	Q8NC42	18.6	3.9 × 10⁻⁵	1.3 × 10⁻³
VEZF1	7716	Q14119	18.6	2.0 × 10⁻⁵	6.9 × 10⁻⁴
CPNE2	221184	Q96FN4	18.6	2.1 × 10⁻⁵	7.3 × 10⁻⁴
VMP1	81671	Q96GC9	18.7	8.8 × 10⁻⁶	3.2 × 10⁻⁴
SLC23A2	9962	Q9UGH3	18.8	6.3 × 10⁻⁶	2.3 × 10⁻⁴
SHKBP1	92799	Q8TBC3	18.9	6.4 × 10⁻⁶	2.3 × 10⁻⁴
ANTKMT	65990	Q9BQD7	18.9	2.7 × 10⁻⁶	1.2 × 10⁻⁴
GJA3	2700	Q9Y6H8	18.9	4.2 × 10⁻⁶	1.7 × 10⁻⁴
ZNF711	7552	Q9Y462	18.9	4.5 × 10⁻⁶	1.8 × 10⁻⁴
ALG8	79053	Q9BVK2	18.9	6.5 × 10⁻⁶	2.4 × 10⁻⁴
KLHL22	84861	Q53GT1	18.9	3.1 × 10⁻⁶	1.4 × 10⁻⁴
ARHGAP19	84986	Q14CB8	19.0	5.5 × 10⁻⁶	2.1 × 10⁻⁴
MKS1	54903	Q9NXB0	19.0	2.7 × 10⁻⁶	1.2 × 10⁻⁴
ASB6	140459	Q9NWX5	19.0	2.3 × 10⁻⁶	1.1 × 10⁻⁴
ACADL	33	P28330	19.1	1.9 × 10⁻⁶	9.6 × 10⁻⁵
SDHAF2	54949	Q9NX18	19.1	2.7 × 10⁻⁶	1.2 × 10⁻⁴
LYSMD3	116068	Q7Z3D4	19.1	1.9 × 10⁻⁶	9.6 × 10⁻⁵
WRN	7486	Q14191	19.1	1.7 × 10⁻⁶	9.2 × 10⁻⁵
TRADD	8717	Q15628	19.1	2.5 × 10⁻⁶	1.1 × 10⁻⁴
SHCBP1	79801	Q8NEM2	19.1	1.8 × 10⁻⁶	9.3 × 10⁻⁵
GLT8D1	55830	Q68CQ7	19.1	3.5 × 10⁻⁶	1.5 × 10⁻⁴
WLS	79971	Q5T9L3	19.1	2.2 × 10⁻⁶	1.0 × 10⁻⁴
SAV1	60485	Q9H4B6	19.2	8.0 × 10⁻⁷	5.3 × 10⁻⁵
APOC3	345	P02656	19.2	7.4 × 10⁻⁷	5.3 × 10⁻⁵
PRNP	5621	P04156	19.2	8.3 × 10⁻⁷	5.3 × 10⁻⁵
MSRA	4482	Q9UJ68	19.3	7.6 × 10⁻⁷	5.3 × 10⁻⁵
MAP3K20	51776	Q9NYL2	19.3	2.7 × 10⁻⁶	1.2 × 10⁻⁴
EFCAB3	146779	Q8N7B9	19.4	6.0 × 10⁻⁷	4.4 × 10⁻⁵
ANGEL1	23357	Q9UNK9	19.4	8.0 × 10⁻⁷	5.3 × 10⁻⁵
PIP4P1	90809	Q86T03	19.4	1.8 × 10⁻⁷	2.2 × 10⁻⁵
SCRN2	90507	Q96FV2	19.5	4.2 × 10⁻⁷	3.3 × 10⁻⁵
DSC3	1825	Q14574	19.5	9.0 × 10⁻⁷	5.6 × 10⁻⁵
MAN1A1	4121	P33908	19.5	3.4 × 10⁻⁶	1.4 × 10⁻⁴
STK17B	9262	O94768	19.6	4.8 × 10⁻⁷	3.7 × 10⁻⁵
EPHX2	2053	P34913	19.6	3.4 × 10⁻⁶	1.4 × 10⁻⁴
PNPLA2	57104	Q96AD5	19.7	8.9 × 10⁻⁷	5.6 × 10⁻⁵
UXT	8409	Q9UBK9	19.8	2.2 × 10⁻⁷	2.3 × 10⁻⁵
MTX3	345778	Q5HYI7	19.8	2.0 × 10⁻⁷	2.2 × 10⁻⁵
MED22	6837	Q15528	19.9	5.7 × 10⁻⁷	4.2 × 10⁻⁵
TCP11L1	55346	Q9NUJ3	19.9	5.1 × 10⁻⁷	3.9 × 10⁻⁵
CBLL1	79872	Q75N03	19.9	5.8 × 10⁻⁸	1.4 × 10⁻⁵
SLC16A10	117247	Q8TF71	19.9	9.0 × 10⁻⁸	1.4 × 10⁻⁵
TRUB2	26995	O95900	20.0	3.2 × 10⁻⁶	1.4 × 10⁻⁴
ICMT	23463	O60725	20.0	8.7 × 10⁻⁸	1.4 × 10⁻⁵
SPOP	8405	O43791	20.0	2.7 × 10⁻⁷	2.3 × 10⁻⁵
MIS12	79003	Q9H081	20.0	1.8 × 10⁻⁶	9.5 × 10⁻⁵
ITGA1	3672	P56199	20.0	2.4 × 10⁻⁸	1.0 × 10⁻⁵
KIF5C	3800	O60282	20.1	1.2 × 10⁻⁷	1.6 × 10⁻⁵
RBM41	55285	Q96IZ5	20.1	5.5 × 10⁻⁶	2.1 × 10⁻⁴
MED30	90390	Q96HR3	20.1	2.0 × 10⁻⁶	9.9 × 10⁻⁵
MAN1A2	10905	O60476	20.2	1.0 × 10⁻⁶	6.1 × 10⁻⁵
ABCC5	10057	O15440	20.2	1.6 × 10⁻⁵	5.5 × 10⁻⁴
RBPMS	11030	Q93062	20.3	1.3 × 10⁻⁶	7.3 × 10⁻⁵
KIF18B	146909	Q86Y91	20.4	9.9 × 10⁻⁸	1.4 × 10⁻⁵
UXS1	80146	Q8NBZ7	20.4	1.3 × 10⁻⁶	7.3 × 10⁻⁵
FOXK2	3607	Q01167	20.5	9.1 × 10⁻⁸	1.4 × 10⁻⁵
GTF2A1	2957	P52655	20.5	1.5 × 10⁻⁸	1.0 × 10⁻⁵
BMPR2	659	Q13873	20.5	1.3 × 10⁻⁶	7.3 × 10⁻⁵
JADE3	9767	Q92613	20.6	1.6 × 10⁻⁸	1.0 × 10⁻⁵
KMT2C	58508	Q8NEZ4	20.6	1.1 × 10⁻⁶	6.4 × 10⁻⁵
PSMG4	389362	Q5JS54	20.6	2.6 × 10⁻⁷	2.3 × 10⁻⁵
CRAT	1384	P43155	20.7	6.2 × 10⁻⁸	1.4 × 10⁻⁵
PASK	23178	Q96RG2	20.8	1.3 × 10⁻⁶	7.3 × 10⁻⁵
ZHX3	23051	Q9H4I2	20.9	2.3 × 10⁻⁶	1.1 × 10⁻⁴
ITGAV	3685	P06756	20.9	1.9 × 10⁻⁶	9.6 × 10⁻⁵
TMEM222	84065	Q9H0R3	20.9	8.7 × 10⁻⁸	1.4 × 10⁻⁵
CNOT11	55571	Q9UKZ1	21.0	2.7 × 10⁻⁷	2.3 × 10⁻⁵
C16orf91	283951	Q4G0I0	21.1	6.1 × 10⁻⁶	2.3 × 10⁻⁴
SPINDOC	144097	Q9BUA3	21.1	7.9 × 10⁻⁷	5.3 × 10⁻⁵
FNDC3B	64778	Q53EP0	21.2	1.5 × 10⁻⁷	1.9 × 10⁻⁵
STAT2	6773	P52630	21.3	7.3 × 10⁻⁸	1.4 × 10⁻⁵
WDCP	80304	Q9H6R7	21.4	3.9 × 10⁻⁸	1.0 × 10⁻⁵
MED7	9443	O43513	21.4	2.0 × 10⁻⁷	2.2 × 10⁻⁵
TMEM256	254863	Q8N2U0	21.5	2.2 × 10⁻⁷	2.3 × 10⁻⁵
JTB	10899	O76095	21.5	3.1 × 10⁻⁷	2.6 × 10⁻⁵
SUSD5	26032	O60279	21.7	2.6 × 10⁻⁷	2.3 × 10⁻⁵
FDX2	112812	Q6P4F2	21.8	4.2 × 10⁻⁶	1.7 × 10⁻⁴
NKX2-4	644524	Q9H2Z4	21.9	2.0 × 10⁻⁷	2.2 × 10⁻⁵
E2F3	1871	O00716	22.0	8.9 × 10⁻⁸	1.4 × 10⁻⁵
ISOC2	79763	Q96AB3	22.3	1.2 × 10⁻⁷	1.6 × 10⁻⁵
NDUFB1	4707	O75438	22.4	2.4 × 10⁻⁷	2.3 × 10⁻⁵
FBXW9	84261	Q5XUX1	22.7	3.0 × 10⁻⁸	1.0 × 10⁻⁵
ACTBL2	345651	Q562R1	25.2	4.2 × 10⁻⁵	1.4 × 10⁻³

## Sheet: Metabolomics
HMDB	Name	logFC (A677G/WT)	p-value	q-value	ESI mode
HMDB0001511	Phosphocreatine	1.6	1.6 × 10⁻⁴	9.0 × 10⁻³	neg
HMDB0000086	Glycerophosphocholine	0.8	3.5 × 10⁻⁴	9.2 × 10⁻³	neg
HMDB0000285	UTP	0.8	1.9 × 10⁻⁴	9.0 × 10⁻³	neg
HMDB0028815	Glutamylaspartic acid	0.7	3.6 × 10⁻⁴	9.2 × 10⁻³	neg
HMDB0000902	NAD+	0.7	2.1 × 10⁻³	2.8 × 10⁻²	neg
HMDB0000302	Uridine 5'-diphosphogalactose	0.5	1.2 × 10⁻³	2.1 × 10⁻²	neg
HMDB0000538	ATP	0.5	3.4 × 10⁻³	4.1 × 10⁻²	neg
HMDB0000125	Glutathione reduced	0.3	4.9 × 10⁻⁴	1.0 × 10⁻²	neg
HMDB0032055	N-Acetylhistidine	0.9	6.5 × 10⁻⁴	2.5 × 10⁻²	pos
HMDB0060244	Phosphodimethylethanolamine	0.8	4.8 × 10⁻⁵	4.4 × 10⁻³	pos
HMDB0006049	O-Phosphotyrosine	0.6	8.4 × 10⁻⁴	2.5 × 10⁻²	pos
HMDB0000114	Glycerylphosphorylethanolamine	0.5	1.3 × 10⁻³	3.2 × 10⁻²	pos
HMDB0001565	Phosphorylcholine	0.4	3.3 × 10⁻³	4.9 × 10⁻²	pos
HMDB0000883	L-Valine	0.4	2.8 × 10⁻⁵	4.4 × 10⁻³	pos
HMDB0240732	Valine betaine	0.4	3.6 × 10⁻³	4.9 × 10⁻²	pos
