# Supplementary material for: Integrative Multi-Omics Analysis of Oncogenic EZH2 Mutants: From Epigenetic Reprogramming to Molecular Signatures
Source: Int J Mol Sci. 2023 Jul 12;24(14):11378. doi: 10.3390/ijms241411378 (PMC10380343; doi:10.3390/ijms241411378)
Supplement: Supplementary file 1 [file ijms-24-11378-s001.zip › Supplementary_Table_S4.xlsx]

## Sheet: RNA-Seq
Symbol	EntrezID	Uniprot	logFC (Y641F/WT)	p-value	q-value
FAM163A	148753	Q96GL9	-2.9	2.4 × 10⁻⁵	1.0 × 10⁻³
PGR	5241	P06401	-2.9	5.5 × 10⁻⁶	3.1 × 10⁻⁴
ST6GAL2	84620	Q96JF0	-2.6	1.1 × 10⁻⁵	5.6 × 10⁻⁴
WIF1	11197	Q9Y5W5	-2.3	1.2 × 10⁻⁴	3.4 × 10⁻³
NPFFR2	10886	A0PJM9	-2.3	9.3 × 10⁻⁵	2.9 × 10⁻³
FGFBP1	9982	Q14512	-2.2	4.2 × 10⁻⁵	1.6 × 10⁻³
KCND2	3751	A4D0V9	-2.2	1.3 × 10⁻⁷	1.6 × 10⁻⁵
NWD2	57495	Q9ULI1	-2.1	4.1 × 10⁻⁵	1.5 × 10⁻³
ANKRD36BP2	645784		-2.1	1.1 × 10⁻⁴	3.3 × 10⁻³
NPY5R	4889	Q15761	-2.1	1.1 × 10⁻⁵	5.6 × 10⁻⁴
RGS4	5999	P49798	-2.1	1.6 × 10⁻⁶	1.1 × 10⁻⁴
PDGFD	80310	Q9GZP0	-2.0	1.4 × 10⁻⁸	2.7 × 10⁻⁶
SYT9	143425	Q86SS6	-2.0	7.0 × 10⁻¹⁰	2.1 × 10⁻⁷
LMO3	55885	A0A024RAT1	-1.9	1.4 × 10⁻⁵	6.6 × 10⁻⁴
CD44	960	P16070	-1.9	6.4 × 10⁻⁴	1.3 × 10⁻²
MYRIP	25924	Q8NFW9	-1.9	1.6 × 10⁻⁴	4.5 × 10⁻³
KCNK2	3776	O95069	-1.9	5.0 × 10⁻¹⁰	1.7 × 10⁻⁷
RAB3C	115827	Q96E17	-1.9	2.2 × 10⁻⁴	5.5 × 10⁻³
RXRG	6258	A0A087WZ88	-1.9	2.0 × 10⁻⁸	3.4 × 10⁻⁶
TAC1	6863	P20366	-1.9	1.3 × 10⁻³	2.2 × 10⁻²
RIMS1	22999	Q3ZCW0	-1.9	1.3 × 10⁻⁴	3.7 × 10⁻³
NEGR1	257194	Q7Z3B1	-1.9	6.0 × 10⁻⁴	1.2 × 10⁻²
CYP7B1	9420	Q05C57	-1.9	5.2 × 10⁻⁴	1.1 × 10⁻²
NXPH2	11249	O95156	-1.8	1.1 × 10⁻⁴	3.3 × 10⁻³
IFIH1	64135	Q9BYX4	-1.8	3.7 × 10⁻⁵	1.4 × 10⁻³
SP110	3431	Q9HB58	-1.8	2.7 × 10⁻⁵	1.1 × 10⁻³
PTCHD4	442213	Q6ZW05	-1.8	8.5 × 10⁻⁴	1.6 × 10⁻²
CERKL	375298	Q49MI3	-1.8	1.3 × 10⁻⁴	3.7 × 10⁻³
MAL2	114569	A0A024R9E4	-1.8	7.1 × 10⁻⁷	5.7 × 10⁻⁵
CD1D	912	P15813	-1.7	1.9 × 10⁻⁵	8.5 × 10⁻⁴
VGLL2	245806	Q8N8G2	-1.7	4.2 × 10⁻⁶	2.5 × 10⁻⁴
GALNT5	11227	Q7Z7M9	-1.7	1.8 × 10⁻⁴	5.0 × 10⁻³
CLVS2	134829	Q5SYC1	-1.7	8.0 × 10⁻⁷	6.3 × 10⁻⁵
KCNQ1	3784	P51787	-1.7	9.5 × 10⁻⁴	1.7 × 10⁻²
PDE4B	5142	Q07343	-1.7	5.8 × 10⁻⁶	3.3 × 10⁻⁴
ABCC9	10060	A0A024RAV7	-1.7	9.5 × 10⁻⁴	1.7 × 10⁻²
AVPR1A	552	P37288	-1.7	3.4 × 10⁻⁴	8.0 × 10⁻³
PTPRO	5800	Q16827	-1.6	1.1 × 10⁻⁴	3.3 × 10⁻³
SLC35F3	148641	Q8IY50	-1.6	1.2 × 10⁻³	2.0 × 10⁻²
NHLH2	4808	A0A024R0I7	-1.6	9.5 × 10⁻⁷	7.2 × 10⁻⁵
WNT16	51384	E9PH60	-1.6	3.3 × 10⁻³	4.2 × 10⁻²
SLCO3A1	28232	Q9UIG8	-1.6	4.2 × 10⁻⁴	9.4 × 10⁻³
STAC	6769	B4DR96	-1.6	2.1 × 10⁻⁸	3.4 × 10⁻⁶
NPY1R	4886	P25929	-1.6	6.7 × 10⁻⁸	8.9 × 10⁻⁶
CHST4	10164	Q8NCG5	-1.6	1.1 × 10⁻³	1.9 × 10⁻²
ZNF365	22891	Q70YC5	-1.6	2.0 × 10⁻⁶	1.3 × 10⁻⁴
FAM110C	642273	Q1W6H9	-1.6	4.9 × 10⁻⁴	1.1 × 10⁻²
EVA1A	84141	Q9H8M9	-1.6	3.0 × 10⁻⁴	7.1 × 10⁻³
PGM5	5239	Q15124	-1.5	2.1 × 10⁻⁵	9.1 × 10⁻⁴
PTPRZ1	5803	B4DFE7	-1.5	1.3 × 10⁻⁶	9.1 × 10⁻⁵
CNKSR2	22866	Q8WXI2	-1.5	2.3 × 10⁻⁵	9.7 × 10⁻⁴
BMP3	651	P12645	-1.5	3.3 × 10⁻⁴	7.7 × 10⁻³
SLC44A3-AS1	101928079		-1.5	2.6 × 10⁻³	3.6 × 10⁻²
PLPPR4	9890	Q7Z2D5	-1.5	3.7 × 10⁻⁷	3.5 × 10⁻⁵
TRPC4	7223	Q9UBN4	-1.5	2.9 × 10⁻³	3.8 × 10⁻²
RIPOR2	9750	Q9Y4F9	-1.5	7.7 × 10⁻⁴	1.5 × 10⁻²
SERTM1	400120	A2A2V5	-1.5	1.1 × 10⁻⁶	8.0 × 10⁻⁵
OAS3	4940	Q9Y6K5	-1.5	3.6 × 10⁻⁶	2.2 × 10⁻⁴
ST6GALNAC5	81849	B4DV27	-1.4	9.9 × 10⁻⁶	5.1 × 10⁻⁴
SYT14	255928	A1L3Y1	-1.4	2.5 × 10⁻⁹	6.5 × 10⁻⁷
KDR	3791	A0A024RD88	-1.4	3.0 × 10⁻³	3.9 × 10⁻²
SLIT3	6586	O75094	-1.4	2.7 × 10⁻⁶	1.7 × 10⁻⁴
AMPH	273	P49418	-1.4	7.2 × 10⁻¹⁰	2.1 × 10⁻⁷
NRXN1	9378	Q9ULB1	-1.4	5.4 × 10⁻⁵	1.9 × 10⁻³
CHRNA4	1137	B4DK78	-1.4	4.0 × 10⁻³	4.9 × 10⁻²
NHSL2	340527	A0A0J9YY34	-1.4	1.2 × 10⁻³	2.0 × 10⁻²
DCDC2	51473	Q9UHG0	-1.4	2.4 × 10⁻⁷	2.4 × 10⁻⁵
LSAMP	4045	B7Z661	-1.4	9.2 × 10⁻⁶	4.8 × 10⁻⁴
RPRM	56475	Q9NS64	-1.4	3.0 × 10⁻⁵	1.2 × 10⁻³
KCNV1	27012	Q6PIU1	-1.4	6.7 × 10⁻⁴	1.3 × 10⁻²
CTNNA3	29119	A8K141	-1.4	3.7 × 10⁻³	4.6 × 10⁻²
RGS7	6000	P49802	-1.4	4.5 × 10⁻⁴	1.0 × 10⁻²
SAMD9	54809	Q5K651	-1.3	5.7 × 10⁻⁵	2.0 × 10⁻³
DSEL	92126	Q8IZU8	-1.3	5.9 × 10⁻⁹	1.4 × 10⁻⁶
TENM4	26011	Q6N022	-1.3	1.1 × 10⁻⁷	1.4 × 10⁻⁵
SPOCK1	6695	Q08629	-1.3	2.7 × 10⁻³	3.7 × 10⁻²
ADCYAP1R1	117	A0A090N8F8	-1.3	1.8 × 10⁻¹¹	1.3 × 10⁻⁸
SYT13	57586	Q7L8C5	-1.3	7.0 × 10⁻⁵	2.3 × 10⁻³
KCNA3	3738	P22001	-1.3	2.6 × 10⁻⁴	6.4 × 10⁻³
NELL1	4745	B3KXR2	-1.3	6.0 × 10⁻⁵	2.1 × 10⁻³
GPR85	54329	A4D0T8	-1.3	2.8 × 10⁻⁶	1.8 × 10⁻⁴
TMEM229A	730130	B2RXF0	-1.3	1.0 × 10⁻³	1.8 × 10⁻²
NEXMIF	340533	Q5QGS0	-1.3	3.4 × 10⁻⁵	1.3 × 10⁻³
TOX3	27324	O15405	-1.3	2.3 × 10⁻⁷	2.4 × 10⁻⁵
TMEM163	81615	Q8TC26	-1.3	1.6 × 10⁻³	2.5 × 10⁻²
FAM181B	220382	A6NEQ2	-1.2	1.9 × 10⁻⁴	5.1 × 10⁻³
CRYM	1428	Q14894	-1.2	2.5 × 10⁻³	3.4 × 10⁻²
GBX1	2636	Q14549	-1.2	7.6 × 10⁻⁶	4.1 × 10⁻⁴
IL18R1	8809	Q13478	-1.2	4.5 × 10⁻⁸	6.3 × 10⁻⁶
PPP1R1A	5502	Q13522	-1.2	4.4 × 10⁻⁷	4.0 × 10⁻⁵
PRKG2	5593	B7ZA25	-1.2	1.2 × 10⁻⁶	8.8 × 10⁻⁵
SYTL2	54843	Q9HCH5	-1.2	1.8 × 10⁻⁴	4.9 × 10⁻³
SPOCK3	50859	Q9BQ16	-1.2	5.2 × 10⁻⁹	1.2 × 10⁻⁶
CHRDL1	91851	Q9BU40	-1.2	1.7 × 10⁻⁸	3.2 × 10⁻⁶
YBX2	51087	Q9Y2T7	-1.2	3.7 × 10⁻³	4.6 × 10⁻²
BICC1	80114	Q9H694	-1.2	2.2 × 10⁻¹³	3.5 × 10⁻¹⁰
RAB38	23682	A0A024R191	-1.2	1.4 × 10⁻⁶	9.9 × 10⁻⁵
FAM133A	286499	Q8N9E0	-1.2	3.6 × 10⁻³	4.5 × 10⁻²
ARNT2	9915	Q7Z3A3	-1.2	3.7 × 10⁻¹²	3.1 × 10⁻⁹
TOX	9760	O94900	-1.2	2.8 × 10⁻³	3.7 × 10⁻²
RUNX3	864	A0A024RAH4	-1.2	1.5 × 10⁻⁴	4.1 × 10⁻³
CYP2J2	1573	P51589	-1.2	2.6 × 10⁻⁶	1.7 × 10⁻⁴
OPRD1	4985	P41143	-1.2	2.8 × 10⁻³	3.7 × 10⁻²
DYNC1I1	1780	A4D1I7	-1.2	5.4 × 10⁻⁴	1.1 × 10⁻²
NR0B1	190	F1D8P4	-1.2	1.4 × 10⁻⁵	6.7 × 10⁻⁴
SLC9A2	6549	Q9UBY0	-1.2	3.2 × 10⁻⁶	2.0 × 10⁻⁴
DMRTA1	63951	Q5VZB9	-1.2	2.9 × 10⁻³	3.8 × 10⁻²
TSPAN2	10100	B1AKP1	-1.2	1.8 × 10⁻⁷	1.9 × 10⁻⁵
TTPA	7274	P49638	-1.2	1.4 × 10⁻³	2.3 × 10⁻²
NFASC	23114	O94856	-1.1	5.5 × 10⁻⁴	1.1 × 10⁻²
IRX6	79190	P78412	-1.1	4.2 × 10⁻³	5.0 × 10⁻²
PREX2	80243	Q70Z35	-1.1	2.4 × 10⁻¹¹	1.5 × 10⁻⁸
STX11	8676	O75558	-1.1	1.7 × 10⁻³	2.6 × 10⁻²
LGR5	8549	O75473	-1.1	4.6 × 10⁻¹⁰	1.7 × 10⁻⁷
SLC27A6	28965	Q9Y2P4	-1.1	2.7 × 10⁻⁵	1.1 × 10⁻³
PRRX1	5396	P54821	-1.1	5.8 × 10⁻⁵	2.0 × 10⁻³
VSNL1	7447	P62760	-1.1	1.1 × 10⁻⁴	3.4 × 10⁻³
TSLP	85480	Q969D9	-1.1	1.9 × 10⁻⁴	5.0 × 10⁻³
AGTR1	185	P30556	-1.1	9.5 × 10⁻⁵	2.9 × 10⁻³
FERMT1	55612	Q49AC8	-1.1	7.3 × 10⁻⁸	9.6 × 10⁻⁶
DKK1	22943	I1W660	-1.1	9.7 × 10⁻⁴	1.8 × 10⁻²
BEX5	340542	Q5H9J7	-1.1	5.4 × 10⁻⁷	4.7 × 10⁻⁵
KLK8	11202	A0A0A0MQY9	-1.1	1.2 × 10⁻³	2.0 × 10⁻²
SYT2	127833	A0A024R9B3	-1.1	1.3 × 10⁻⁶	9.3 × 10⁻⁵
PTCHD1	139411	Q96NR3	-1.1	2.0 × 10⁻⁴	5.2 × 10⁻³
COL4A4	1286	P53420	-1.1	3.7 × 10⁻⁴	8.5 × 10⁻³
NRG1	3084	A6MW56	-1.1	1.1 × 10⁻³	2.0 × 10⁻²
EPHA10	284656	Q4G0R4	-1.1	5.2 × 10⁻⁴	1.1 × 10⁻²
PALM2	114299	Q8IXS6	-1.1	9.3 × 10⁻⁶	4.8 × 10⁻⁴
B3GALT1	8708	Q9Y5Z6	-1.1	1.8 × 10⁻³	2.7 × 10⁻²
ETS1	2113	P14921	-1.1	3.2 × 10⁻¹⁰	1.2 × 10⁻⁷
ANO4	121601	B7Z9Z0	-1.1	6.2 × 10⁻⁵	2.1 × 10⁻³
SPON1	10418	Q9HCB6	-1.1	2.8 × 10⁻¹³	4.0 × 10⁻¹⁰
AMIGO2	347902	A0A024R127	-1.1	5.1 × 10⁻⁵	1.8 × 10⁻³
EPHB6	2051	J3KQU5	-1.1	2.1 × 10⁻³	3.1 × 10⁻²
RTN1	6252	Q16799	-1.1	6.3 × 10⁻⁸	8.5 × 10⁻⁶
ADORA1	134	P30542	-1.1	1.5 × 10⁻⁴	4.1 × 10⁻³
PLPP4	196051	Q5VZY2	-1.1	6.5 × 10⁻⁶	3.6 × 10⁻⁴
GAP43	2596	P17677	-1.1	4.9 × 10⁻⁴	1.1 × 10⁻²
ELFN2	114794	Q5R3F8	-1.1	6.5 × 10⁻⁴	1.3 × 10⁻²
DTX4	23220	Q9Y2E6	-1.1	9.4 × 10⁻⁴	1.7 × 10⁻²
SEPTIN4	5414	O43236	-1.1	2.1 × 10⁻³	3.1 × 10⁻²
DPYD	1806	Q12882	-1.1	4.7 × 10⁻⁵	1.7 × 10⁻³
BEGAIN	57596	Q9BUH8	-1.1	1.8 × 10⁻³	2.7 × 10⁻²
RUBCNL	80183	Q9H714	-1.1	8.3 × 10⁻⁵	2.7 × 10⁻³
PDE1B	5153	A0A024RB59	-1.0	1.3 × 10⁻⁵	6.4 × 10⁻⁴
MME	4311	P08473	-1.0	1.9 × 10⁻³	2.9 × 10⁻²
DACH2	117154	A8K3I1	-1.0	3.6 × 10⁻⁶	2.2 × 10⁻⁴
ILDR2	387597	Q71H61	-1.0	2.9 × 10⁻¹²	2.8 × 10⁻⁹
INSM1	3642	Q01101	-1.0	5.8 × 10⁻⁷	4.9 × 10⁻⁵
FAM13C	220965	A8K181	-1.0	1.2 × 10⁻³	2.0 × 10⁻²
IL1R1	3554	P14778	-1.0	3.8 × 10⁻³	4.7 × 10⁻²
NCALD	83988	B2RB70	-1.0	2.0 × 10⁻⁵	8.8 × 10⁻⁴
LYPD6B	130576	Q8NI32	-1.0	3.4 × 10⁻³	4.3 × 10⁻²
KIAA1549L	25758	Q12914	-1.0	2.2 × 10⁻⁷	2.2 × 10⁻⁵
LPL	4023	A0A1B1RVA9	-1.0	3.9 × 10⁻⁴	8.8 × 10⁻³
EDNRB	1910	P24530	-1.0	1.1 × 10⁻⁷	1.3 × 10⁻⁵
TLL1	7092	O43897	-1.0	9.7 × 10⁻⁵	3.0 × 10⁻³
ZNF385B	151126	Q569K4	-1.0	1.1 × 10⁻⁵	5.5 × 10⁻⁴
SFRP2	6423	A0A140VJU3	-1.0	1.7 × 10⁻⁷	1.9 × 10⁻⁵
LGI2	55203	Q8N0V4	-1.0	1.9 × 10⁻¹⁰	7.8 × 10⁻⁸
FRMPD3	84443	Q5JV73	-1.0	6.9 × 10⁻⁴	1.4 × 10⁻²
RORB	6096	Q58EY0	-1.0	1.0 × 10⁻⁸	2.1 × 10⁻⁶
UBE2QL1	134111	A1L167	-1.0	1.5 × 10⁻⁶	1.0 × 10⁻⁴
DDX60	55601	Q6B0F7	-1.0	2.0 × 10⁻⁴	5.2 × 10⁻³
MAOA	4128	P21397	-1.0	4.4 × 10⁻⁷	4.0 × 10⁻⁵
KIAA0040	9674	J3QR46	-1.0	6.8 × 10⁻¹⁰	2.1 × 10⁻⁷
TMEFF2	23671	Q9UIK5	-1.0	2.8 × 10⁻³	3.7 × 10⁻²
HS6ST3	266722	Q8IZP7	-1.0	1.9 × 10⁻⁸	3.3 × 10⁻⁶
TC2N	123036	Q8N9U0	-1.0	8.6 × 10⁻¹¹	4.6 × 10⁻⁸
HTR7	3363	P34969	-1.0	3.4 × 10⁻³	4.3 × 10⁻²
PPP1R16B	26051	Q96T49	-1.0	3.6 × 10⁻⁷	3.4 × 10⁻⁵
AARD	441376	B2RU19	-1.0	3.2 × 10⁻³	4.2 × 10⁻²
RAB6D	150786	Q53S08	-1.0	5.0 × 10⁻⁴	1.1 × 10⁻²
DPP4	1803	P27487	-1.0	4.2 × 10⁻⁴	9.5 × 10⁻³
EFEMP1	2202	A0A0S2Z4F1	-1.0	1.8 × 10⁻⁸	3.2 × 10⁻⁶
TRPA1	8989	O75762	-1.0	5.6 × 10⁻⁴	1.2 × 10⁻²
TSPAN11	441631	A1L157	-1.0	2.1 × 10⁻³	3.0 × 10⁻²
LRAT	9227	O95237	-1.0	2.6 × 10⁻³	3.5 × 10⁻²
PRR16	51334	Q569H4	-1.0	2.0 × 10⁻³	3.0 × 10⁻²
GALNT14	79623	Q96FL9	-1.0	1.3 × 10⁻⁸	2.5 × 10⁻⁶
CCNJL	79616	B4DZA8	-1.0	4.5 × 10⁻⁵	1.7 × 10⁻³
CHRM3	1131	A0A024R3S2	-1.0	8.2 × 10⁻⁴	1.6 × 10⁻²
SETBP1	26040	Q9Y6X0	-1.0	2.1 × 10⁻⁶	1.4 × 10⁻⁴
ARFGEF3	57221	Q5TH69	-1.0	3.9 × 10⁻¹⁴	7.3 × 10⁻¹¹
TMEM132E	124842	A0A0J9YW40	-1.0	4.1 × 10⁻¹¹	2.4 × 10⁻⁸
APLN	8862	Q9ULZ1	-1.0	9.0 × 10⁻⁵	2.8 × 10⁻³
LINC00693	645206		-0.9	2.1 × 10⁻⁵	9.1 × 10⁻⁴
SLC25A48	153328	Q6ZT89	-0.9	1.4 × 10⁻³	2.3 × 10⁻²
EGFLAM	133584	Q63HQ2	-0.9	1.9 × 10⁻⁴	5.1 × 10⁻³
RNF182	221687	A0A024QZW5	-0.9	2.6 × 10⁻⁹	6.5 × 10⁻⁷
BTNL9	153579	Q6UXG8	-0.9	5.4 × 10⁻⁷	4.7 × 10⁻⁵
GABRD	2563	A8K496	-0.9	2.9 × 10⁻³	3.8 × 10⁻²
CDH7	1005	F5H5X9	-0.9	2.2 × 10⁻⁴	5.5 × 10⁻³
C3orf80	401097	F5H4A9	-0.9	1.5 × 10⁻⁶	1.1 × 10⁻⁴
CAMK4	814	Q16566	-0.9	1.5 × 10⁻⁷	1.8 × 10⁻⁵
SNCB	6620	Q16143	-0.9	1.2 × 10⁻⁴	3.7 × 10⁻³
FBXL21P	26223	Q9UKT6	-0.9	2.7 × 10⁻⁵	1.1 × 10⁻³
CCDC68	80323	A0A024R2B9	-0.9	1.4 × 10⁻⁴	3.9 × 10⁻³
PAX7	5081	P23759	-0.9	1.1 × 10⁻³	2.0 × 10⁻²
MDGA2	161357	Q7Z553	-0.9	2.8 × 10⁻⁷	2.8 × 10⁻⁵
CRACDL	343990	Q6NV74	-0.9	2.7 × 10⁻³	3.7 × 10⁻²
CAMK2N1	55450	Q7Z7J9	-0.9	1.9 × 10⁻⁵	8.3 × 10⁻⁴
RAB27B	5874	O00194	-0.9	2.3 × 10⁻⁴	5.7 × 10⁻³
HHIP	64399	Q96QV1	-0.9	4.4 × 10⁻⁵	1.7 × 10⁻³
KCNS3	3790	Q9BQ31	-0.9	3.7 × 10⁻⁴	8.5 × 10⁻³
TMEM200C	645369	A6NKL6	-0.9	1.8 × 10⁻³	2.7 × 10⁻²
MEGF10	84466	Q96KG7	-0.9	2.3 × 10⁻³	3.2 × 10⁻²
BEX1	55859	Q9HBH7	-0.9	1.3 × 10⁻¹⁰	6.1 × 10⁻⁸
SLC4A3	6508	P48751	-0.9	2.0 × 10⁻⁴	5.2 × 10⁻³
CLMP	79827	B4E3S3	-0.9	1.6 × 10⁻⁵	7.2 × 10⁻⁴
LZTS1	11178	Q9Y250	-0.9	3.2 × 10⁻⁴	7.6 × 10⁻³
SLC24A4	123041	Q8NFF2	-0.9	1.3 × 10⁻³	2.2 × 10⁻²
SVEP1	79987	B3KQM1	-0.9	9.3 × 10⁻⁵	2.9 × 10⁻³
MMP2	4313	P08253	-0.9	1.6 × 10⁻³	2.5 × 10⁻²
SRPX	8406	P78539	-0.9	2.1 × 10⁻⁶	1.4 × 10⁻⁴
SNTB1	6641	Q13884	-0.9	8.7 × 10⁻¹¹	4.6 × 10⁻⁸
SNCAIP	9627	Q9Y6H5	-0.9	2.8 × 10⁻³	3.7 × 10⁻²
LRRN2	10446	A0A024R993	-0.9	1.2 × 10⁻⁴	3.5 × 10⁻³
FLRT2	23768	O43155	-0.9	1.4 × 10⁻⁷	1.7 × 10⁻⁵
KNDC1	85442	Q76NI1	-0.9	3.1 × 10⁻³	4.0 × 10⁻²
DPYSL3	1809	A0A140VK07	-0.9	2.4 × 10⁻¹⁸	2.7 × 10⁻¹⁴
RBM24	221662	Q9BX46	-0.9	3.1 × 10⁻³	4.0 × 10⁻²
FZD10	11211	Q6NSL8	-0.9	4.4 × 10⁻⁶	2.6 × 10⁻⁴
RASGRF2	5924	O14827	-0.9	1.8 × 10⁻⁸	3.2 × 10⁻⁶
RBFOX3	146713	A6NFN3	-0.9	3.9 × 10⁻³	4.7 × 10⁻²
NPNT	255743	Q6UXI9	-0.9	5.3 × 10⁻⁵	1.9 × 10⁻³
NKX3-1	4824	Q99801	-0.9	6.5 × 10⁻⁵	2.2 × 10⁻³
CR2	1380	P20023	-0.9	2.0 × 10⁻³	3.0 × 10⁻²
PKIB	5570	Q9C010	-0.9	7.2 × 10⁻⁷	5.7 × 10⁻⁵
ANKRD34B	340120	A5PLL1	-0.9	5.0 × 10⁻⁵	1.8 × 10⁻³
IRF8	3394	Q02556	-0.8	3.5 × 10⁻⁵	1.3 × 10⁻³
ZBTB16	7704	A0A024R3C6	-0.8	2.6 × 10⁻³	3.5 × 10⁻²
JPH3	57338	F8W9A3	-0.8	1.4 × 10⁻⁹	4.1 × 10⁻⁷
NAP1L2	4674	Q9ULW6	-0.8	1.3 × 10⁻⁴	3.8 × 10⁻³
SLC16A7	9194	A0A024RBB2	-0.8	6.6 × 10⁻⁷	5.4 × 10⁻⁵
SYPL2	284612	Q5VXT5	-0.8	3.2 × 10⁻⁷	3.1 × 10⁻⁵
FLI1	2313	A0A024R3N6	-0.8	1.3 × 10⁻⁵	6.3 × 10⁻⁴
NAV2	89797	A7E2D6	-0.8	8.3 × 10⁻⁵	2.7 × 10⁻³
TMEM108	66000	Q6UXF1	-0.8	4.7 × 10⁻⁵	1.7 × 10⁻³
NIBAN1	116496	Q9BZQ8	-0.8	3.0 × 10⁻⁸	4.6 × 10⁻⁶
TTC9	23508	A0A024R6B1	-0.8	1.4 × 10⁻⁵	6.7 × 10⁻⁴
TBC1D30	23329	Q9Y2I9	-0.8	8.3 × 10⁻⁸	1.1 × 10⁻⁵
NPTXR	23467	O95502	-0.8	2.9 × 10⁻⁴	7.0 × 10⁻³
ABCB1	5243	A4D1D2	-0.8	1.7 × 10⁻¹⁰	7.5 × 10⁻⁸
ADGRG6	57211	Q86SQ4	-0.8	7.9 × 10⁻⁷	6.2 × 10⁻⁵
CNPY1	285888	Q3B7I2	-0.8	2.7 × 10⁻⁵	1.1 × 10⁻³
UGT3A2	167127	Q3SY77	-0.8	6.2 × 10⁻⁵	2.1 × 10⁻³
TRIB2	28951	Q92519	-0.8	1.5 × 10⁻¹¹	1.2 × 10⁻⁸
GEM	2669	A0A024R9F5	-0.8	7.1 × 10⁻⁴	1.4 × 10⁻²
NXPH4	11247	O95158	-0.8	1.6 × 10⁻⁷	1.8 × 10⁻⁵
ZNF521	25925	J3KTI4	-0.8	2.6 × 10⁻⁷	2.5 × 10⁻⁵
CDYL2	124359	Q8N8U2	-0.8	2.4 × 10⁻⁵	9.9 × 10⁻⁴
LAYN	143903	Q6UX15	-0.8	3.7 × 10⁻¹⁰	1.4 × 10⁻⁷
FBLN5	10516	A0A024R6G3	-0.8	6.5 × 10⁻⁵	2.2 × 10⁻³
PHEX-AS1	100873942		-0.8	3.2 × 10⁻³	4.1 × 10⁻²
GDF6	392255	A0A0S2A5D6	-0.8	2.3 × 10⁻⁴	5.7 × 10⁻³
APBA1	320	Q02410	-0.8	1.1 × 10⁻³	1.9 × 10⁻²
SAMD12	401474	B8ZZB7	-0.8	4.5 × 10⁻⁷	4.0 × 10⁻⁵
FGF12	2257	P61328	-0.8	1.3 × 10⁻³	2.2 × 10⁻²
ARHGAP20	57569	Q9P2F6	-0.8	5.4 × 10⁻⁷	4.7 × 10⁻⁵
GNG11	2791	P61952	-0.8	6.3 × 10⁻⁴	1.3 × 10⁻²
EGFR	1956	Q504U8	-0.8	8.3 × 10⁻⁷	6.4 × 10⁻⁵
MBP	4155	P02686	-0.8	9.2 × 10⁻⁴	1.7 × 10⁻²
VSTM4	196740	Q8IW00	-0.8	8.4 × 10⁻⁵	2.7 × 10⁻³
SPATA6	54558	Q9NWH7	-0.8	8.0 × 10⁻⁵	2.6 × 10⁻³
BEND6	221336	Q5SZJ8	-0.8	1.6 × 10⁻³	2.5 × 10⁻²
KCNH2	3757	A0A090N8Q0	-0.8	1.9 × 10⁻⁴	5.1 × 10⁻³
CRIP2	1397	P52943	-0.8	2.0 × 10⁻³	2.9 × 10⁻²
FAM124A	220108	Q86V42	-0.8	3.2 × 10⁻⁴	7.6 × 10⁻³
BARX2	8538	Q9UMQ3	-0.8	2.8 × 10⁻⁸	4.5 × 10⁻⁶
STXBP5L	9515	B4DKF6	-0.8	1.2 × 10⁻⁴	3.5 × 10⁻³
GALNT3	2591	Q14435	-0.8	3.4 × 10⁻⁴	7.9 × 10⁻³
ABTB3	121551	A6QL63	-0.8	3.8 × 10⁻⁷	3.6 × 10⁻⁵
GFRA1	2674	P56159	-0.8	5.3 × 10⁻⁶	3.1 × 10⁻⁴
PDZD4	57595	Q17RL8	-0.8	2.0 × 10⁻⁶	1.4 × 10⁻⁴
S1PR1	1901	P21453	-0.8	1.8 × 10⁻⁴	5.0 × 10⁻³
NRG2	9542	F5GZS7	-0.8	2.7 × 10⁻⁵	1.1 × 10⁻³
LPAR1	1902	Q5VZX0	-0.8	2.5 × 10⁻⁷	2.5 × 10⁻⁵
ZBTB7C	201501	A1YPR0	-0.8	1.5 × 10⁻³	2.4 × 10⁻²
SLC44A3	126969	Q8N4M1	-0.8	1.4 × 10⁻³	2.2 × 10⁻²
ACADL	33	P28330	-0.8	3.2 × 10⁻⁵	1.2 × 10⁻³
PTGER2	5732	P43116	-0.8	3.7 × 10⁻³	4.6 × 10⁻²
JAKMIP1	152789	Q96N16	-0.8	6.4 × 10⁻⁵	2.2 × 10⁻³
GMPR	2766	P36959	-0.8	6.0 × 10⁻⁴	1.3 × 10⁻²
RAB3IL1	5866	Q8TBN0	-0.8	6.4 × 10⁻⁴	1.3 × 10⁻²
NEFL	4747	P07196	-0.8	7.6 × 10⁻¹⁸	4.3 × 10⁻¹⁴
MYO5B	4645	Q7Z7A5	-0.8	7.9 × 10⁻⁶	4.2 × 10⁻⁴
GPC5	2262	P78333	-0.7	3.6 × 10⁻⁴	8.3 × 10⁻³
FAT3	120114	Q8TDW7	-0.7	3.4 × 10⁻¹⁴	7.3 × 10⁻¹¹
PRKCQ	5588	Q04759	-0.7	6.5 × 10⁻⁶	3.6 × 10⁻⁴
NEURL1B	54492	A8MQ27	-0.7	8.5 × 10⁻⁵	2.7 × 10⁻³
PNMA3	29944	Q9UL41	-0.7	2.0 × 10⁻⁴	5.1 × 10⁻³
NTN4	59277	A8K3H6	-0.7	6.9 × 10⁻⁵	2.3 × 10⁻³
ACVR1C	130399	Q8NER5	-0.7	4.5 × 10⁻⁵	1.7 × 10⁻³
SYNE3	161176	Q6ZMZ3	-0.7	5.1 × 10⁻⁴	1.1 × 10⁻²
SAMD5	389432	Q5TGI4	-0.7	8.3 × 10⁻⁹	1.8 × 10⁻⁶
ACSS1	84532	Q9NUB1	-0.7	1.8 × 10⁻⁸	3.2 × 10⁻⁶
DGKA	1606	A0A024RB23	-0.7	8.0 × 10⁻⁴	1.5 × 10⁻²
PLCL1	5334	Q15111	-0.7	1.1 × 10⁻³	1.9 × 10⁻²
VDR	7421	F1D8P8	-0.7	1.9 × 10⁻⁷	2.1 × 10⁻⁵
FAM174B	400451	Q3ZCQ3	-0.7	3.1 × 10⁻³	4.0 × 10⁻²
LBH	81606	Q53QV2	-0.7	2.9 × 10⁻⁴	7.0 × 10⁻³
GASK1A	729085	Q9UFP1	-0.7	3.6 × 10⁻⁵	1.4 × 10⁻³
NHS	4810	Q6T4R5	-0.7	2.0 × 10⁻⁴	5.2 × 10⁻³
SFRP1	6422	Q8N474	-0.7	3.3 × 10⁻⁸	4.9 × 10⁻⁶
GLT8D2	83468	Q9H1C3	-0.7	1.3 × 10⁻⁴	3.7 × 10⁻³
ENTREP2	23359	O60320	-0.7	4.4 × 10⁻⁴	9.7 × 10⁻³
PGBD5	79605	Q8N414	-0.7	3.5 × 10⁻⁹	8.3 × 10⁻⁷
ESRRB	2103	O95718	-0.7	2.1 × 10⁻³	3.1 × 10⁻²
PLK2	10769	A0A087WUH9	-0.7	3.5 × 10⁻⁶	2.2 × 10⁻⁴
HECW2	57520	A0A2C9F2N4	-0.7	6.3 × 10⁻⁶	3.5 × 10⁻⁴
JAKMIP2	9832	Q96AA8	-0.7	8.1 × 10⁻⁸	1.0 × 10⁻⁵
PPARGC1A	10891	Q9UBK2	-0.7	2.7 × 10⁻⁵	1.1 × 10⁻³
SERINC2	347735	Q96IM8	-0.7	1.8 × 10⁻⁵	8.3 × 10⁻⁴
KALRN	8997	J3QSW6	-0.7	2.2 × 10⁻⁴	5.5 × 10⁻³
LYSMD2	256586	Q8IV50	-0.7	9.1 × 10⁻⁴	1.7 × 10⁻²
CHST2	9435	Q9Y4C5	-0.7	7.9 × 10⁻⁵	2.6 × 10⁻³
SOX21-AS1	100507533		-0.7	6.8 × 10⁻⁸	9.0 × 10⁻⁶
CNTFR	1271	P26992	-0.7	2.4 × 10⁻³	3.3 × 10⁻²
HLA-B	3106	E5FQ95	-0.7	5.5 × 10⁻¹⁵	1.6 × 10⁻¹¹
RNF144B	255488	Q7Z419	-0.7	9.5 × 10⁻⁵	2.9 × 10⁻³
RAB39B	116442	Q96DA2	-0.7	2.4 × 10⁻⁴	5.9 × 10⁻³
DCLK1	9201	O15075	-0.7	3.0 × 10⁻⁴	7.1 × 10⁻³
ATP1A3	478	P13637	-0.7	8.6 × 10⁻⁷	6.5 × 10⁻⁵
CDHR1	92211	F1T0L2	-0.7	1.3 × 10⁻³	2.1 × 10⁻²
FAM83B	222584	Q5T0W9	-0.7	9.9 × 10⁻⁵	3.1 × 10⁻³
ARMH4	145407	Q86TY3	-0.7	4.9 × 10⁻⁴	1.1 × 10⁻²
GUCY1A2	2977	P33402	-0.7	5.0 × 10⁻⁷	4.4 × 10⁻⁵
KLF7	8609	O75840	-0.7	6.0 × 10⁻⁶	3.4 × 10⁻⁴
BCL11B	64919	L8B8F6	-0.7	1.9 × 10⁻⁴	5.1 × 10⁻³
NPTX2	4885	P47972	-0.7	8.7 × 10⁻⁷	6.5 × 10⁻⁵
B4GALNT1	2583	Q00973	-0.7	2.4 × 10⁻⁵	1.0 × 10⁻³
KCNK1	3775	A0A024R3T2	-0.7	5.5 × 10⁻⁵	1.9 × 10⁻³
HAGLR	401022		-0.7	2.3 × 10⁻⁵	9.8 × 10⁻⁴
PRKCB	5579	P05771	-0.7	1.9 × 10⁻⁵	8.4 × 10⁻⁴
ATRNL1	26033	Q4G0Y2	-0.7	3.9 × 10⁻⁷	3.6 × 10⁻⁵
SLC16A9	220963	Q7RTY1	-0.7	1.2 × 10⁻⁸	2.3 × 10⁻⁶
AFF2	2334	P51816	-0.7	5.5 × 10⁻⁷	4.7 × 10⁻⁵
ELOVL7	79993	A1L3X0	-0.7	9.3 × 10⁻⁸	1.1 × 10⁻⁵
AFAP1L1	134265	Q8TED9	-0.7	3.8 × 10⁻⁷	3.6 × 10⁻⁵
NCAM1	4684	P13591	-0.7	9.7 × 10⁻¹¹	4.8 × 10⁻⁸
RFTN1	23180	Q14699	-0.7	3.7 × 10⁻⁴	8.5 × 10⁻³
APCDD1	147495	Q8J025	-0.7	3.5 × 10⁻³	4.4 × 10⁻²
DDIT4L	115265	Q96D03	-0.7	1.4 × 10⁻³	2.3 × 10⁻²
TMOD2	29767	Q9NZR1	-0.7	1.4 × 10⁻⁸	2.7 × 10⁻⁶
FNDC4	64838	Q9H6D8	-0.6	7.3 × 10⁻⁴	1.4 × 10⁻²
FLT1	2321	P17948	-0.6	3.7 × 10⁻⁸	5.4 × 10⁻⁶
SORBS2	8470	O94875	-0.6	1.1 × 10⁻³	1.9 × 10⁻²
TMEM158	25907	Q8WZ71	-0.6	4.8 × 10⁻⁵	1.7 × 10⁻³
TMEM255A	55026	Q5JRV8	-0.6	1.9 × 10⁻⁴	5.0 × 10⁻³
DCHS1	8642	Q96JQ0	-0.6	8.9 × 10⁻⁴	1.6 × 10⁻²
SRRM3	222183	A0A087WXA3	-0.6	2.7 × 10⁻³	3.7 × 10⁻²
SORL1	6653	A0A024R3H2	-0.6	5.9 × 10⁻¹⁰	1.9 × 10⁻⁷
CNTNAP2	26047	A0A090N7T7	-0.6	3.8 × 10⁻¹²	3.1 × 10⁻⁹
HLF	3131	Q16534	-0.6	3.0 × 10⁻⁴	7.1 × 10⁻³
PRKCH	5583	P24723	-0.6	2.2 × 10⁻⁷	2.3 × 10⁻⁵
IKZF2	22807	Q9UKS7	-0.6	2.0 × 10⁻⁴	5.2 × 10⁻³
ITGA4	3676	P13612	-0.6	8.6 × 10⁻⁸	1.1 × 10⁻⁵
CSF1	1435	A0A024R0A1	-0.6	8.9 × 10⁻⁵	2.8 × 10⁻³
NAP1L3	4675	Q8IYV1	-0.6	7.5 × 10⁻⁹	1.7 × 10⁻⁶
GPR37	2861	O15354	-0.6	8.1 × 10⁻⁵	2.6 × 10⁻³
C3orf70	285382	A6NLC5	-0.6	1.6 × 10⁻⁴	4.5 × 10⁻³
BOC	91653	Q9BWV1	-0.6	1.6 × 10⁻⁵	7.2 × 10⁻⁴
WNT11	7481	O96014	-0.6	1.4 × 10⁻⁴	3.8 × 10⁻³
ESRRG	2104	F1D8R6	-0.6	6.5 × 10⁻⁷	5.4 × 10⁻⁵
DLL1	28514	O00548	-0.6	9.3 × 10⁻⁴	1.7 × 10⁻²
TMEM54	113452	Q969K7	-0.6	3.6 × 10⁻⁵	1.4 × 10⁻³
VANGL2	57216	A8K4L6	-0.6	1.7 × 10⁻⁹	4.8 × 10⁻⁷
EMX1	2016	Q04741	-0.6	9.2 × 10⁻⁴	1.7 × 10⁻²
EPHA8	2046	P29322	-0.6	3.4 × 10⁻⁶	2.1 × 10⁻⁴
TMEM74B	55321	Q9NUR3	-0.6	2.7 × 10⁻³	3.7 × 10⁻²
KCTD12	115207	A0A140VJM4	-0.6	1.1 × 10⁻¹⁶	4.2 × 10⁻¹³
IGFBP2	3485	P18065	-0.6	2.4 × 10⁻⁹	6.4 × 10⁻⁷
COLGALT2	23127	B4DF84	-0.6	6.3 × 10⁻⁵	2.2 × 10⁻³
TRIM58	25893	Q8NG06	-0.6	5.6 × 10⁻⁵	2.0 × 10⁻³
LDLRAD4	753	O15165	-0.6	7.9 × 10⁻⁵	2.6 × 10⁻³
ASPHD2	57168	A0A024R1D0	-0.6	6.8 × 10⁻⁷	5.5 × 10⁻⁵
PRKCQ-AS1	439949		-0.6	3.7 × 10⁻⁵	1.4 × 10⁻³
SOX21	11166	Q9Y651	-0.6	8.4 × 10⁻⁷	6.4 × 10⁻⁵
SCARA3	51435	Q6AZY7	-0.6	7.5 × 10⁻⁴	1.5 × 10⁻²
COL5A1	1289	A0A024R8E5	-0.6	6.6 × 10⁻⁴	1.3 × 10⁻²
EML6	400954	Q6ZMW3	-0.6	1.9 × 10⁻⁵	8.5 × 10⁻⁴
CUX2	23316	O14529	-0.6	7.5 × 10⁻⁵	2.5 × 10⁻³
SYNDIG1	79953	Q9H7V2	-0.6	1.8 × 10⁻³	2.7 × 10⁻²
C2orf72	257407	A6NCS6	-0.6	5.9 × 10⁻⁴	1.2 × 10⁻²
TWIST2	117581	A0A024R4D4	-0.6	1.5 × 10⁻⁴	4.3 × 10⁻³
ENC1	8507	O14682	-0.6	9.2 × 10⁻⁶	4.8 × 10⁻⁴
HTRA1	5654	Q92743	-0.6	3.9 × 10⁻⁵	1.5 × 10⁻³
PARM1	25849	Q6UWI2	-0.6	6.1 × 10⁻⁵	2.1 × 10⁻³
DDAH1	23576	B4E3V1	-0.6	1.2 × 10⁻¹²	1.3 × 10⁻⁹
EYA2	2139	O00167	-0.6	2.2 × 10⁻⁵	9.3 × 10⁻⁴
EPAS1	2034	B3KW07	-0.6	3.4 × 10⁻⁹	8.3 × 10⁻⁷
TAP1	6890	A0A0S2Z5A6	-0.6	2.2 × 10⁻⁶	1.4 × 10⁻⁴
GNG2	54331	P59768	-0.6	2.0 × 10⁻³	3.0 × 10⁻²
HPGD	3248	P15428	-0.6	2.2 × 10⁻³	3.2 × 10⁻²
SH3GL2	6456	Q7Z376	-0.6	5.0 × 10⁻⁴	1.1 × 10⁻²
ARHGAP31	57514	Q2M1Z3	-0.6	4.5 × 10⁻⁴	9.9 × 10⁻³
SLC1A1	6505	P43005	-0.6	3.0 × 10⁻⁵	1.2 × 10⁻³
TSHZ3	57616	Q63HK5	-0.6	1.7 × 10⁻⁵	7.7 × 10⁻⁴
SHISAL1	85352	Q3SXP7	-0.6	4.0 × 10⁻⁶	2.4 × 10⁻⁴
NRIP3	56675	Q9NQ35	-0.6	2.2 × 10⁻⁹	6.1 × 10⁻⁷
ST8SIA4	7903	Q92187	-0.6	5.0 × 10⁻⁴	1.1 × 10⁻²
FXYD6	53826	A0A024R3J8	-0.6	6.8 × 10⁻⁴	1.4 × 10⁻²
SERTAD4	56256	Q9NUC0	-0.6	7.0 × 10⁻⁷	5.7 × 10⁻⁵
ATL1	51062	A0A0S2Z5A2	-0.6	4.1 × 10⁻⁴	9.2 × 10⁻³
GHR	2690	P10912	-0.6	4.9 × 10⁻⁵	1.8 × 10⁻³
DNM3	26052	Q9UQ16	-0.6	6.4 × 10⁻⁴	1.3 × 10⁻²
NMU	10874	A0A0B4J202	-0.6	7.9 × 10⁻⁵	2.6 × 10⁻³
CDO1	1036	Q16878	-0.6	7.2 × 10⁻⁵	2.4 × 10⁻³
SEPTIN3	55964	Q9UH03	-0.6	6.3 × 10⁻⁶	3.5 × 10⁻⁴
PLXNA2	5362	O75051	-0.6	4.8 × 10⁻⁵	1.7 × 10⁻³
MBNL3	55796	Q9NUK0	-0.6	1.2 × 10⁻¹²	1.3 × 10⁻⁹
GDF7	151449	Q75RY1	-0.6	2.4 × 10⁻³	3.3 × 10⁻²
RPS6KA2	6196	Q15349	-0.6	5.9 × 10⁻⁷	4.9 × 10⁻⁵
PDZRN3	23024	Q9UPQ7	-0.6	1.1 × 10⁻⁷	1.3 × 10⁻⁵
NEFM	4741	Q9UK51	-0.5	1.3 × 10⁻³	2.2 × 10⁻²
EDNRA	1909	P25101	-0.5	2.2 × 10⁻⁴	5.5 × 10⁻³
SYT3	84258	A0A024R4I9	-0.5	3.9 × 10⁻³	4.8 × 10⁻²
VGLL3	389136	A8MV65	-0.5	1.0 × 10⁻⁴	3.2 × 10⁻³
DPYSL4	10570	O14531	-0.5	1.1 × 10⁻³	1.9 × 10⁻²
TMEM121	80757	Q9BTD3	-0.5	1.3 × 10⁻⁴	3.8 × 10⁻³
PTPRD	5789	Q59H90	-0.5	1.6 × 10⁻⁷	1.8 × 10⁻⁵
SHISA2	387914	Q6UWI4	-0.5	2.4 × 10⁻⁸	3.9 × 10⁻⁶
PRRT4	401399	C9JH25	-0.5	1.4 × 10⁻³	2.3 × 10⁻²
SCN5A	6331	Q14524	-0.5	7.2 × 10⁻⁵	2.4 × 10⁻³
LEPR	3953	P48357	-0.5	1.8 × 10⁻⁷	2.0 × 10⁻⁵
LRRC4B	94030	A0A024R4I8	-0.5	1.4 × 10⁻³	2.3 × 10⁻²
FENDRR	400550		-0.5	3.3 × 10⁻³	4.2 × 10⁻²
PNMA6A	84968	P0CW24	-0.5	5.6 × 10⁻⁶	3.2 × 10⁻⁴
BACH2	60468	Q9BYV9	-0.5	2.3 × 10⁻⁴	5.7 × 10⁻³
HMCN1	83872	Q96RW7	-0.5	1.2 × 10⁻³	2.1 × 10⁻²
QRFPR	84109	Q96P65	-0.5	1.0 × 10⁻⁴	3.2 × 10⁻³
C14orf132	56967	Q9NPU4	-0.5	4.1 × 10⁻⁸	5.9 × 10⁻⁶
ARHGEF6	9459	B7Z3C7	-0.5	4.4 × 10⁻⁵	1.6 × 10⁻³
SLC16A14	151473	Q7RTX9	-0.5	1.3 × 10⁻⁴	3.7 × 10⁻³
RGS17	26575	Q9UGC6	-0.5	3.6 × 10⁻³	4.4 × 10⁻²
SLC35F1	222553	Q5T1Q4	-0.5	1.7 × 10⁻¹⁰	7.5 × 10⁻⁸
GPAT3	84803	A0A024RDG5	-0.5	1.4 × 10⁻⁴	3.9 × 10⁻³
SOX5	6660	P35711	-0.5	1.2 × 10⁻³	2.1 × 10⁻²
PWWP3B	139221	Q5H9M0	-0.5	1.2 × 10⁻⁵	5.8 × 10⁻⁴
FGF13	2258	Q92913	-0.5	3.2 × 10⁻⁶	2.0 × 10⁻⁴
KIF21B	23046	O75037	-0.5	1.5 × 10⁻⁴	4.1 × 10⁻³
NID2	22795	Q14112	-0.5	4.5 × 10⁻⁸	6.3 × 10⁻⁶
ZNF536	9745	O15090	-0.5	5.1 × 10⁻⁴	1.1 × 10⁻²
ELMOD1	55531	Q8N336	-0.5	1.0 × 10⁻³	1.9 × 10⁻²
LONRF2	164832	Q1L5Z9	-0.5	8.2 × 10⁻⁹	1.8 × 10⁻⁶
S1PR3	1903	Q99500	-0.5	1.0 × 10⁻³	1.8 × 10⁻²
DNAH1	25981	A0A140VJI6	-0.5	4.2 × 10⁻⁴	9.4 × 10⁻³
PXDN	7837	Q92626	-0.5	6.5 × 10⁻¹⁰	2.1 × 10⁻⁷
DUSP5	1847	Q16690	-0.5	1.9 × 10⁻³	2.9 × 10⁻²
MEIS3	56917	A0A024R0S2	-0.5	2.9 × 10⁻⁴	7.1 × 10⁻³
MFSD6	54842	Q6ZSS7	-0.5	3.6 × 10⁻³	4.5 × 10⁻²
CPM	1368	P14384	-0.5	3.6 × 10⁻³	4.5 × 10⁻²
SERPINE2	5270	A0A024R498	-0.5	4.0 × 10⁻⁶	2.4 × 10⁻⁴
PPFIA4	8497	B4DIS5	-0.5	2.2 × 10⁻³	3.2 × 10⁻²
ADAMTS2	9509	O95450	-0.5	6.2 × 10⁻⁴	1.3 × 10⁻²
SH2D4A	63898	Q9H788	-0.5	8.4 × 10⁻⁴	1.6 × 10⁻²
RAB9B	51209	Q9NP90	-0.5	6.5 × 10⁻⁴	1.3 × 10⁻²
PMEPA1	56937	Q969W9	-0.5	1.5 × 10⁻³	2.4 × 10⁻²
TMEM74	157753	A0A024R9D4	-0.5	2.1 × 10⁻³	3.1 × 10⁻²
WDR72	256764	A0A087WTC3	-0.5	8.5 × 10⁻⁵	2.7 × 10⁻³
F12	2161	P00748	-0.5	1.7 × 10⁻³	2.7 × 10⁻²
EIF4E3	317649	Q8N5X7	-0.5	2.9 × 10⁻⁵	1.1 × 10⁻³
RIMKLA	284716	Q8IXN7	-0.5	2.0 × 10⁻⁴	5.2 × 10⁻³
DAB2	1601	P98082	-0.5	1.8 × 10⁻⁴	5.0 × 10⁻³
MFAP3L	9848	O75121	-0.5	2.3 × 10⁻⁶	1.5 × 10⁻⁴
ADCY1	107	C9J1J0	-0.5	3.1 × 10⁻⁸	4.7 × 10⁻⁶
DGAT2	84649	Q96PD7	-0.5	1.1 × 10⁻⁵	5.3 × 10⁻⁴
XYLT1	64131	Q86Y38	-0.5	3.8 × 10⁻⁴	8.6 × 10⁻³
NRCAM	4897	Q14CA1	-0.5	1.5 × 10⁻⁵	7.0 × 10⁻⁴
SLC4A4	8671	A0A024RD97	-0.5	2.3 × 10⁻⁴	5.7 × 10⁻³
PAQR5	54852	A0A024R607	-0.5	1.8 × 10⁻⁵	8.3 × 10⁻⁴
GPC4	2239	O75487	-0.5	1.5 × 10⁻⁶	1.1 × 10⁻⁴
DOK6	220164	Q6PKX4	-0.5	2.4 × 10⁻³	3.4 × 10⁻²
CAMK1D	57118	Q5SQQ7	-0.5	1.1 × 10⁻⁴	3.3 × 10⁻³
EPOP	100170841	A6NHQ4	-0.5	2.3 × 10⁻⁸	3.8 × 10⁻⁶
PPP4R4	57718	Q6NUP7	-0.5	3.2 × 10⁻⁴	7.5 × 10⁻³
B4GALNT4	338707	Q76KP1	-0.5	2.3 × 10⁻⁴	5.7 × 10⁻³
TMTC1	83857	Q8IUR5	-0.5	1.1 × 10⁻⁵	5.7 × 10⁻⁴
SMIM10L2B	399668	P0DMW4	-0.5	2.1 × 10⁻³	3.1 × 10⁻²
ZCCHC12	170261	Q6PEW1	-0.5	2.0 × 10⁻⁷	2.1 × 10⁻⁵
BASP1	10409	P80723	-0.5	8.9 × 10⁻⁶	4.7 × 10⁻⁴
PGAP4	84302	A0A024R188	-0.5	2.1 × 10⁻⁷	2.2 × 10⁻⁵
EFNB3	1949	Q15768	-0.5	1.6 × 10⁻³	2.5 × 10⁻²
BATF3	55509	Q9NR55	-0.5	2.7 × 10⁻³	3.6 × 10⁻²
ROR1	4919	Q01973	-0.5	5.4 × 10⁻⁵	1.9 × 10⁻³
VAV3	10451	Q9UKW4	-0.5	5.9 × 10⁻⁴	1.2 × 10⁻²
LINC00963	100506190		-0.5	3.3 × 10⁻³	4.2 × 10⁻²
EPHB2	2048	B4DSE0	-0.5	7.8 × 10⁻⁶	4.1 × 10⁻⁴
TMEM178B	100507421	H3BS89	-0.5	1.4 × 10⁻⁵	6.8 × 10⁻⁴
CYP1B1	1545	Q16678	-0.5	3.9 × 10⁻³	4.7 × 10⁻²
DTX3L	151636	Q8TDB6	-0.5	2.2 × 10⁻³	3.2 × 10⁻²
THRB	7068	F1D8N7	-0.5	2.2 × 10⁻⁶	1.5 × 10⁻⁴
FNDC10	643988	F2Z333	-0.5	8.5 × 10⁻⁵	2.7 × 10⁻³
PLCE1	51196	Q9P212	-0.4	1.2 × 10⁻⁴	3.4 × 10⁻³
COLEC12	81035	Q5KU26	-0.4	8.2 × 10⁻⁷	6.4 × 10⁻⁵
OTULINL	54491	Q9NUU6	-0.4	6.5 × 10⁻⁶	3.6 × 10⁻⁴
SLC46A3	283537	Q7Z3Q1	-0.4	2.5 × 10⁻³	3.4 × 10⁻²
IL4R	3566	P24394	-0.4	8.2 × 10⁻⁴	1.6 × 10⁻²
KIF5C	3800	O60282	-0.4	1.1 × 10⁻³	1.9 × 10⁻²
EMILIN3	90187	Q9NT22	-0.4	5.7 × 10⁻⁸	7.9 × 10⁻⁶
DAAM2	23500	Q86T65	-0.4	2.1 × 10⁻⁵	9.1 × 10⁻⁴
SPTB	6710	P11277	-0.4	2.3 × 10⁻⁵	9.8 × 10⁻⁴
IRS2	8660	Q9P084	-0.4	1.1 × 10⁻³	1.9 × 10⁻²
ANKRD33B	651746	A6NCL7	-0.4	3.3 × 10⁻⁵	1.3 × 10⁻³
FBXO41	150726	Q8TF61	-0.4	1.4 × 10⁻³	2.3 × 10⁻²
PPP1R14C	81706	Q8TAE6	-0.4	3.0 × 10⁻⁸	4.6 × 10⁻⁶
HMOX1	3162	P09601	-0.4	2.6 × 10⁻⁶	1.7 × 10⁻⁴
DPYSL2	1808	A0A1C7CYX9	-0.4	9.3 × 10⁻⁹	1.9 × 10⁻⁶
EPDR1	54749	Q96J80	-0.4	7.9 × 10⁻⁴	1.5 × 10⁻²
GPM6B	2824	Q13491	-0.4	7.4 × 10⁻⁷	5.8 × 10⁻⁵
IKZF3	22806	Q9UKT9	-0.4	5.5 × 10⁻⁴	1.2 × 10⁻²
TSPAN18	90139	Q96SJ8	-0.4	3.9 × 10⁻³	4.7 × 10⁻²
WSCD1	23302	Q658N2	-0.4	1.2 × 10⁻⁶	9.0 × 10⁻⁵
OLIG2	10215	Q13516	-0.4	2.1 × 10⁻³	3.1 × 10⁻²
PDE4D	5144	A0A140VJR0	-0.4	2.4 × 10⁻⁵	9.9 × 10⁻⁴
RAPGEF4	11069	Q8WZA2	-0.4	1.0 × 10⁻³	1.8 × 10⁻²
NR3C2	4306	B0ZBF6	-0.4	7.5 × 10⁻⁶	4.0 × 10⁻⁴
PTPRU	10076	Q92729	-0.4	8.8 × 10⁻⁹	1.9 × 10⁻⁶
ANKRD44	91526	Q8N8A2	-0.4	2.7 × 10⁻³	3.6 × 10⁻²
GALNT18	374378	Q58A54	-0.4	1.8 × 10⁻⁵	8.0 × 10⁻⁴
GCA	25801	H7BXD5	-0.4	2.7 × 10⁻⁵	1.1 × 10⁻³
SMCO4	56935	A0A024R3A3	-0.4	2.5 × 10⁻³	3.4 × 10⁻²
NALF2	27112	O75949	-0.4	1.0 × 10⁻⁵	5.1 × 10⁻⁴
SNPH	9751	O15079	-0.4	2.6 × 10⁻³	3.6 × 10⁻²
SPTBN2	6712	O15020	-0.4	4.8 × 10⁻¹⁰	1.7 × 10⁻⁷
SLC25A29	123096	Q8N8R3	-0.4	1.1 × 10⁻³	1.9 × 10⁻²
MYOM2	9172	P54296	-0.4	2.3 × 10⁻³	3.2 × 10⁻²
CDR1	1038	P51861	-0.4	1.2 × 10⁻⁴	3.4 × 10⁻³
ZNF853	54753	P0CG23	-0.4	2.2 × 10⁻³	3.2 × 10⁻²
GJA3	2700	Q9Y6H8	-0.4	1.1 × 10⁻³	1.9 × 10⁻²
NKD2	85409	Q969F2	-0.4	4.5 × 10⁻⁴	9.9 × 10⁻³
DACT1	51339	Q9NYF0	-0.4	1.3 × 10⁻⁴	3.7 × 10⁻³
ZDHHC22	283576	Q8N966	-0.4	1.9 × 10⁻⁵	8.4 × 10⁻⁴
ENDOD1	23052	O94919	-0.4	1.0 × 10⁻⁶	7.4 × 10⁻⁵
PAQR8	85315	B3KXW6	-0.4	7.6 × 10⁻⁴	1.5 × 10⁻²
FHOD3	80206	Q2V2M9	-0.4	1.4 × 10⁻⁵	6.8 × 10⁻⁴
KAZN	23254	Q674X7	-0.4	1.1 × 10⁻⁴	3.2 × 10⁻³
STEAP1	26872	Q9UHE8	-0.4	1.5 × 10⁻³	2.4 × 10⁻²
FRMD4A	55691	Q9NW91	-0.4	1.2 × 10⁻³	2.0 × 10⁻²
IGFBPL1	347252	Q8WX77	-0.4	2.1 × 10⁻⁴	5.3 × 10⁻³
REEP1	65055	E7EUF7	-0.4	4.2 × 10⁻⁴	9.4 × 10⁻³
GPC1	2817	P35052	-0.4	4.5 × 10⁻⁵	1.7 × 10⁻³
BEND4	389206	Q6ZU67	-0.4	5.8 × 10⁻⁸	8.0 × 10⁻⁶
PRRG4	79056	A0A0S2Z5N9	-0.4	6.8 × 10⁻⁴	1.4 × 10⁻²
CHST15	51363	Q7LFX5	-0.4	4.4 × 10⁻⁵	1.7 × 10⁻³
PCGF5	84333	Q86SE9	-0.4	3.0 × 10⁻⁸	4.6 × 10⁻⁶
ITGA2	3673	P17301	-0.4	4.4 × 10⁻⁴	9.7 × 10⁻³
MKX	283078	Q8IYA7	-0.4	3.2 × 10⁻⁴	7.6 × 10⁻³
ADRA2C	152	P18825	-0.4	6.2 × 10⁻⁶	3.5 × 10⁻⁴
SLC25A24	29957	Q6NUK1	-0.4	1.7 × 10⁻⁸	3.2 × 10⁻⁶
NKD1	85407	Q969G9	-0.4	1.1 × 10⁻³	1.9 × 10⁻²
SCD5	79966	Q86SK9	-0.4	9.6 × 10⁻⁶	5.0 × 10⁻⁴
MAP1B	4131	A2BDK6	-0.4	2.9 × 10⁻⁸	4.6 × 10⁻⁶
STXBP6	29091	Q8NFX7	-0.4	3.0 × 10⁻³	3.9 × 10⁻²
MID2	11043	Q9UJV3	-0.4	4.6 × 10⁻⁷	4.1 × 10⁻⁵
RHBDL3	162494	P58872	-0.4	3.3 × 10⁻³	4.2 × 10⁻²
ALDH1A2	8854	O94788	-0.4	3.0 × 10⁻⁷	2.9 × 10⁻⁵
CLGN	1047	A0A140VKG2	-0.4	2.4 × 10⁻⁵	9.9 × 10⁻⁴
CTTNBP2	83992	Q20BG9	-0.4	3.3 × 10⁻³	4.2 × 10⁻²
NOG	9241	Q13253	-0.4	9.9 × 10⁻⁴	1.8 × 10⁻²
KCNG1	3755	Q86Y85	-0.4	9.1 × 10⁻⁵	2.8 × 10⁻³
PRXL2B	127281	Q8TBF2	-0.4	1.1 × 10⁻³	1.9 × 10⁻²
ITPR3	3710	A6H8K3	-0.4	2.6 × 10⁻⁵	1.1 × 10⁻³
WIPF1	7456	A0A140VJZ9	-0.4	9.4 × 10⁻⁴	1.7 × 10⁻²
ARL4C	10123	P56559	-0.4	9.9 × 10⁻⁶	5.1 × 10⁻⁴
CCDC3	83643	Q9BQI4	-0.4	1.3 × 10⁻⁴	3.7 × 10⁻³
PRELID2	153768	Q8N945	-0.4	2.7 × 10⁻⁴	6.6 × 10⁻³
BMP6	654	B4DUF7	-0.4	2.5 × 10⁻³	3.4 × 10⁻²
DNAJC6	9829	O75061	-0.4	1.7 × 10⁻⁵	8.0 × 10⁻⁴
SLC8A1	6546	P32418	-0.4	3.5 × 10⁻⁴	8.1 × 10⁻³
COL4A1	1282	A5PKV2	-0.4	1.4 × 10⁻⁵	6.6 × 10⁻⁴
GPR176	11245	Q14439	-0.4	1.9 × 10⁻⁴	5.1 × 10⁻³
TIMP3	7078	P35625	-0.4	2.2 × 10⁻⁵	9.5 × 10⁻⁴
SH3BGRL2	83699	Q9UJC5	-0.4	4.4 × 10⁻⁶	2.6 × 10⁻⁴
NECTIN1	5818	Q15223	-0.4	3.7 × 10⁻⁴	8.5 × 10⁻³
JAG1	182	P78504	-0.3	3.2 × 10⁻³	4.1 × 10⁻²
LONRF3	79836	A8K2D3	-0.3	1.4 × 10⁻⁴	4.0 × 10⁻³
NDRG2	57447	Q9UN36	-0.3	3.1 × 10⁻⁴	7.4 × 10⁻³
CAVIN1	284119	Q6NZI2	-0.3	1.7 × 10⁻³	2.6 × 10⁻²
MMD	23531	Q15546	-0.3	8.2 × 10⁻⁴	1.6 × 10⁻²
RAB32	10981	Q13637	-0.3	4.3 × 10⁻⁵	1.6 × 10⁻³
COL27A1	85301	Q8IZC6	-0.3	1.0 × 10⁻³	1.8 × 10⁻²
SHROOM3	57619	B3KY47	-0.3	1.1 × 10⁻³	1.9 × 10⁻²
SLC27A2	11001	O14975	-0.3	2.9 × 10⁻³	3.8 × 10⁻²
ST6GALNAC3	256435	Q8NDV1	-0.3	6.3 × 10⁻⁴	1.3 × 10⁻²
AHNAK	79026	Q09666	-0.3	1.4 × 10⁻⁷	1.6 × 10⁻⁵
CAV2	858	P51636	-0.3	3.7 × 10⁻⁴	8.5 × 10⁻³
ADAM23	8745	A0A024R3W8	-0.3	3.5 × 10⁻⁴	8.1 × 10⁻³
CCDC181	57821	B2R917	-0.3	7.8 × 10⁻⁴	1.5 × 10⁻²
SYK	6850	A0A024R273	-0.3	3.3 × 10⁻⁵	1.3 × 10⁻³
RASSF5	83593	A8K5F3	-0.3	6.9 × 10⁻⁴	1.4 × 10⁻²
FN1	2335	B7ZLE5	-0.3	5.4 × 10⁻⁴	1.1 × 10⁻²
NFE2L3	9603	Q9Y4A8	-0.3	3.1 × 10⁻⁶	2.0 × 10⁻⁴
MOB3B	79817	Q86TA1	-0.3	2.3 × 10⁻³	3.2 × 10⁻²
TPBG	7162	Q13641	-0.3	2.8 × 10⁻⁴	6.7 × 10⁻³
CDC42EP3	10602	Q9UKI2	-0.3	2.3 × 10⁻³	3.2 × 10⁻²
CELF2	10659	O95319	-0.3	1.6 × 10⁻⁵	7.5 × 10⁻⁴
TWIST1	7291	Q15672	-0.3	1.6 × 10⁻³	2.6 × 10⁻²
KIT	3815	A0A024RDA0	-0.3	1.8 × 10⁻⁴	4.8 × 10⁻³
TLN2	83660	Q9Y4G6	-0.3	9.8 × 10⁻⁴	1.8 × 10⁻²
RCAN3	11123	A0A024RAH2	-0.3	1.9 × 10⁻⁴	5.1 × 10⁻³
CA12	771	O43570	-0.3	2.6 × 10⁻³	3.5 × 10⁻²
TUBB2B	347733	Q9BVA1	-0.3	4.7 × 10⁻⁶	2.8 × 10⁻⁴
RHOU	58480	A0A024R3Q7	-0.3	1.3 × 10⁻⁴	3.7 × 10⁻³
GALNT10	55568	Q86SR1	-0.3	5.9 × 10⁻⁵	2.1 × 10⁻³
MGAT3	4248	Q09327	-0.3	3.0 × 10⁻³	3.9 × 10⁻²
RIMS4	140730	Q9H426	-0.3	2.9 × 10⁻⁶	1.9 × 10⁻⁴
KLHL29	114818	Q96CT2	-0.3	7.9 × 10⁻⁴	1.5 × 10⁻²
LRRCC1	85444	B4DTJ0	-0.3	1.3 × 10⁻³	2.2 × 10⁻²
ARHGAP29	9411	Q52LW3	-0.3	1.8 × 10⁻⁵	8.3 × 10⁻⁴
EEIG2	284611	Q5T8I3	-0.3	2.2 × 10⁻⁶	1.4 × 10⁻⁴
DMD	1756	P11532	-0.3	2.9 × 10⁻⁴	7.1 × 10⁻³
SEL1L3	23231	Q68CR1	-0.3	8.5 × 10⁻⁴	1.6 × 10⁻²
PAG1	55824	Q9NWQ8	-0.3	7.8 × 10⁻⁶	4.1 × 10⁻⁴
DSC3	1825	Q14574	-0.3	4.5 × 10⁻⁷	4.0 × 10⁻⁵
COL4A2	1284	A0A024RDW8	-0.3	4.4 × 10⁻⁶	2.6 × 10⁻⁴
TSPAN5	10098	P62079	-0.3	2.3 × 10⁻⁴	5.7 × 10⁻³
KIF1A	547	Q12756	-0.3	1.2 × 10⁻⁵	5.9 × 10⁻⁴
PODXL	5420	O00592	-0.3	4.7 × 10⁻⁴	1.0 × 10⁻²
NUAK1	9891	A0A024RBL3	-0.3	7.8 × 10⁻⁴	1.5 × 10⁻²
CA8	767	P35219	-0.3	1.2 × 10⁻³	2.0 × 10⁻²
TNFRSF21	27242	A0A024RD71	-0.3	2.5 × 10⁻⁴	6.2 × 10⁻³
PTPN3	5774	B7Z9V1	-0.3	2.5 × 10⁻⁴	6.2 × 10⁻³
MCC	4163	P23508	-0.3	6.3 × 10⁻⁶	3.5 × 10⁻⁴
TRO	7216	Q12816	-0.3	6.9 × 10⁻⁶	3.8 × 10⁻⁴
ATP1B1	481	A3KLL5	-0.3	4.1 × 10⁻⁴	9.2 × 10⁻³
HIVEP2	3097	P31629	-0.3	5.3 × 10⁻⁴	1.1 × 10⁻²
PHLDB2	90102	Q86SQ0	-0.3	9.6 × 10⁻⁴	1.7 × 10⁻²
CCDC71L	168455	Q8N9Z2	-0.3	1.0 × 10⁻³	1.8 × 10⁻²
BACE2	25825	Q9Y5Z0	-0.3	9.8 × 10⁻⁵	3.0 × 10⁻³
SNAI2	6591	O43623	-0.3	1.8 × 10⁻³	2.8 × 10⁻²
OAF	220323	Q86UD1	-0.3	1.3 × 10⁻⁴	3.7 × 10⁻³
PLA2G4A	5321	B4DZI4	-0.3	2.0 × 10⁻⁴	5.2 × 10⁻³
UCHL1	7345	P09936	-0.3	1.6 × 10⁻⁷	1.8 × 10⁻⁵
NELL2	4753	B7Z625	-0.3	1.9 × 10⁻³	2.9 × 10⁻²
MAP7	9053	Q14244	-0.3	1.6 × 10⁻⁴	4.5 × 10⁻³
MDFIC	29969	Q9P1T7	-0.3	1.8 × 10⁻⁴	4.9 × 10⁻³
LINC02381	400043		-0.3	6.6 × 10⁻⁴	1.3 × 10⁻²
FAM171B	165215	Q6P995	-0.3	3.6 × 10⁻⁴	8.3 × 10⁻³
HLA-C	3107	O19617	-0.3	5.7 × 10⁻⁶	3.3 × 10⁻⁴
HTATIP2	10553	Q9BUP3	-0.3	2.2 × 10⁻³	3.2 × 10⁻²
PRKG1	5592	Q13976	-0.3	4.1 × 10⁻³	4.9 × 10⁻²
SH3RF3	344558	Q8TEJ3	-0.3	4.2 × 10⁻³	5.0 × 10⁻²
NRP2	8828	O60462	-0.3	1.8 × 10⁻³	2.7 × 10⁻²
MOXD1	26002	Q6UVY6	-0.3	1.6 × 10⁻³	2.5 × 10⁻²
HOOK1	51361	Q9UJC3	-0.3	7.1 × 10⁻⁵	2.4 × 10⁻³
BEX2	84707	Q9BXY8	-0.3	1.2 × 10⁻³	2.0 × 10⁻²
KIF26A	26153	Q9ULI4	-0.3	1.5 × 10⁻⁵	7.2 × 10⁻⁴
LEF1	51176	Q659G9	-0.3	4.9 × 10⁻⁴	1.1 × 10⁻²
GAL	51083	P22466	-0.3	2.1 × 10⁻⁴	5.4 × 10⁻³
ARRDC1-AS1	85026		-0.3	4.2 × 10⁻³	5.0 × 10⁻²
SULF2	55959	Q8IWU5	-0.3	5.3 × 10⁻⁵	1.9 × 10⁻³
IFFO2	126917	Q5TF58	-0.2	1.2 × 10⁻³	2.0 × 10⁻²
ADD2	119	P35612	-0.2	2.8 × 10⁻⁴	6.7 × 10⁻³
STX3	6809	Q13277	-0.2	1.1 × 10⁻³	1.9 × 10⁻²
ZEB2	9839	O60315	-0.2	7.9 × 10⁻⁴	1.5 × 10⁻²
ZNF462	58499	Q63HJ5	-0.2	2.2 × 10⁻³	3.1 × 10⁻²
CD9	928	A6NNI4	-0.2	2.6 × 10⁻³	3.5 × 10⁻²
HERC5	51191	B4DXV3	-0.2	1.7 × 10⁻³	2.6 × 10⁻²
STON2	85439	Q8WXE9	-0.2	2.0 × 10⁻⁴	5.2 × 10⁻³
DSC2	1824	Q02487	-0.2	2.3 × 10⁻⁴	5.8 × 10⁻³
ITGA6	3655	P23229	-0.2	9.9 × 10⁻⁴	1.8 × 10⁻²
FLT4	2324	P35916	-0.2	5.9 × 10⁻⁵	2.0 × 10⁻³
FJX1	24147	Q86VR8	-0.2	2.1 × 10⁻⁴	5.3 × 10⁻³
NCR3LG1	374383	Q68D85	-0.2	8.0 × 10⁻⁴	1.5 × 10⁻²
FOXD1	2297	Q16676	-0.2	3.2 × 10⁻⁴	7.6 × 10⁻³
SATB1	6304	A0A024R2H1	-0.2	1.9 × 10⁻³	2.8 × 10⁻²
PELI2	57161	Q9H716	-0.2	6.5 × 10⁻⁴	1.3 × 10⁻²
GPR161	23432	Q8N6U8	-0.2	1.7 × 10⁻³	2.6 × 10⁻²
AKT3	10000	Q9Y243	-0.2	6.4 × 10⁻⁵	2.2 × 10⁻³
ANKH	56172	Q9HCJ1	-0.2	1.6 × 10⁻³	2.5 × 10⁻²
LRRC8C	84230	Q8TDW0	-0.2	5.8 × 10⁻⁴	1.2 × 10⁻²
EPS8	2059	B4E3T6	-0.2	2.3 × 10⁻³	3.2 × 10⁻²
ALX4	60529	Q9H161	-0.2	4.2 × 10⁻³	5.0 × 10⁻²
KHDRBS3	10656	O75525	-0.2	2.6 × 10⁻³	3.5 × 10⁻²
SVIP	258010	Q8NHG7	-0.2	4.0 × 10⁻³	4.8 × 10⁻²
COL25A1	84570	A8MWQ5	-0.2	3.4 × 10⁻³	4.3 × 10⁻²
CD55	1604	P08174	-0.2	9.0 × 10⁻⁴	1.7 × 10⁻²
TAP2	6891	Q03519	-0.2	3.4 × 10⁻⁴	8.0 × 10⁻³
PNMA2	10687	Q5U5Z3	-0.2	3.7 × 10⁻³	4.6 × 10⁻²
EXOSC5	56915	Q9NQT4	-0.2	3.7 × 10⁻³	4.6 × 10⁻²
PER1	5187	O15534	-0.2	2.3 × 10⁻³	3.2 × 10⁻²
ELAVL2	1993	Q12926	-0.2	2.9 × 10⁻³	3.8 × 10⁻²
PODXL2	50512	Q9NZ53	-0.2	8.7 × 10⁻⁵	2.8 × 10⁻³
FBN2	2201	P35556	-0.2	1.7 × 10⁻⁴	4.7 × 10⁻³
PQBP1	10084	A0A0S2Z4V5	-0.2	9.4 × 10⁻⁴	1.7 × 10⁻²
MFHAS1	9258	Q9Y4C4	-0.2	1.5 × 10⁻³	2.4 × 10⁻²
MYO1D	4642	J3QRN6	-0.2	1.9 × 10⁻³	2.8 × 10⁻²
IGSF3	3321	O75054	-0.2	1.5 × 10⁻³	2.4 × 10⁻²
MAP1A	4130	P78559	-0.2	2.3 × 10⁻³	3.2 × 10⁻²
CHST3	9469	Q7LGC8	-0.2	4.1 × 10⁻³	4.9 × 10⁻²
TJP2	9414	B7Z2R3	-0.2	4.4 × 10⁻⁴	9.7 × 10⁻³
CA2	760	P00918	-0.2	7.2 × 10⁻⁴	1.4 × 10⁻²
LRATD2	157638	Q96KN1	-0.2	1.9 × 10⁻³	2.8 × 10⁻²
GNG12	55970	Q9UBI6	-0.2	1.0 × 10⁻³	1.8 × 10⁻²
PFKP	5214	Q01813	-0.2	1.0 × 10⁻³	1.8 × 10⁻²
MAGED2	10916	A0A024R9Y7	-0.2	4.8 × 10⁻⁴	1.0 × 10⁻²
CTSL	1514	A0A024R276	-0.2	2.5 × 10⁻³	3.4 × 10⁻²
SLC7A5	8140	Q01650	-0.2	2.3 × 10⁻⁴	5.7 × 10⁻³
SMARCA1	6594	B7ZLQ5	-0.2	8.0 × 10⁻⁴	1.5 × 10⁻²
OXCT1	5019	A0A024R040	-0.2	2.7 × 10⁻³	3.7 × 10⁻²
CDK6	1021	Q00534	-0.2	2.0 × 10⁻⁴	5.2 × 10⁻³
LIFR	3977	A8K1Z4	-0.2	7.6 × 10⁻⁴	1.5 × 10⁻²
JAG2	3714	Q9Y219	-0.2	2.7 × 10⁻³	3.7 × 10⁻²
NKX2-5	1482	A0A0S2Z3K2	-0.2	2.2 × 10⁻³	3.1 × 10⁻²
EN2	2020	P19622	-0.2	3.6 × 10⁻³	4.5 × 10⁻²
ACO1	48	P21399	-0.2	2.8 × 10⁻³	3.7 × 10⁻²
SAFB2	9667	Q14151	-0.2	3.3 × 10⁻³	4.2 × 10⁻²
CBX6	23466	B0QXZ6	-0.2	2.3 × 10⁻⁴	5.7 × 10⁻³
KIRREL1	55243	Q96J84	-0.2	3.9 × 10⁻³	4.7 × 10⁻²
RBMS1	5937	A0A0S2Z499	-0.2	3.2 × 10⁻³	4.1 × 10⁻²
CCND2	894	P30279	-0.2	9.1 × 10⁻⁴	1.7 × 10⁻²
FH	2271	A0A0S2Z4C3	-0.2	1.2 × 10⁻³	2.0 × 10⁻²
AUP1	550	Q9Y679	-0.2	4.0 × 10⁻³	4.9 × 10⁻²
TUB	7275	P50607	-0.2	2.4 × 10⁻³	3.3 × 10⁻²
GALNT2	2590	B7Z6K2	-0.2	1.6 × 10⁻³	2.5 × 10⁻²
CDC42EP1	11135	Q00587	-0.2	3.9 × 10⁻³	4.8 × 10⁻²
RAI14	26064	Q9P0K7	-0.2	2.0 × 10⁻³	3.0 × 10⁻²
SHB	6461	Q15464	-0.2	3.8 × 10⁻³	4.7 × 10⁻²
FSTL1	11167	Q12841	-0.1	3.9 × 10⁻³	4.8 × 10⁻²
MET	4233	A0A024R759	-0.1	3.3 × 10⁻³	4.2 × 10⁻²
CADM1	23705	Q9BY67	-0.1	2.9 × 10⁻³	3.8 × 10⁻²
FLNA	2316	P21333	-0.1	1.0 × 10⁻³	1.8 × 10⁻²
CLUH	23277	O75153	-0.1	2.8 × 10⁻³	3.7 × 10⁻²
TCOF1	6949	Q13428	-0.1	4.0 × 10⁻³	4.9 × 10⁻²
EIF4G1	1981	B2RU06	-0.1	3.5 × 10⁻³	4.4 × 10⁻²
SCRN1	9805	A0A090N7T9	0.1	4.0 × 10⁻³	4.8 × 10⁻²
HACD3	51495	Q9P035	0.1	1.5 × 10⁻³	2.4 × 10⁻²
SEC11A	23478	P67812	0.1	3.4 × 10⁻³	4.3 × 10⁻²
LRBA	987	P50851	0.1	3.7 × 10⁻³	4.6 × 10⁻²
DCP2	167227	Q8IU60	0.1	3.7 × 10⁻³	4.5 × 10⁻²
ADD3	120	Q9UEY8	0.1	3.5 × 10⁻³	4.3 × 10⁻²
LAPTM4B	55353	Q86VI4	0.1	1.2 × 10⁻³	2.0 × 10⁻²
AP3B1	8546	A0A0S2Z5J4	0.1	2.9 × 10⁻³	3.8 × 10⁻²
ATP6V1A	523	P38606	0.1	1.4 × 10⁻³	2.2 × 10⁻²
POGLUT3	143888	Q7Z4H8	0.1	2.7 × 10⁻³	3.7 × 10⁻²
ARHGAP5	394	Q13017	0.1	3.2 × 10⁻³	4.1 × 10⁻²
SEPTIN9	10801	Q9UHD8	0.2	2.1 × 10⁻³	3.1 × 10⁻²
PDCD4	27250	B4DKX4	0.2	4.1 × 10⁻³	4.9 × 10⁻²
SERINC3	10955	Q13530	0.2	3.5 × 10⁻³	4.4 × 10⁻²
VPS13A	23230	Q96RL7	0.2	3.3 × 10⁻³	4.2 × 10⁻²
ZMYM2	7750	A0A024RDS3	0.2	4.2 × 10⁻³	5.0 × 10⁻²
GJA1	2697	P17302	0.2	1.2 × 10⁻³	2.0 × 10⁻²
OSBPL8	114882	Q5HYM3	0.2	2.3 × 10⁻³	3.2 × 10⁻²
AP2B1	163	A0A140VJE8	0.2	2.7 × 10⁻³	3.7 × 10⁻²
CDH2	1000	P19022	0.2	2.0 × 10⁻³	3.0 × 10⁻²
FNDC3A	22862	A0A024RDT9	0.2	2.4 × 10⁻³	3.3 × 10⁻²
FYTTD1	84248	Q96QD9	0.2	2.3 × 10⁻³	3.3 × 10⁻²
REST	5978	Q13127	0.2	3.3 × 10⁻³	4.2 × 10⁻²
ADAM10	102	A0A024R5U5	0.2	2.5 × 10⁻³	3.4 × 10⁻²
PRR14L	253143	Q5THK1	0.2	1.1 × 10⁻³	1.9 × 10⁻²
PTK2	5747	Q05397	0.2	1.7 × 10⁻³	2.6 × 10⁻²
DST	667	B4DSS9	0.2	1.5 × 10⁻³	2.4 × 10⁻²
TMEM41B	440026	Q5BJD5	0.2	1.7 × 10⁻³	2.6 × 10⁻²
SELENOF	9403	O60613	0.2	3.2 × 10⁻³	4.1 × 10⁻²
SOX4	6659	Q06945	0.2	7.6 × 10⁻⁴	1.5 × 10⁻²
KIF15	56992	Q9NS87	0.2	3.2 × 10⁻³	4.1 × 10⁻²
CDS2	8760	O95674	0.2	2.0 × 10⁻³	2.9 × 10⁻²
GJC1	10052	P36383	0.2	3.7 × 10⁻³	4.5 × 10⁻²
SYNE2	23224	Q8WXH0	0.2	3.2 × 10⁻³	4.1 × 10⁻²
CLIP1	6249	P30622	0.2	2.8 × 10⁻³	3.7 × 10⁻²
HMGN4	10473	A0A024R046	0.2	2.3 × 10⁻³	3.2 × 10⁻²
ITM2B	9445	Q9Y287	0.2	8.7 × 10⁻⁴	1.6 × 10⁻²
USP46	64854	P62068	0.2	2.0 × 10⁻³	3.0 × 10⁻²
PIK3R3	8503	Q8N381	0.2	2.5 × 10⁻³	3.4 × 10⁻²
BARD1	580	A0AVN2	0.2	2.2 × 10⁻³	3.1 × 10⁻²
ELF2	1998	Q15723	0.2	1.8 × 10⁻³	2.7 × 10⁻²
SH3BGRL	6451	O75368	0.2	2.1 × 10⁻³	3.0 × 10⁻²
BLTP3A	54887	Q6BDS2	0.2	1.4 × 10⁻³	2.3 × 10⁻²
VCPIP1	80124	Q96JH7	0.2	1.8 × 10⁻³	2.7 × 10⁻²
NCOA2	10499	Q15596	0.2	1.3 × 10⁻³	2.1 × 10⁻²
APAF1	317	O14727	0.2	1.6 × 10⁻³	2.5 × 10⁻²
SCAMP1	9522	A0A087WXB0	0.2	4.3 × 10⁻⁴	9.6 × 10⁻³
MARCHF6	10299	O60337	0.2	8.6 × 10⁻⁴	1.6 × 10⁻²
SGPL1	8879	O95470	0.2	8.0 × 10⁻⁴	1.5 × 10⁻²
YES1	7525	P07947	0.2	2.7 × 10⁻⁴	6.6 × 10⁻³
KLHL5	51088	Q7Z6D5	0.2	1.8 × 10⁻³	2.7 × 10⁻²
NISCH	11188	Q9Y2I1	0.2	7.8 × 10⁻⁴	1.5 × 10⁻²
DUSP16	80824	A0A024RAR2	0.2	1.8 × 10⁻³	2.8 × 10⁻²
OSBPL1A	114876	Q9BXW6	0.2	1.9 × 10⁻³	2.8 × 10⁻²
AGPAT5	55326	A0A024R640	0.2	7.1 × 10⁻⁴	1.4 × 10⁻²
CAMK2D	817	A0A024RDK3	0.2	1.1 × 10⁻³	1.9 × 10⁻²
CHEK2	11200	O96017	0.2	2.0 × 10⁻³	3.0 × 10⁻²
GTSE1	51512	Q9NYZ3	0.2	6.9 × 10⁻⁴	1.4 × 10⁻²
NT5C2	22978	A8K6K2	0.2	2.4 × 10⁻³	3.4 × 10⁻²
MYO9A	4649	B2RTY4	0.2	4.4 × 10⁻⁴	9.8 × 10⁻³
ASB7	140460	A0A024RCD9	0.2	2.2 × 10⁻³	3.2 × 10⁻²
MALAT1	378938		0.2	5.1 × 10⁻⁴	1.1 × 10⁻²
ATP6V1H	51606	A0A024R7U9	0.2	1.3 × 10⁻³	2.1 × 10⁻²
HIPK2	28996	Q9H2X6	0.2	1.7 × 10⁻³	2.6 × 10⁻²
UGDH	7358	O60701	0.2	1.9 × 10⁻³	2.9 × 10⁻²
RIMKLB	57494	Q9ULI2	0.2	9.1 × 10⁻⁴	1.7 × 10⁻²
MYO6	4646	Q9UM54	0.2	9.8 × 10⁻⁴	1.8 × 10⁻²
SLC44A2	57153	A0A088QCU6	0.2	4.1 × 10⁻³	4.9 × 10⁻²
PTPRA	5786	P18433	0.2	6.0 × 10⁻⁴	1.3 × 10⁻²
HS2ST1	9653	Q7LGA3	0.2	9.0 × 10⁻⁵	2.8 × 10⁻³
CDK17	5128	Q00537	0.2	8.5 × 10⁻⁴	1.6 × 10⁻²
CDR2	1039	Q01850	0.2	1.4 × 10⁻³	2.3 × 10⁻²
KMT2E	55904	Q8IZD2	0.2	1.9 × 10⁻³	2.9 × 10⁻²
ZNF37BP	100129482		0.2	2.4 × 10⁻³	3.4 × 10⁻²
ISYNA1	51477	Q9NPH2	0.2	1.7 × 10⁻⁴	4.7 × 10⁻³
CEP120	153241	B4DLH5	0.2	2.3 × 10⁻³	3.3 × 10⁻²
B4GALT5	9334	O43286	0.2	1.2 × 10⁻³	2.0 × 10⁻²
RRM2B	50484	Q7LG56	0.2	8.2 × 10⁻⁴	1.6 × 10⁻²
NCOA3	8202	Q59EE8	0.2	8.5 × 10⁻⁴	1.6 × 10⁻²
DMXL2	23312	Q8TDJ6	0.2	1.7 × 10⁻³	2.7 × 10⁻²
SPIRE1	56907	Q08AE8	0.2	3.0 × 10⁻⁴	7.1 × 10⁻³
ERC1	23085	G8JLD3	0.2	1.5 × 10⁻³	2.5 × 10⁻²
IKBIP	121457	Q70UQ0	0.2	2.6 × 10⁻³	3.6 × 10⁻²
FBXO34	55030	A0A024R653	0.2	4.6 × 10⁻⁴	1.0 × 10⁻²
ESCO2	157570	Q56NI9	0.2	1.7 × 10⁻³	2.6 × 10⁻²
LAMA3	3909	A0A0A6YYF2	0.2	3.0 × 10⁻³	3.9 × 10⁻²
PRNP	5621	P04156	0.2	2.2 × 10⁻³	3.2 × 10⁻²
H1-0	3005	P07305	0.2	5.5 × 10⁻⁵	1.9 × 10⁻³
ADK	132	A0A140VJE0	0.2	4.5 × 10⁻⁴	1.0 × 10⁻²
PDE3B	5140	A7E2E5	0.2	8.8 × 10⁻⁵	2.8 × 10⁻³
MSL2	55167	Q9HCI7	0.2	3.4 × 10⁻³	4.3 × 10⁻²
SPATS2	65244	A0A024R101	0.2	4.1 × 10⁻³	4.9 × 10⁻²
SPECC1	92521	A0A024QYY9	0.2	7.0 × 10⁻⁴	1.4 × 10⁻²
EPB41L5	57669	Q9HCM4	0.2	3.4 × 10⁻³	4.3 × 10⁻²
FUT8	2530	Q546E0	0.2	2.9 × 10⁻³	3.8 × 10⁻²
EXOC4	60412	Q6NX51	0.2	1.8 × 10⁻⁴	4.9 × 10⁻³
SLC2A13	114134	Q96QE2	0.2	1.7 × 10⁻³	2.7 × 10⁻²
STAU2	27067	A0A0A0MTC5	0.2	2.1 × 10⁻⁴	5.3 × 10⁻³
SGPP1	81537	Q9BX95	0.2	8.4 × 10⁻⁴	1.6 × 10⁻²
WDR26	80232	Q9H7D7	0.2	1.3 × 10⁻⁴	3.8 × 10⁻³
NIPA1	123606	A0A024R344	0.2	2.5 × 10⁻³	3.5 × 10⁻²
FKBP9	11328	A7YQ73	0.2	5.3 × 10⁻⁴	1.1 × 10⁻²
CORO1C	23603	Q9ULV4	0.2	4.6 × 10⁻⁵	1.7 × 10⁻³
VAPB	9217	O95292	0.2	8.0 × 10⁻⁴	1.5 × 10⁻²
VPS13B	157680	Q7Z7G8	0.2	1.2 × 10⁻³	2.0 × 10⁻²
REEP2	51308	A8K3D2	0.2	3.9 × 10⁻³	4.7 × 10⁻²
WBP1L	54838	Q9NX94	0.2	8.2 × 10⁻⁴	1.6 × 10⁻²
SLC35A3	23443	Q9Y2D2	0.2	2.1 × 10⁻⁴	5.4 × 10⁻³
CECR2	27443	B7WPH3	0.2	7.0 × 10⁻⁵	2.3 × 10⁻³
WDR47	22911	O94967	0.2	1.7 × 10⁻³	2.6 × 10⁻²
EBF3	253738	Q9H4W6	0.2	1.0 × 10⁻³	1.9 × 10⁻²
GPC3	2719	P51654	0.2	5.0 × 10⁻⁴	1.1 × 10⁻²
ANK2	287	Q01484	0.2	1.8 × 10⁻³	2.8 × 10⁻²
SOS2	6655	Q07890	0.2	1.1 × 10⁻³	1.9 × 10⁻²
SFI1	9814	A8K8P3	0.2	4.2 × 10⁻³	5.0 × 10⁻²
TRPC1	7220	P48995	0.2	1.2 × 10⁻³	2.0 × 10⁻²
KIAA0232	9778	A5YKK5	0.2	6.5 × 10⁻⁵	2.2 × 10⁻³
LCP1	3936	A0A024RDT4	0.2	1.6 × 10⁻³	2.5 × 10⁻²
CLIC4	25932	Q6FIC5	0.2	1.9 × 10⁻⁶	1.3 × 10⁻⁴
ATXN7	6314	O15265	0.2	9.5 × 10⁻⁴	1.7 × 10⁻²
SENP7	57337	J3QT09	0.2	3.4 × 10⁻³	4.3 × 10⁻²
AGRN	375790	O00468	0.2	4.5 × 10⁻⁶	2.7 × 10⁻⁴
CNN2	1265	B4DDF4	0.3	8.3 × 10⁻⁴	1.6 × 10⁻²
SERPINF1	5176	A0A140VKF3	0.3	5.6 × 10⁻⁵	2.0 × 10⁻³
SSH2	85464	B4DK64	0.3	1.6 × 10⁻³	2.5 × 10⁻²
GID4	79018	B3KXL6	0.3	2.2 × 10⁻³	3.2 × 10⁻²
C16orf87	388272	Q6PH81	0.3	6.4 × 10⁻⁴	1.3 × 10⁻²
BAZ2B	29994	Q9UIF8	0.3	1.6 × 10⁻³	2.5 × 10⁻²
PLCH1	23007	Q4KWH8	0.3	2.6 × 10⁻³	3.5 × 10⁻²
ABHD3	171586	J3KTE1	0.3	2.1 × 10⁻³	3.1 × 10⁻²
GALK2	2585	Q01415	0.3	3.2 × 10⁻³	4.1 × 10⁻²
ZFP90	146198	Q8TF47	0.3	1.4 × 10⁻³	2.3 × 10⁻²
CDC25B	994	B4DIG0	0.3	1.1 × 10⁻⁴	3.4 × 10⁻³
EPHA7	2045	Q15375	0.3	2.2 × 10⁻⁶	1.5 × 10⁻⁴
SELENOP	6414	P49908	0.3	3.9 × 10⁻³	4.8 × 10⁻²
FBLN1	2192	P23142	0.3	3.2 × 10⁻⁴	7.6 × 10⁻³
LTBP1	4052	Q14766	0.3	1.5 × 10⁻⁵	7.0 × 10⁻⁴
GSTZ1	2954	O43708	0.3	2.2 × 10⁻³	3.2 × 10⁻²
PHTF1	10745	Q9UMS5	0.3	1.1 × 10⁻⁴	3.3 × 10⁻³
ID4	3400	P47928	0.3	3.1 × 10⁻⁷	3.0 × 10⁻⁵
FER	2241	P16591	0.3	2.0 × 10⁻⁵	8.9 × 10⁻⁴
EHHADH	1962	Q08426	0.3	1.2 × 10⁻³	2.1 × 10⁻²
IDH2	3418	P48735	0.3	1.2 × 10⁻⁵	5.9 × 10⁻⁴
TMEM87B	84910	Q96K49	0.3	3.0 × 10⁻³	3.9 × 10⁻²
PTBP2	58155	Q9UKA9	0.3	1.3 × 10⁻⁵	6.3 × 10⁻⁴
REEP3	221035	Q6NUK4	0.3	1.8 × 10⁻⁵	8.3 × 10⁻⁴
SEMA3C	10512	Q99985	0.3	8.3 × 10⁻⁴	1.6 × 10⁻²
HAS2	3037	Q92819	0.3	2.4 × 10⁻³	3.4 × 10⁻²
CCNG2	901	A0A024RDC7	0.3	1.3 × 10⁻³	2.1 × 10⁻²
FGD6	55785	Q6ZV73	0.3	1.5 × 10⁻³	2.4 × 10⁻²
CNNM2	54805	Q9H8M5	0.3	3.5 × 10⁻⁴	8.2 × 10⁻³
CLK1	1195	P49759	0.3	4.5 × 10⁻⁴	1.0 × 10⁻²
CDKN1A	1026	A0A024RCX5	0.3	2.8 × 10⁻³	3.7 × 10⁻²
SANBR	84542	Q6NSI8	0.3	4.0 × 10⁻³	4.8 × 10⁻²
SLC12A4	6560	B4DF30	0.3	1.5 × 10⁻³	2.4 × 10⁻²
ZNF654	55279		0.3	2.2 × 10⁻³	3.1 × 10⁻²
CLK4	57396	Q9HAZ1	0.3	2.3 × 10⁻³	3.2 × 10⁻²
DENND4A	10260	Q05C90	0.3	6.1 × 10⁻⁷	5.1 × 10⁻⁵
UCP2	7351	A0A024R5N5	0.3	1.3 × 10⁻³	2.2 × 10⁻²
BCHE	590	P06276	0.3	3.1 × 10⁻³	4.0 × 10⁻²
SPINT2	10653	A0A140VJV6	0.3	2.5 × 10⁻⁵	1.0 × 10⁻³
RPS27L	51065	Q71UM5	0.3	5.1 × 10⁻⁶	3.0 × 10⁻⁴
NEAT1	283131		0.3	1.5 × 10⁻³	2.4 × 10⁻²
LINC01605	100507420		0.3	3.6 × 10⁻³	4.5 × 10⁻²
ARHGDIG	398	F1T0H7	0.3	2.3 × 10⁻³	3.3 × 10⁻²
LGALS3BP	3959	A0A0S2Z3Y1	0.4	2.8 × 10⁻³	3.7 × 10⁻²
SRGAP2B	647135	A0A286YEY3	0.4	2.1 × 10⁻³	3.1 × 10⁻²
ZNF57	126295	A5HJR3	0.4	1.6 × 10⁻³	2.6 × 10⁻²
KIAA1958	158405	Q8N8K9	0.4	4.9 × 10⁻⁴	1.1 × 10⁻²
VAMP8	8673	Q9BV40	0.4	2.2 × 10⁻³	3.1 × 10⁻²
MDK	4192	P21741	0.4	9.9 × 10⁻⁶	5.1 × 10⁻⁴
DDB2	1643	Q92466	0.4	1.4 × 10⁻⁴	3.9 × 10⁻³
LIMD2	80774	A0A140VJN0	0.4	1.9 × 10⁻³	2.9 × 10⁻²
SKIDA1	387640	E9PAX1	0.4	6.8 × 10⁻⁴	1.4 × 10⁻²
CMBL	134147	Q96DG6	0.4	3.5 × 10⁻³	4.4 × 10⁻²
ZNF493	284443	Q6ZR52	0.4	3.3 × 10⁻³	4.2 × 10⁻²
TRAPPC6A	79090	B7TZ90	0.4	3.0 × 10⁻³	3.9 × 10⁻²
ADGRE5	976	P48960	0.4	1.4 × 10⁻⁴	4.0 × 10⁻³
BBC3	27113	Q96PG8	0.4	1.2 × 10⁻³	2.0 × 10⁻²
METTL7A	25840	A0A024R118	0.4	6.3 × 10⁻⁴	1.3 × 10⁻²
GCHFR	2644	P30047	0.4	1.6 × 10⁻³	2.5 × 10⁻²
MAP3K15	389840	Q6ZN16	0.4	7.5 × 10⁻⁴	1.5 × 10⁻²
FAT4	79633	B3KU84	0.4	1.3 × 10⁻⁶	9.1 × 10⁻⁵
NPTX1	4884	Q15818	0.4	2.6 × 10⁻⁹	6.5 × 10⁻⁷
ADAMTS5	11096	Q9UNA0	0.4	2.4 × 10⁻³	3.3 × 10⁻²
SLC66A3	130814	Q8N755	0.4	3.4 × 10⁻³	4.3 × 10⁻²
GPR137C	283554	B3KW22	0.5	1.6 × 10⁻³	2.5 × 10⁻²
EZH2	2146	Q15910	0.5	1.3 × 10⁻¹²	1.3 × 10⁻⁹
KCTD11	147040	A0A158RFT7	0.5	4.1 × 10⁻³	5.0 × 10⁻²
ZNF443	10224	Q9Y2A4	0.5	1.6 × 10⁻³	2.6 × 10⁻²
PCDH10	57575	Q9P2E7	0.5	2.3 × 10⁻¹¹	1.5 × 10⁻⁸
ZNF85	7639	Q49A12	0.6	6.4 × 10⁻⁴	1.3 × 10⁻²
ZNF681	148213	Q96N22	0.6	1.0 × 10⁻⁴	3.2 × 10⁻³
PCDH17	27253	O14917	0.6	2.7 × 10⁻¹⁰	1.1 × 10⁻⁷
ZNF737	100129842	O75373	0.6	7.1 × 10⁻⁴	1.4 × 10⁻²
ZNF83	55769	A0A024R4L3	0.6	1.1 × 10⁻³	1.9 × 10⁻²
EMILIN2	84034	Q9BXX0	0.6	9.8 × 10⁻¹¹	4.8 × 10⁻⁸
ZNF793	390927	Q6ZN11	0.7	3.8 × 10⁻⁴	8.6 × 10⁻³
ZNF808	388558	Q8N4W9	0.7	2.1 × 10⁻³	3.1 × 10⁻²
ESRP2	80004	Q9H6T0	0.8	3.1 × 10⁻³	4.0 × 10⁻²
SNORA33	594839		0.8	2.8 × 10⁻³	3.7 × 10⁻²
ZNF492	57615	Q9P255	0.8	2.0 × 10⁻⁴	5.2 × 10⁻³
DICER1-AS1	400242		0.8	2.1 × 10⁻³	3.0 × 10⁻²
ZNF429	353088	Q86V71	0.8	1.1 × 10⁻⁴	3.3 × 10⁻³
SH3D21	79729	A4FU49	0.9	1.6 × 10⁻³	2.5 × 10⁻²
ZNF506	440515	Q5JVG8	0.9	6.5 × 10⁻⁴	1.3 × 10⁻²
LUM	4060	P51884	0.9	1.6 × 10⁻³	2.5 × 10⁻²
SLC2A3	6515	P11169	0.9	6.2 × 10⁻⁴	1.3 × 10⁻²
ALPK3	57538	Q96L96	1.0	4.1 × 10⁻⁴	9.2 × 10⁻³
GPR50	9248	Q13585	1.1	3.5 × 10⁻⁴	8.1 × 10⁻³
MYLK4	340156	Q86YV6	1.1	3.9 × 10⁻³	4.8 × 10⁻²
APOBEC3B	9582	Q9UH17	1.1	2.6 × 10⁻⁵	1.1 × 10⁻³
SULT2A1	6822	A8K015	1.2	1.6 × 10⁻⁴	4.4 × 10⁻³
COL3A1	1281	P02461	1.3	7.9 × 10⁻⁸	1.0 × 10⁻⁵
GNRHR2	114814		1.4	1.7 × 10⁻³	2.6 × 10⁻²
DPEP1	1800	A0A140VJI3	2.0	7.5 × 10⁻⁵	2.5 × 10⁻³
PKP3	11187	Q9Y446	2.0	2.5 × 10⁻⁵	1.0 × 10⁻³

## Sheet: Proteomics
Symbol	EntrezID	Uniprot	logFC (Y641F/WT)	p-value	q-value
LSM7	51690	Q9UK45	-22.6	2.4 × 10⁻⁸	2.7 × 10⁻⁶
BAD	572	Q92934	-21.5	1.5 × 10⁻⁵	4.5 × 10⁻⁴
MEA1	4201	Q16626	-21.2	1.1 × 10⁻⁸	2.7 × 10⁻⁶
GLRA3	8001	O75311	-21.1	1.3 × 10⁻⁸	2.7 × 10⁻⁶
BCL7A	605	Q4VC05	-20.9	1.2 × 10⁻⁷	8.0 × 10⁻⁶
UBAC1	10422	Q9BSL1	-20.8	3.4 × 10⁻⁹	2.6 × 10⁻⁶
ELF1	1997	P32519	-20.1	1.7 × 10⁻⁸	2.7 × 10⁻⁶
SIRT5	23408	Q9NXA8	-20.1	1.4 × 10⁻⁸	2.7 × 10⁻⁶
CARNMT1	138199	Q8N4J0	-20.0	1.3 × 10⁻⁸	2.7 × 10⁻⁶
FAM107B	83641	Q9H098	-19.8	2.1 × 10⁻⁸	2.7 × 10⁻⁶
ZDHHC13	54503	Q8IUH4	-18.2	1.3 × 10⁻⁴	3.2 × 10⁻³
H3-7	440686	Q5TEC6	-4.4	9.7 × 10⁻⁶	3.0 × 10⁻⁴
LAGE3	8270	Q14657	-3.1	1.6 × 10⁻³	1.8 × 10⁻²
SLC37A4	2542	O43826	-2.9	1.7 × 10⁻⁵	5.0 × 10⁻⁴
ARL8B	55207	Q9NVJ2	-2.3	1.5 × 10⁻³	1.7 × 10⁻²
CACNA2D1	781	P54289	-2.3	1.0 × 10⁻²	4.7 × 10⁻²
EIF5A	1984	P63241	-2.3	9.0 × 10⁻³	4.4 × 10⁻²
LIMD1	8994	Q9UGP4	-2.2	2.8 × 10⁻⁴	5.8 × 10⁻³
POLR1E	64425	Q9GZS1	-2.2	9.6 × 10⁻⁴	1.4 × 10⁻²
B2M	567	P61769	-2.1	2.7 × 10⁻³	2.4 × 10⁻²
ZMYND11	10771	Q15326	-2.0	9.4 × 10⁻³	4.5 × 10⁻²
LSM8	51691	O95777	-2.0	2.1 × 10⁻³	2.1 × 10⁻²
SETDB1	9869	Q15047	-1.9	3.2 × 10⁻³	2.6 × 10⁻²
YIPF3	25844	Q9GZM5	-1.9	7.0 × 10⁻³	3.9 × 10⁻²
BASP1	10409	P80723	-1.8	3.3 × 10⁻⁴	6.5 × 10⁻³
MRPL32	64983	Q9BYC8	-1.8	1.2 × 10⁻²	5.0 × 10⁻²
UBE2R2	54926	Q712K3	-1.7	3.9 × 10⁻³	2.9 × 10⁻²
DNAAF10	116143	Q96MX6	-1.7	7.7 × 10⁻³	4.1 × 10⁻²
ERGIC1	57222	Q969X5	-1.7	4.4 × 10⁻³	3.1 × 10⁻²
CEP170	9859	Q5SW79	-1.6	4.2 × 10⁻³	3.0 × 10⁻²
GPSM1	26086	Q86YR5	-1.6	1.1 × 10⁻²	4.7 × 10⁻²
STX5	6811	Q13190	-1.6	2.9 × 10⁻³	2.4 × 10⁻²
RBX1	9978	P62877	-1.6	2.6 × 10⁻³	2.3 × 10⁻²
CCDC59	29080	Q9P031	-1.6	4.5 × 10⁻³	3.1 × 10⁻²
COX17	10063	Q14061	-1.6	5.7 × 10⁻³	3.5 × 10⁻²
TOMM20	9804	Q15388	-1.6	3.1 × 10⁻⁴	6.2 × 10⁻³
SUZ12	23512	Q15022	-1.6	4.7 × 10⁻³	3.2 × 10⁻²
ECD	11319	O95905	-1.6	1.1 × 10⁻²	4.9 × 10⁻²
ATP5IF1	93974	Q9UII2	-1.5	6.5 × 10⁻³	3.8 × 10⁻²
FUNDC2	65991	Q9BWH2	-1.5	1.3 × 10⁻³	1.6 × 10⁻²
NUDT1	4521	P36639	-1.5	4.4 × 10⁻³	3.0 × 10⁻²
TSR2	90121	Q969E8	-1.5	5.2 × 10⁻³	3.3 × 10⁻²
UBE2J1	51465	Q9Y385	-1.4	6.2 × 10⁻³	3.7 × 10⁻²
LARS2	23395	Q15031	-1.4	9.9 × 10⁻³	4.6 × 10⁻²
CCDC91	55297	Q7Z6B0	-1.4	7.6 × 10⁻³	4.0 × 10⁻²
KRT18	3875	P05783	-1.4	4.2 × 10⁻³	3.0 × 10⁻²
PSMG2	56984	Q969U7	-1.4	8.5 × 10⁻³	4.3 × 10⁻²
NRGN	4900	Q92686	-1.4	6.3 × 10⁻³	3.7 × 10⁻²
PTPRS	5802	Q13332	-1.4	2.9 × 10⁻³	2.5 × 10⁻²
RRP1B	23076	Q14684	-1.4	8.0 × 10⁻⁶	2.5 × 10⁻⁴
GDPD1	284161	Q8N9F7	-1.4	9.8 × 10⁻³	4.6 × 10⁻²
HYCC1	84668	Q9BYI3	-1.4	7.0 × 10⁻³	3.9 × 10⁻²
HMBS	3145	P08397	-1.4	5.1 × 10⁻⁴	9.2 × 10⁻³
MOB1B	92597	Q7L9L4	-1.4	2.9 × 10⁻³	2.5 × 10⁻²
PSPH	5723	P78330	-1.3	3.2 × 10⁻³	2.6 × 10⁻²
SRP72	6731	O76094	-1.3	8.1 × 10⁻³	4.2 × 10⁻²
ATP5F1E	514	P56381	-1.3	8.2 × 10⁻³	4.2 × 10⁻²
SUMO1	7341	P63165	-1.3	7.6 × 10⁻³	4.0 × 10⁻²
MARCKSL1	65108	P49006	-1.3	3.2 × 10⁻⁴	6.3 × 10⁻³
TOLLIP	54472	Q9H0E2	-1.3	1.1 × 10⁻²	4.9 × 10⁻²
POLR2F	5435	P61218	-1.3	7.5 × 10⁻³	4.0 × 10⁻²
MRPL3	11222	P09001	-1.3	9.2 × 10⁻³	4.4 × 10⁻²
PTMA	5757	P06454	-1.3	1.1 × 10⁻³	1.5 × 10⁻²
CLIP1	6249	P30622	-1.2	5.3 × 10⁻³	3.4 × 10⁻²
ZNHIT3	9326	Q15649	-1.2	7.6 × 10⁻³	4.1 × 10⁻²
SRSF6	6431	Q13247	-1.2	2.8 × 10⁻³	2.4 × 10⁻²
MPST	4357	P25325	-1.2	7.4 × 10⁻⁴	1.2 × 10⁻²
HMGA1	3159	P17096	-1.2	8.5 × 10⁻⁴	1.3 × 10⁻²
CEP55	55165	Q53EZ4	-1.2	1.1 × 10⁻²	4.9 × 10⁻²
ABHD11	83451	Q8NFV4	-1.2	9.9 × 10⁻³	4.6 × 10⁻²
PAK1IP1	55003	Q9NWT1	-1.1	4.2 × 10⁻³	3.0 × 10⁻²
GTF2B	2959	Q00403	-1.1	2.7 × 10⁻⁴	5.6 × 10⁻³
NIP7	51388	Q9Y221	-1.1	7.7 × 10⁻³	4.1 × 10⁻²
DIAPH3	81624	Q9NSV4	-1.1	5.2 × 10⁻³	3.3 × 10⁻²
EPB41	2035	P11171	-1.1	9.0 × 10⁻⁵	2.4 × 10⁻³
GSS	2937	P48637	-1.1	8.9 × 10⁻³	4.4 × 10⁻²
SH3GLB1	51100	Q9Y371	-1.1	8.7 × 10⁻³	4.3 × 10⁻²
GTPBP6	8225	O43824	-1.1	4.8 × 10⁻⁴	8.7 × 10⁻³
RRP9	9136	O43818	-1.1	1.3 × 10⁻³	1.6 × 10⁻²
DNAJC10	54431	Q8IXB1	-1.0	6.1 × 10⁻³	3.6 × 10⁻²
RPS25	6230	P62851	-1.0	9.0 × 10⁻⁴	1.3 × 10⁻²
EDF1	8721	O60869	-1.0	9.1 × 10⁻³	4.4 × 10⁻²
CSDE1	7812	O75534	-1.0	4.0 × 10⁻⁴	7.6 × 10⁻³
IVD	3712	P26440	-1.0	2.5 × 10⁻³	2.3 × 10⁻²
RNF114	55905	Q9Y508	-1.0	2.7 × 10⁻³	2.4 × 10⁻²
SRSF3	6428	P84103	-1.0	2.1 × 10⁻³	2.1 × 10⁻²
RPL13A	23521	P40429	-1.0	4.5 × 10⁻⁴	8.4 × 10⁻³
RPL34	6164	P49207	-1.0	8.2 × 10⁻³	4.2 × 10⁻²
RPS27AP5	100271374	A0A2R8Y422	-1.0	1.2 × 10⁻³	1.6 × 10⁻²
KNSTRN	90417	Q9Y448	-1.0	5.2 × 10⁻³	3.3 × 10⁻²
HDGFL2	84717	Q7Z4V5	-1.0	1.1 × 10⁻³	1.5 × 10⁻²
PSMB6	5694	P28072	-0.9	1.4 × 10⁻³	1.7 × 10⁻²
LIN28B	389421	Q6ZN17	-0.9	1.0 × 10⁻²	4.7 × 10⁻²
NCSTN	23385	Q92542	-0.9	7.5 × 10⁻³	4.0 × 10⁻²
PSMD8	5714	P48556	-0.9	8.8 × 10⁻³	4.4 × 10⁻²
OSBPL9	114883	Q96SU4	-0.9	1.8 × 10⁻³	1.9 × 10⁻²
CA2	760	P00918	-0.9	3.6 × 10⁻⁴	6.9 × 10⁻³
CBX1	10951	P83916	-0.9	2.8 × 10⁻³	2.4 × 10⁻²
ATP5F1D	513	P30049	-0.9	1.8 × 10⁻³	1.9 × 10⁻²
SEC61A1	29927	P61619	-0.9	4.1 × 10⁻³	3.0 × 10⁻²
PSMA4	5685	P25789	-0.9	6.7 × 10⁻³	3.8 × 10⁻²
BZW1	9689	Q7L1Q6	-0.9	7.7 × 10⁻³	4.1 × 10⁻²
SEC62	7095	Q99442	-0.9	5.9 × 10⁻⁴	1.0 × 10⁻²
NOLC1	9221	Q14978	-0.9	1.1 × 10⁻³	1.5 × 10⁻²
AFG3L2	10939	Q9Y4W6	-0.9	2.1 × 10⁻³	2.1 × 10⁻²
NOL11	25926	Q9H8H0	-0.9	3.5 × 10⁻³	2.7 × 10⁻²
PRIM1	5557	P49642	-0.9	3.0 × 10⁻³	2.5 × 10⁻²
CASC3	22794	O15234	-0.9	6.5 × 10⁻⁴	1.1 × 10⁻²
NDUFAF2	91942	Q8N183	-0.9	8.1 × 10⁻³	4.2 × 10⁻²
H2AZ1	3015	P0C0S5	-0.9	8.6 × 10⁻³	4.3 × 10⁻²
RPL36	25873	Q9Y3U8	-0.9	4.5 × 10⁻³	3.1 × 10⁻²
LUC7L2	51631	Q9Y383	-0.9	9.6 × 10⁻⁴	1.4 × 10⁻²
H4C11	8294	P62805	-0.9	1.3 × 10⁻³	1.6 × 10⁻²
COX5B	1329	P10606	-0.9	1.1 × 10⁻²	4.8 × 10⁻²
CD2BP2	10421	O95400	-0.9	7.2 × 10⁻³	4.0 × 10⁻²
RBM8A	9939	Q9Y5S9	-0.9	3.0 × 10⁻³	2.5 × 10⁻²
AKR1B1	231	P15121	-0.9	3.0 × 10⁻⁴	6.1 × 10⁻³
NLN	57486	Q9BYT8	-0.8	1.1 × 10⁻²	4.9 × 10⁻²
MARCKS	4082	P29966	-0.8	3.0 × 10⁻⁴	6.0 × 10⁻³
GTF2F1	2962	P35269	-0.8	2.7 × 10⁻³	2.4 × 10⁻²
RSRC2	65117	Q7L4I2	-0.8	8.9 × 10⁻³	4.4 × 10⁻²
CMSS1	84319	Q9BQ75	-0.8	8.2 × 10⁻³	4.2 × 10⁻²
PSMD14	10213	O00487	-0.8	5.5 × 10⁻³	3.5 × 10⁻²
RPL13	6137	P26373	-0.8	1.4 × 10⁻³	1.7 × 10⁻²
TMF1	7110	P82094	-0.8	7.6 × 10⁻³	4.1 × 10⁻²
RPL6	6128	Q02878	-0.8	6.2 × 10⁻⁴	1.0 × 10⁻²
FAU	2197	P62861	-0.8	7.0 × 10⁻³	3.9 × 10⁻²
SRSF7	6432	Q16629	-0.8	3.1 × 10⁻³	2.5 × 10⁻²
MAGED2	10916	Q9UNF1	-0.8	5.1 × 10⁻³	3.3 × 10⁻²
ACADM	34	P11310	-0.8	1.1 × 10⁻³	1.5 × 10⁻²
PGAM5	192111	Q96HS1	-0.8	5.2 × 10⁻⁵	1.4 × 10⁻³
FAM3A	60343	P98173	-0.8	6.8 × 10⁻³	3.9 × 10⁻²
GLO1	2739	Q04760	-0.8	3.6 × 10⁻³	2.7 × 10⁻²
STAU2	27067	Q9NUL3	-0.8	1.1 × 10⁻²	4.8 × 10⁻²
TCEAL4	79921	Q96EI5	-0.8	9.6 × 10⁻³	4.5 × 10⁻²
SHMT2	6472	P34897	-0.8	1.1 × 10⁻⁴	2.8 × 10⁻³
NT5C3B	115024	Q969T7	-0.8	7.5 × 10⁻³	4.0 × 10⁻²
ALDH6A1	4329	Q02252	-0.8	9.3 × 10⁻³	4.4 × 10⁻²
IGF2BP2	10644	Q9Y6M1	-0.7	2.9 × 10⁻³	2.5 × 10⁻²
HSP90AA1	3320	P07900	-0.7	1.6 × 10⁻⁴	3.7 × 10⁻³
EEF1D	1936	P29692	-0.7	9.7 × 10⁻³	4.5 × 10⁻²
PGM1	5236	P36871	-0.7	1.9 × 10⁻³	1.9 × 10⁻²
MAPK1	5594	P28482	-0.7	1.1 × 10⁻²	4.9 × 10⁻²
CBX3	11335	Q13185	-0.7	1.1 × 10⁻³	1.5 × 10⁻²
RPS19	6223	P39019	-0.7	1.5 × 10⁻³	1.7 × 10⁻²
LSG1	55341	Q9H089	-0.7	4.0 × 10⁻³	2.9 × 10⁻²
CDC37	11140	Q16543	-0.7	1.2 × 10⁻³	1.6 × 10⁻²
SAFB	6294	Q15424	-0.7	1.0 × 10⁻³	1.5 × 10⁻²
SSR1	6745	P43307	-0.7	1.1 × 10⁻²	4.9 × 10⁻²
PRDX1	5052	Q06830	-0.7	4.7 × 10⁻⁴	8.7 × 10⁻³
PACSIN2	11252	Q9UNF0	-0.7	1.7 × 10⁻³	1.8 × 10⁻²
RPL29	6159	P47914	-0.7	6.3 × 10⁻⁴	1.1 × 10⁻²
YARS1	8565	P54577	-0.7	5.4 × 10⁻⁵	1.5 × 10⁻³
PGRMC1	10857	O00264	-0.7	2.7 × 10⁻³	2.4 × 10⁻²
ETFB	2109	P38117	-0.7	1.5 × 10⁻³	1.7 × 10⁻²
NKRF	55922	O15226	-0.7	2.3 × 10⁻³	2.2 × 10⁻²
PLGRKT	55848	Q9HBL7	-0.7	7.4 × 10⁻³	4.0 × 10⁻²
NME1	4830	P15531	-0.7	2.3 × 10⁻³	2.2 × 10⁻²
TXNDC17	84817	Q9BRA2	-0.7	1.1 × 10⁻²	4.7 × 10⁻²
RPL8	6132	P62917	-0.7	1.4 × 10⁻³	1.7 × 10⁻²
RPL18A	6142	Q02543	-0.7	1.9 × 10⁻⁴	4.2 × 10⁻³
RPL7	6129	P18124	-0.7	1.5 × 10⁻³	1.7 × 10⁻²
HMGA2	8091	P52926	-0.7	9.2 × 10⁻³	4.4 × 10⁻²
CNPY2	10330	Q9Y2B0	-0.7	1.1 × 10⁻²	4.8 × 10⁻²
COX4I1	1327	P13073	-0.7	7.4 × 10⁻³	4.0 × 10⁻²
PRDX2	7001	P32119	-0.7	1.3 × 10⁻³	1.6 × 10⁻²
CLTB	1212	P09497	-0.7	8.5 × 10⁻³	4.3 × 10⁻²
PEX12	5193	O00623	-0.7	3.7 × 10⁻³	2.8 × 10⁻²
RPL15	6138	P61313	-0.7	6.6 × 10⁻⁴	1.1 × 10⁻²
RPL27A	6157	P46776	-0.7	2.9 × 10⁻³	2.4 × 10⁻²
RRP15	51018	Q9Y3B9	-0.6	9.4 × 10⁻³	4.5 × 10⁻²
CDK13	8621	Q14004	-0.6	1.9 × 10⁻³	1.9 × 10⁻²
HSPE1	3336	P61604	-0.6	2.1 × 10⁻³	2.0 × 10⁻²
SUCLA2	8803	Q9P2R7	-0.6	5.9 × 10⁻³	3.6 × 10⁻²
NASP	4678	P49321	-0.6	7.6 × 10⁻⁴	1.2 × 10⁻²
ANXA7	310	P20073	-0.6	3.9 × 10⁻³	2.9 × 10⁻²
RPS6	6194	P62753	-0.6	6.9 × 10⁻⁴	1.1 × 10⁻²
GLRX3	10539	O76003	-0.6	2.5 × 10⁻⁴	5.2 × 10⁻³
RPS16	6217	P62249	-0.6	7.3 × 10⁻³	4.0 × 10⁻²
LMNB2	84823	Q03252	-0.6	6.0 × 10⁻³	3.6 × 10⁻²
MAP4	4134	P27816	-0.6	2.4 × 10⁻⁴	5.2 × 10⁻³
GRPEL1	80273	Q9HAV7	-0.6	1.2 × 10⁻³	1.6 × 10⁻²
ZC3H15	55854	Q8WU90	-0.6	7.2 × 10⁻⁴	1.1 × 10⁻²
FKBP5	2289	Q13451	-0.6	8.7 × 10⁻³	4.3 × 10⁻²
PPIH	10465	O43447	-0.6	1.1 × 10⁻²	4.9 × 10⁻²
DOCK7	85440	Q96N67	-0.6	6.2 × 10⁻³	3.7 × 10⁻²
AK2	204	P54819	-0.6	2.1 × 10⁻⁴	4.6 × 10⁻³
LDHA	3939	P00338	-0.6	6.2 × 10⁻⁴	1.0 × 10⁻²
NSFL1C	55968	Q9UNZ2	-0.6	5.8 × 10⁻³	3.6 × 10⁻²
SUGT1	10910	Q9Y2Z0	-0.6	7.4 × 10⁻³	4.0 × 10⁻²
PES1	23481	O00541	-0.6	9.1 × 10⁻³	4.4 × 10⁻²
RPS9	6203	P46781	-0.6	1.9 × 10⁻³	2.0 × 10⁻²
RPS2	6187	P15880	-0.6	1.8 × 10⁻³	1.9 × 10⁻²
STT3A	3703	P46977	-0.6	1.2 × 10⁻²	5.0 × 10⁻²
TUBB4B	10383	P68371	-0.6	6.3 × 10⁻³	3.7 × 10⁻²
EPB41L2	2037	O43491	-0.6	1.4 × 10⁻³	1.7 × 10⁻²
EIF4A3	9775	P38919	-0.6	7.2 × 10⁻³	4.0 × 10⁻²
CTTN	2017	Q14247	-0.6	1.5 × 10⁻³	1.7 × 10⁻²
HADHB	3032	P55084	-0.6	1.5 × 10⁻³	1.7 × 10⁻²
TCOF1	6949	Q13428	-0.6	9.7 × 10⁻⁴	1.4 × 10⁻²
WDR44	54521	Q5JSH3	-0.6	6.8 × 10⁻³	3.9 × 10⁻²
EWSR1	2130	Q01844	-0.6	1.6 × 10⁻³	1.8 × 10⁻²
RPL18	6141	Q07020	-0.6	1.5 × 10⁻³	1.7 × 10⁻²
SRSF1	6426	Q07955	-0.6	4.3 × 10⁻³	3.0 × 10⁻²
RPS15	6209	P62841	-0.6	2.6 × 10⁻³	2.3 × 10⁻²
MKI67	4288	P46013	-0.6	9.3 × 10⁻⁴	1.4 × 10⁻²
CS	1431	O75390	-0.6	5.7 × 10⁻³	3.5 × 10⁻²
P4HB	5034	P07237	-0.6	1.5 × 10⁻³	1.7 × 10⁻²
RPS3	6188	P23396	-0.6	2.1 × 10⁻³	2.1 × 10⁻²
RPL10	6134	P27635	-0.6	2.3 × 10⁻³	2.2 × 10⁻²
IARS2	55699	Q9NSE4	-0.6	8.9 × 10⁻⁴	1.3 × 10⁻²
EIF2S1	1965	P05198	-0.6	3.4 × 10⁻³	2.6 × 10⁻²
RPS11	6205	P62280	-0.6	1.3 × 10⁻³	1.7 × 10⁻²
SKP1	6500	P63208	-0.6	7.4 × 10⁻³	4.0 × 10⁻²
FUBP1	8880	Q96AE4	-0.6	4.0 × 10⁻³	2.9 × 10⁻²
HNRNPF	3185	P52597	-0.6	2.0 × 10⁻³	2.0 × 10⁻²
CSTF3	1479	Q12996	-0.5	6.2 × 10⁻³	3.7 × 10⁻²
MSH2	4436	P43246	-0.5	9.3 × 10⁻³	4.4 × 10⁻²
MAVS	57506	Q7Z434	-0.5	6.0 × 10⁻³	3.6 × 10⁻²
NCL	4691	P19338	-0.5	3.2 × 10⁻³	2.6 × 10⁻²
DCPS	28960	Q96C86	-0.5	7.3 × 10⁻³	4.0 × 10⁻²
WBP11	51729	Q9Y2W2	-0.5	5.0 × 10⁻³	3.3 × 10⁻²
NAMPT	10135	P43490	-0.5	8.7 × 10⁻³	4.3 × 10⁻²
AKAP1	8165	Q92667	-0.5	5.5 × 10⁻³	3.5 × 10⁻²
PHB2	11331	Q99623	-0.5	5.1 × 10⁻³	3.3 × 10⁻²
HNRNPU	3192	Q00839	-0.5	1.2 × 10⁻³	1.6 × 10⁻²
RPL32	6161	P62910	-0.5	3.9 × 10⁻³	2.9 × 10⁻²
PREP	5550	P48147	-0.5	6.4 × 10⁻³	3.8 × 10⁻²
PDIA3	2923	P30101	-0.5	1.1 × 10⁻³	1.5 × 10⁻²
NEFM	4741	P07197	-0.5	6.0 × 10⁻⁴	1.0 × 10⁻²
HNRNPA1	3178	P09651	-0.5	4.1 × 10⁻³	3.0 × 10⁻²
VCL	7414	P18206	-0.5	1.3 × 10⁻³	1.7 × 10⁻²
PA2G4	5036	Q9UQ80	-0.5	2.5 × 10⁻³	2.3 × 10⁻²
ATP5F1A	498	P25705	-0.5	2.6 × 10⁻³	2.3 × 10⁻²
NSF	4905	P46459	-0.5	9.0 × 10⁻³	4.4 × 10⁻²
HNRNPA2B1	3181	P22626	-0.5	5.7 × 10⁻³	3.5 × 10⁻²
HNRNPM	4670	P52272	-0.5	3.2 × 10⁻³	2.6 × 10⁻²
PSMA3	5684	P25788	-0.5	9.1 × 10⁻³	4.4 × 10⁻²
HNRNPK	3190	P61978	-0.5	1.6 × 10⁻³	1.8 × 10⁻²
LMNB1	4001	P20700	-0.5	7.2 × 10⁻⁴	1.1 × 10⁻²
PRKCSH	5589	P14314	-0.5	3.6 × 10⁻³	2.8 × 10⁻²
AMOT	154796	Q4VCS5	-0.5	2.5 × 10⁻³	2.3 × 10⁻²
TALDO1	6888	P37837	-0.5	2.3 × 10⁻³	2.2 × 10⁻²
RPL3	6122	P39023	-0.5	1.7 × 10⁻³	1.8 × 10⁻²
HECTD1	25831	Q9ULT8	-0.5	7.5 × 10⁻³	4.0 × 10⁻²
KHDRBS1	10657	Q07666	-0.5	5.7 × 10⁻³	3.5 × 10⁻²
ENSA	2029	O43768	-0.5	1.1 × 10⁻²	4.9 × 10⁻²
RTCB	51493	Q9Y3I0	-0.5	1.5 × 10⁻³	1.7 × 10⁻²
HSP90B1	7184	P14625	-0.5	4.3 × 10⁻³	3.0 × 10⁻²
RPS18	6222	P62269	-0.5	7.8 × 10⁻³	4.1 × 10⁻²
SFPQ	6421	P23246	-0.5	1.4 × 10⁻³	1.7 × 10⁻²
SMC2	10592	O95347	-0.5	5.2 × 10⁻³	3.3 × 10⁻²
FAM50A	9130	Q14320	-0.5	1.8 × 10⁻³	1.9 × 10⁻²
BCLAF1	9774	Q9NYF8	-0.5	1.1 × 10⁻²	4.9 × 10⁻²
SF3B1	23451	O75533	-0.5	2.2 × 10⁻³	2.1 × 10⁻²
LDHB	3945	P07195	-0.4	5.8 × 10⁻³	3.6 × 10⁻²
SARNP	84324	P82979	-0.4	7.0 × 10⁻³	3.9 × 10⁻²
PSMB5	5693	P28074	-0.4	7.3 × 10⁻³	4.0 × 10⁻²
PABPC1	26986	P11940	-0.4	1.1 × 10⁻²	4.8 × 10⁻²
G3BP1	10146	Q13283	-0.4	6.4 × 10⁻⁴	1.1 × 10⁻²
VIM	7431	P08670	-0.4	4.0 × 10⁻³	2.9 × 10⁻²
ALDOA	226	P04075	-0.4	5.4 × 10⁻⁴	9.6 × 10⁻³
LONP1	9361	P36776	-0.4	6.9 × 10⁻³	3.9 × 10⁻²
NME2	4831	P22392	-0.4	1.1 × 10⁻²	4.9 × 10⁻²
SERBP1	26135	Q8NC51	-0.4	2.3 × 10⁻³	2.2 × 10⁻²
SSB	6741	P05455	-0.4	3.2 × 10⁻³	2.6 × 10⁻²
KHSRP	8570	Q92945	-0.4	1.3 × 10⁻³	1.7 × 10⁻²
DNAJC7	7266	Q99615	-0.4	8.4 × 10⁻³	4.3 × 10⁻²
RAB7A	7879	P51149	-0.4	6.7 × 10⁻³	3.9 × 10⁻²
RANGAP1	5905	P46060	-0.4	1.7 × 10⁻³	1.8 × 10⁻²
PLS3	5358	P13797	-0.4	6.4 × 10⁻³	3.7 × 10⁻²
RPL23A	6147	P62750	-0.4	1.1 × 10⁻²	4.9 × 10⁻²
SRSF9	8683	Q13242	-0.4	1.1 × 10⁻²	4.9 × 10⁻²
STIP1	10963	P31948	-0.4	4.2 × 10⁻³	3.0 × 10⁻²
ATP2A2	488	P16615	-0.4	9.5 × 10⁻³	4.5 × 10⁻²
XRCC5	7520	P13010	-0.4	4.7 × 10⁻³	3.2 × 10⁻²
TKT	7086	P29401	-0.4	6.0 × 10⁻³	3.6 × 10⁻²
CKAP4	10970	Q07065	-0.4	1.1 × 10⁻²	4.8 × 10⁻²
CAP1	10487	Q01518	-0.4	8.2 × 10⁻³	4.2 × 10⁻²
EEF1G	1937	P26641	-0.4	2.9 × 10⁻³	2.4 × 10⁻²
PHGDH	26227	O43175	-0.3	1.0 × 10⁻²	4.6 × 10⁻²
PRDX6	9588	P30041	-0.3	5.1 × 10⁻³	3.3 × 10⁻²
PKM	5315	P14618	-0.3	2.2 × 10⁻³	2.1 × 10⁻²
CCT8	10694	P50990	-0.3	5.6 × 10⁻³	3.5 × 10⁻²
RPL7A	6130	P62424	-0.3	1.2 × 10⁻²	5.0 × 10⁻²
PARP1	142	P09874	-0.3	2.0 × 10⁻³	2.0 × 10⁻²
PFN1	5216	P07737	-0.3	9.5 × 10⁻³	4.5 × 10⁻²
VCP	7415	P55072	-0.3	4.9 × 10⁻³	3.3 × 10⁻²
SF3B3	23450	Q15393	-0.3	8.9 × 10⁻³	4.4 × 10⁻²
HSPA8	3312	P11142	-0.3	3.2 × 10⁻³	2.6 × 10⁻²
PRKDC	5591	P78527	-0.3	7.1 × 10⁻³	4.0 × 10⁻²
TUBB	203068	P07437	0.3	1.0 × 10⁻²	4.7 × 10⁻²
PLEC	5339	Q15149	0.3	6.1 × 10⁻³	3.6 × 10⁻²
SELENOF	9403	O60613	0.4	1.0 × 10⁻²	4.7 × 10⁻²
SYNCRIP	10492	O60506	0.4	9.8 × 10⁻³	4.6 × 10⁻²
PRRC2A	7916	P48634	0.5	1.1 × 10⁻²	4.8 × 10⁻²
NRDC	4898	O43847	0.5	1.1 × 10⁻²	4.9 × 10⁻²
DARS2	55157	Q6PI48	0.5	4.6 × 10⁻³	3.2 × 10⁻²
COPG1	22820	Q9Y678	0.5	1.1 × 10⁻²	4.9 × 10⁻²
PSME3	10197	P61289	0.5	5.7 × 10⁻³	3.5 × 10⁻²
SERPINH1	871	P50454	0.5	1.6 × 10⁻³	1.8 × 10⁻²
COPG2	26958	Q9UBF2	0.5	7.6 × 10⁻³	4.1 × 10⁻²
DUT	1854	P33316	0.6	4.9 × 10⁻³	3.3 × 10⁻²
PRMT5	10419	O14744	0.6	8.3 × 10⁻³	4.2 × 10⁻²
HNRNPR	10236	O43390	0.6	6.1 × 10⁻⁴	1.0 × 10⁻²
HSD17B10	3028	Q99714	0.6	2.6 × 10⁻³	2.3 × 10⁻²
NOC4L	79050	Q9BVI4	0.6	2.8 × 10⁻³	2.4 × 10⁻²
SMARCE1	6605	Q969G3	0.6	8.9 × 10⁻³	4.4 × 10⁻²
SNRPE	6635	P62304	0.6	9.7 × 10⁻³	4.5 × 10⁻²
MTCH2	23788	Q9Y6C9	0.6	1.1 × 10⁻²	4.9 × 10⁻²
PFKL	5211	P17858	0.6	1.0 × 10⁻²	4.6 × 10⁻²
DNM2	1785	P50570	0.6	3.6 × 10⁻³	2.7 × 10⁻²
EIF1	10209	P41567	0.7	8.1 × 10⁻³	4.2 × 10⁻²
LRRC59	55379	Q96AG4	0.7	1.4 × 10⁻³	1.7 × 10⁻²
ADNP	23394	Q9H2P0	0.7	5.9 × 10⁻⁴	1.0 × 10⁻²
CLPP	8192	Q16740	0.7	1.0 × 10⁻²	4.6 × 10⁻²
SCML2	10389	Q9UQR0	0.7	1.0 × 10⁻²	4.6 × 10⁻²
SIN3A	25942	Q96ST3	0.7	7.7 × 10⁻³	4.1 × 10⁻²
DIDO1	11083	Q9BTC0	0.7	8.1 × 10⁻³	4.2 × 10⁻²
RUFY1	80230	Q96T51	0.7	1.1 × 10⁻²	4.8 × 10⁻²
DNAAF5	54919	Q86Y56	0.8	7.5 × 10⁻³	4.0 × 10⁻²
EML4	27436	Q9HC35	0.8	4.8 × 10⁻⁴	8.7 × 10⁻³
CISD1	55847	Q9NZ45	0.8	2.7 × 10⁻³	2.4 × 10⁻²
CCDC88A	55704	Q3V6T2	0.8	8.7 × 10⁻³	4.3 × 10⁻²
TNKS1BP1	85456	Q9C0C2	0.8	3.7 × 10⁻³	2.8 × 10⁻²
GSR	2936	P00390	0.8	1.7 × 10⁻³	1.8 × 10⁻²
PPP4R3A	55671	Q6IN85	0.8	3.3 × 10⁻³	2.6 × 10⁻²
USP39	10713	Q53GS9	0.8	6.5 × 10⁻³	3.8 × 10⁻²
SNX27	81609	Q96L92	0.8	7.5 × 10⁻³	4.0 × 10⁻²
PELP1	27043	Q8IZL8	0.8	5.8 × 10⁻³	3.6 × 10⁻²
PDXDC1	23042	Q6P996	0.8	9.0 × 10⁻³	4.4 × 10⁻²
METAP1	23173	P53582	0.8	9.7 × 10⁻⁴	1.4 × 10⁻²
ZC3H4	23211	Q9UPT8	0.8	6.8 × 10⁻³	3.9 × 10⁻²
GNPAT	8443	O15228	0.9	2.1 × 10⁻³	2.1 × 10⁻²
HUWE1	10075	Q7Z6Z7	0.9	6.6 × 10⁻³	3.8 × 10⁻²
TTK	7272	P33981	0.9	7.2 × 10⁻⁴	1.1 × 10⁻²
PDIA5	10954	Q14554	0.9	7.0 × 10⁻³	3.9 × 10⁻²
GLUD1	2746	P00367	0.9	1.4 × 10⁻³	1.7 × 10⁻²
GNPNAT1	64841	Q96EK6	0.9	7.2 × 10⁻³	4.0 × 10⁻²
COPS6	10980	Q7L5N1	0.9	9.3 × 10⁻³	4.4 × 10⁻²
BCOR	54880	Q6W2J9	0.9	7.9 × 10⁻³	4.1 × 10⁻²
LPCAT1	79888	Q8NF37	0.9	1.7 × 10⁻³	1.9 × 10⁻²
DICER1	23405	Q9UPY3	0.9	4.4 × 10⁻³	3.0 × 10⁻²
MMAB	326625	Q96EY8	0.9	6.6 × 10⁻³	3.8 × 10⁻²
PEX14	5195	O75381	0.9	1.1 × 10⁻²	4.8 × 10⁻²
C1QBP	708	Q07021	0.9	8.5 × 10⁻³	4.3 × 10⁻²
RPN2	6185	P04844	0.9	6.1 × 10⁻³	3.6 × 10⁻²
SETD1A	9739	O15047	0.9	2.8 × 10⁻³	2.4 × 10⁻²
AUP1	550	Q9Y679	0.9	9.8 × 10⁻³	4.6 × 10⁻²
GCC2	9648	Q8IWJ2	0.9	1.8 × 10⁻³	1.9 × 10⁻²
EXOC4	60412	Q96A65	0.9	1.0 × 10⁻³	1.4 × 10⁻²
TUBA4A	7277	P68366	0.9	6.6 × 10⁻⁴	1.1 × 10⁻²
RFC1	5981	P35251	0.9	4.1 × 10⁻³	2.9 × 10⁻²
PRKCI	5584	P41743	0.9	1.4 × 10⁻³	1.7 × 10⁻²
RO60	6738	P10155	0.9	8.2 × 10⁻³	4.2 × 10⁻²
NDUFV2	4729	P19404	1.0	1.8 × 10⁻³	1.9 × 10⁻²
TUBB6	84617	Q9BUF5	1.0	3.4 × 10⁻³	2.6 × 10⁻²
SMPD4	55627	Q9NXE4	1.0	7.3 × 10⁻⁴	1.1 × 10⁻²
CENPF	1063	P49454	1.0	8.3 × 10⁻³	4.2 × 10⁻²
SQSTM1	8878	Q13501	1.0	6.6 × 10⁻³	3.8 × 10⁻²
AATF	26574	Q9NY61	1.0	2.5 × 10⁻³	2.3 × 10⁻²
PSMD10	5716	O75832	1.0	1.4 × 10⁻³	1.7 × 10⁻²
SSR3	6747	Q9UNL2	1.0	4.9 × 10⁻³	3.3 × 10⁻²
GNB1	2782	P62873	1.0	2.7 × 10⁻³	2.4 × 10⁻²
LAMTOR1	55004	Q6IAA8	1.0	4.3 × 10⁻³	3.0 × 10⁻²
SCYL2	55681	Q6P3W7	1.0	5.2 × 10⁻³	3.3 × 10⁻²
EIF2AK3	9451	Q9NZJ5	1.0	1.1 × 10⁻²	4.9 × 10⁻²
SLIT2	9353	O94813	1.1	9.1 × 10⁻³	4.4 × 10⁻²
OGFR	11054	Q9NZT2	1.1	5.6 × 10⁻⁴	9.9 × 10⁻³
PCCB	5096	P05166	1.1	3.2 × 10⁻³	2.6 × 10⁻²
WASHC4	23325	Q2M389	1.1	6.8 × 10⁻³	3.9 × 10⁻²
BCAT1	586	P54687	1.1	6.4 × 10⁻³	3.7 × 10⁻²
EIF2B4	8890	Q9UI10	1.1	5.2 × 10⁻³	3.3 × 10⁻²
DRG2	1819	P55039	1.1	3.6 × 10⁻³	2.7 × 10⁻²
ATRX	546	P46100	1.1	2.1 × 10⁻⁵	6.2 × 10⁻⁴
AASDHPPT	60496	Q9NRN7	1.1	3.0 × 10⁻³	2.5 × 10⁻²
NBN	4683	O60934	1.1	9.1 × 10⁻³	4.4 × 10⁻²
MCAT	27349	Q8IVS2	1.1	9.8 × 10⁻³	4.6 × 10⁻²
NOC3L	64318	Q8WTT2	1.1	3.8 × 10⁻³	2.9 × 10⁻²
CKS1B	1163	P61024	1.1	6.5 × 10⁻⁴	1.1 × 10⁻²
MED12	9968	Q93074	1.1	5.2 × 10⁻³	3.3 × 10⁻²
PTK2	5747	Q05397	1.1	4.2 × 10⁻³	3.0 × 10⁻²
DNAJC13	23317	O75165	1.1	3.9 × 10⁻³	2.9 × 10⁻²
QPRT	23475	Q15274	1.1	3.9 × 10⁻³	2.9 × 10⁻²
SNRPD3	6634	P62318	1.2	1.9 × 10⁻³	1.9 × 10⁻²
TM9SF1	10548	O15321	1.2	4.5 × 10⁻³	3.1 × 10⁻²
FCHO2	115548	Q0JRZ9	1.2	8.6 × 10⁻³	4.3 × 10⁻²
KDM3B	51780	Q7LBC6	1.2	3.7 × 10⁻³	2.8 × 10⁻²
NME7	29922	Q9Y5B8	1.2	5.0 × 10⁻³	3.3 × 10⁻²
DCAF7	10238	P61962	1.2	5.3 × 10⁻³	3.4 × 10⁻²
SH3BGRL	6451	O75368	1.2	4.0 × 10⁻³	2.9 × 10⁻²
COX15	1355	Q7KZN9	1.2	2.5 × 10⁻³	2.3 × 10⁻²
LRRC8E	80131	Q6NSJ5	1.2	1.2 × 10⁻²	5.0 × 10⁻²
RDH13	112724	Q8NBN7	1.2	5.6 × 10⁻³	3.5 × 10⁻²
RPP38	10557	P78345	1.2	5.3 × 10⁻³	3.4 × 10⁻²
FASTKD5	60493	Q7L8L6	1.2	4.2 × 10⁻³	3.0 × 10⁻²
ATF1	466	P18846	1.2	5.9 × 10⁻³	3.6 × 10⁻²
PRPF38B	55119	Q5VTL8	1.2	1.0 × 10⁻⁴	2.7 × 10⁻³
TRIM65	201292	Q6PJ69	1.2	5.6 × 10⁻³	3.5 × 10⁻²
SH3BP1	23616	Q9Y3L3	1.2	2.9 × 10⁻³	2.5 × 10⁻²
FBN1	2200	P35555	1.2	4.1 × 10⁻³	3.0 × 10⁻²
AGTRAP	57085	Q6RW13	1.2	1.0 × 10⁻²	4.6 × 10⁻²
PEX19	5824	P40855	1.2	1.4 × 10⁻³	1.7 × 10⁻²
CUTC	51076	Q9NTM9	1.3	3.0 × 10⁻⁵	8.6 × 10⁻⁴
ZNF143	7702	P52747	1.3	7.4 × 10⁻³	4.0 × 10⁻²
SUN1	23353	O94901	1.3	8.5 × 10⁻³	4.3 × 10⁻²
VCPIP1	80124	Q96JH7	1.3	7.6 × 10⁻⁴	1.2 × 10⁻²
KHK	3795	P50053	1.3	7.3 × 10⁻³	4.0 × 10⁻²
NDRG2	57447	Q9UN36	1.3	8.7 × 10⁻³	4.3 × 10⁻²
MGA	23269	Q8IWI9	1.3	3.9 × 10⁻³	2.9 × 10⁻²
PTTG1IP	754	P53801	1.3	6.4 × 10⁻³	3.8 × 10⁻²
RPL7L1	285855	Q6DKI1	1.3	1.4 × 10⁻⁴	3.4 × 10⁻³
LRRC8A	56262	Q8IWT6	1.3	7.2 × 10⁻³	4.0 × 10⁻²
ELP1	8518	O95163	1.3	1.3 × 10⁻⁴	3.1 × 10⁻³
NEDD4	4734	P46934	1.3	8.4 × 10⁻³	4.2 × 10⁻²
POGLUT2	79070	Q6UW63	1.3	4.0 × 10⁻³	2.9 × 10⁻²
EXOSC7	23016	Q15024	1.3	1.5 × 10⁻³	1.7 × 10⁻²
C16orf87	388272	Q6PH81	1.3	1.0 × 10⁻²	4.6 × 10⁻²
ASB3	51130	Q9Y575	1.3	1.1 × 10⁻⁴	2.8 × 10⁻³
MSI2	124540	Q96DH6	1.3	1.2 × 10⁻³	1.6 × 10⁻²
MAN2A1	4124	Q16706	1.3	2.1 × 10⁻³	2.1 × 10⁻²
SDF2	6388	Q99470	1.3	1.0 × 10⁻²	4.7 × 10⁻²
RAP2B	5912	P61225	1.4	5.9 × 10⁻³	3.6 × 10⁻²
RAI1	10743	Q7Z5J4	1.4	1.3 × 10⁻³	1.7 × 10⁻²
BORCS6	54785	Q96GS4	1.4	8.0 × 10⁻³	4.1 × 10⁻²
OBSL1	23363	O75147	1.4	9.7 × 10⁻³	4.5 × 10⁻²
PPM1L	151742	Q5SGD2	1.4	6.0 × 10⁻³	3.6 × 10⁻²
UBXN4	23190	Q92575	1.4	3.5 × 10⁻³	2.7 × 10⁻²
GEMIN2	8487	O14893	1.4	7.8 × 10⁻³	4.1 × 10⁻²
MYCBP2	23077	O75592	1.4	8.4 × 10⁻⁴	1.3 × 10⁻²
WAPL	23063	Q7Z5K2	1.4	1.0 × 10⁻⁴	2.7 × 10⁻³
UFSP2	55325	Q9NUQ7	1.4	1.0 × 10⁻²	4.6 × 10⁻²
GPX8	493869	Q8TED1	1.4	6.0 × 10⁻³	3.6 × 10⁻²
GGCX	2677	P38435	1.4	8.9 × 10⁻³	4.4 × 10⁻²
NUBP2	10101	Q9Y5Y2	1.5	3.5 × 10⁻³	2.7 × 10⁻²
EXOSC5	56915	Q9NQT4	1.5	4.9 × 10⁻³	3.3 × 10⁻²
FKBP9	11328	O95302	1.5	8.0 × 10⁻³	4.2 × 10⁻²
MTMR14	64419	Q8NCE2	1.5	1.1 × 10⁻⁴	2.8 × 10⁻³
TSPYL1	7259	Q9H0U9	1.5	1.8 × 10⁻³	1.9 × 10⁻²
RBM45	129831	Q8IUH3	1.5	3.3 × 10⁻³	2.6 × 10⁻²
PGS1	9489	Q32NB8	1.5	3.4 × 10⁻³	2.6 × 10⁻²
SETD5	55209	Q9C0A6	1.5	4.1 × 10⁻³	2.9 × 10⁻²
DLGAP5	9787	Q15398	1.5	5.4 × 10⁻⁴	9.7 × 10⁻³
CIT	11113	O14578	1.5	5.7 × 10⁻³	3.5 × 10⁻²
RCE1	9986	Q9Y256	1.5	2.7 × 10⁻³	2.4 × 10⁻²
PODXL	5420	O00592	1.5	5.7 × 10⁻³	3.5 × 10⁻²
VAMP3	9341	Q15836	1.5	7.8 × 10⁻³	4.1 × 10⁻²
BTAF1	9044	O14981	1.5	9.7 × 10⁻⁴	1.4 × 10⁻²
ZBTB33	10009	Q86T24	1.5	6.7 × 10⁻³	3.8 × 10⁻²
FARP1	10160	Q9Y4F1	1.5	6.8 × 10⁻³	3.9 × 10⁻²
CLK4	57396	Q9HAZ1	1.5	9.7 × 10⁻³	4.5 × 10⁻²
URI1	8725	O94763	1.5	8.9 × 10⁻³	4.4 × 10⁻²
CNOT4	4850	O95628	1.5	2.4 × 10⁻³	2.3 × 10⁻²
UBP1	7342	Q9NZI7	1.5	5.2 × 10⁻³	3.3 × 10⁻²
CETN3	1070	O15182	1.5	3.3 × 10⁻³	2.6 × 10⁻²
CAMK1	8536	Q14012	1.5	1.0 × 10⁻²	4.7 × 10⁻²
SLC4A5	57835	Q9BY07	1.6	2.4 × 10⁻³	2.2 × 10⁻²
CNNM3	26505	Q8NE01	1.6	1.7 × 10⁻³	1.8 × 10⁻²
MICAL3	57553	Q7RTP6	1.6	1.1 × 10⁻²	4.9 × 10⁻²
HOXB9	3219	P17482	1.6	3.8 × 10⁻³	2.9 × 10⁻²
THEM6	51337	Q8WUY1	1.6	1.1 × 10⁻²	4.7 × 10⁻²
RBM23	55147	Q86U06	1.6	7.8 × 10⁻³	4.1 × 10⁻²
RALGAPB	57148	Q86X10	1.6	6.3 × 10⁻³	3.7 × 10⁻²
LRRC14	9684	Q15048	1.6	1.9 × 10⁻³	1.9 × 10⁻²
NDUFAF3	25915	Q9BU61	1.6	1.2 × 10⁻³	1.6 × 10⁻²
UQCRFS1	7386	P47985	1.6	9.0 × 10⁻³	4.4 × 10⁻²
GATD1	347862	Q8NB37	1.6	2.0 × 10⁻³	2.0 × 10⁻²
VPS13C	54832	Q709C8	1.6	9.7 × 10⁻⁴	1.4 × 10⁻²
LSM1	27257	O15116	1.6	2.2 × 10⁻³	2.2 × 10⁻²
ATF7	11016	P17544	1.6	9.2 × 10⁻³	4.4 × 10⁻²
WDTC1	23038	Q8N5D0	1.7	1.7 × 10⁻³	1.9 × 10⁻²
MPP7	143098	Q5T2T1	1.7	3.6 × 10⁻³	2.8 × 10⁻²
PPIL3	53938	Q9H2H8	1.7	3.1 × 10⁻³	2.5 × 10⁻²
SPTY2D1	144108	Q68D10	1.7	4.4 × 10⁻³	3.0 × 10⁻²
C9orf78	51759	Q9NZ63	1.7	5.7 × 10⁻⁴	9.9 × 10⁻³
LSM2	57819	Q9Y333	1.7	5.9 × 10⁻³	3.6 × 10⁻²
ATP5MF	9551	P56134	1.7	3.2 × 10⁻⁴	6.3 × 10⁻³
TXNL4A	10907	P83876	1.7	5.1 × 10⁻³	3.3 × 10⁻²
NEU1	4758	Q99519	1.7	7.5 × 10⁻³	4.0 × 10⁻²
ALDOB	229	P05062	1.7	3.2 × 10⁻³	2.6 × 10⁻²
ITGA2	3673	P17301	1.7	5.2 × 10⁻³	3.3 × 10⁻²
NQO2	4835	P16083	1.7	1.0 × 10⁻²	4.6 × 10⁻²
WBP4	11193	O75554	1.7	3.2 × 10⁻³	2.6 × 10⁻²
ENOX2	10495	Q16206	1.8	1.9 × 10⁻³	1.9 × 10⁻²
MTMR1	8776	Q13613	1.8	8.5 × 10⁻⁴	1.3 × 10⁻²
ERVK3-1	105372481	B3KNS4	1.8	8.4 × 10⁻⁴	1.3 × 10⁻²
GAMT	2593	Q14353	1.8	8.7 × 10⁻³	4.3 × 10⁻²
ZFC3H1	196441	O60293	1.8	2.0 × 10⁻³	2.0 × 10⁻²
PHKG2	5261	P15735	1.8	5.2 × 10⁻³	3.3 × 10⁻²
ZMYM1	79830	Q5SVZ6	1.8	1.6 × 10⁻³	1.8 × 10⁻²
MFN1	55669	Q8IWA4	1.8	1.1 × 10⁻²	4.9 × 10⁻²
SECISBP2	79048	Q96T21	1.8	2.0 × 10⁻³	2.0 × 10⁻²
TTC33	23548	Q6PID6	1.8	2.5 × 10⁻³	2.3 × 10⁻²
GPALPP1	55425	Q8IXQ4	1.8	1.8 × 10⁻⁴	4.1 × 10⁻³
VIRMA	25962	Q69YN4	1.8	1.8 × 10⁻⁴	4.1 × 10⁻³
NDUFA13	51079	Q9P0J0	1.8	7.1 × 10⁻⁴	1.1 × 10⁻²
SEPTIN6	23157	Q14141	1.9	3.9 × 10⁻⁴	7.3 × 10⁻³
DHRSX	207063	Q8N5I4	1.9	3.1 × 10⁻³	2.5 × 10⁻²
HSPB11	51668	Q9Y547	1.9	1.0 × 10⁻²	4.7 × 10⁻²
WRAP53	55135	Q9BUR4	1.9	7.3 × 10⁻³	4.0 × 10⁻²
TBL1X	6907	O60907	1.9	1.2 × 10⁻³	1.6 × 10⁻²
TTC28	23331	Q96AY4	1.9	2.9 × 10⁻³	2.4 × 10⁻²
RNASEH2C	84153	Q8TDP1	1.9	4.8 × 10⁻³	3.2 × 10⁻²
TMEM115	11070	Q12893	1.9	2.7 × 10⁻³	2.4 × 10⁻²
RPLP0	6175	P05388	1.9	2.3 × 10⁻⁴	4.9 × 10⁻³
COG5	10466	Q9UP83	1.9	1.5 × 10⁻³	1.7 × 10⁻²
TAX1BP1	8887	Q86VP1	1.9	3.2 × 10⁻³	2.6 × 10⁻²
MED1	5469	Q15648	2.0	3.1 × 10⁻³	2.5 × 10⁻²
RPAP1	26015	Q9BWH6	2.0	1.1 × 10⁻³	1.5 × 10⁻²
SEPTIN10	151011	Q9P0V9	2.0	6.7 × 10⁻³	3.8 × 10⁻²
KDM3A	55818	Q9Y4C1	2.0	4.8 × 10⁻³	3.2 × 10⁻²
SLC7A2	6542	P52569	2.0	3.8 × 10⁻³	2.9 × 10⁻²
BUB1	699	O43683	2.0	5.1 × 10⁻⁴	9.2 × 10⁻³
CASP8	841	Q14790	2.0	3.8 × 10⁻⁴	7.3 × 10⁻³
TBC1D2B	23102	Q9UPU7	2.0	2.5 × 10⁻³	2.3 × 10⁻²
KIF3B	9371	O15066	2.1	5.2 × 10⁻³	3.3 × 10⁻²
COL6A1	1291	P12109	2.1	4.9 × 10⁻³	3.3 × 10⁻²
CC2D1A	54862	Q6P1N0	2.1	2.6 × 10⁻⁴	5.4 × 10⁻³
SKA3	221150	Q8IX90	2.1	1.0 × 10⁻³	1.5 × 10⁻²
NCOA2	10499	Q15596	2.1	9.5 × 10⁻³	4.5 × 10⁻²
MTA3	57504	Q9BTC8	2.1	4.3 × 10⁻³	3.0 × 10⁻²
RPLP1	6176	P05386	2.1	1.4 × 10⁻³	1.7 × 10⁻²
CEP135	9662	Q66GS9	2.1	3.3 × 10⁻⁴	6.5 × 10⁻³
TPRKB	51002	Q9Y3C4	2.1	7.9 × 10⁻³	4.1 × 10⁻²
XPO6	23214	Q96QU8	2.1	9.1 × 10⁻³	4.4 × 10⁻²
GPC3	2719	P51654	2.2	4.6 × 10⁻⁴	8.5 × 10⁻³
DNTTIP1	116092	Q9H147	2.2	1.1 × 10⁻²	4.9 × 10⁻²
GTF2H3	2967	Q13889	2.2	4.0 × 10⁻³	2.9 × 10⁻²
EPN2	22905	O95208	2.2	3.3 × 10⁻³	2.6 × 10⁻²
NECTIN2	5819	Q92692	2.2	2.7 × 10⁻³	2.4 × 10⁻²
NFYA	4800	P23511	2.2	1.6 × 10⁻³	1.8 × 10⁻²
CPPED1	55313	Q9BRF8	2.2	1.4 × 10⁻³	1.7 × 10⁻²
CEMIP2	23670	Q9UHN6	2.2	1.7 × 10⁻³	1.8 × 10⁻²
TTC12	54970	Q9H892	2.3	1.3 × 10⁻⁴	3.2 × 10⁻³
CEP350	9857	Q5VT06	2.3	1.5 × 10⁻³	1.7 × 10⁻²
PALS1	64398	Q8N3R9	2.3	2.6 × 10⁻⁴	5.4 × 10⁻³
PUS3	83480	Q9BZE2	2.3	1.5 × 10⁻⁴	3.6 × 10⁻³
RETSAT	54884	Q6NUM9	2.4	4.3 × 10⁻³	3.0 × 10⁻²
RNF213	57674	Q63HN8	2.5	4.8 × 10⁻³	3.2 × 10⁻²
FIBP	9158	O43427	2.5	3.9 × 10⁻³	2.9 × 10⁻²
MGST1	4257	P10620	2.6	9.9 × 10⁻⁴	1.4 × 10⁻²
PIAS3	10401	Q9Y6X2	2.6	2.6 × 10⁻⁴	5.5 × 10⁻³
TNRC6A	27327	Q8NDV7	2.6	1.2 × 10⁻⁴	3.0 × 10⁻³
STAM2	10254	O75886	2.6	4.9 × 10⁻⁵	1.4 × 10⁻³
ACSS1	84532	Q9NUB1	2.7	1.0 × 10⁻³	1.4 × 10⁻²
METTL13	51603	Q8N6R0	2.7	1.7 × 10⁻⁴	4.0 × 10⁻³
NEK4	6787	P51957	2.7	3.6 × 10⁻⁴	7.0 × 10⁻³
CEP97	79598	Q8IW35	2.7	1.5 × 10⁻³	1.7 × 10⁻²
TAB2	23118	Q9NYJ8	2.8	3.0 × 10⁻³	2.5 × 10⁻²
RHBDD2	57414	Q6NTF9	2.8	1.3 × 10⁻⁴	3.1 × 10⁻³
SHC1	6464	P29353	2.8	7.8 × 10⁻³	4.1 × 10⁻²
UACA	55075	Q9BZF9	2.9	7.5 × 10⁻³	4.0 × 10⁻²
MAP7D2	256714	Q96T17	2.9	2.5 × 10⁻³	2.3 × 10⁻²
CSNK1E	1454	P49674	2.9	1.0 × 10⁻²	4.7 × 10⁻²
SOAT1	6646	P35610	3.0	9.0 × 10⁻⁴	1.3 × 10⁻²
FRYL	285527	O94915	3.0	7.8 × 10⁻⁵	2.1 × 10⁻³
KLF16	83855	Q9BXK1	3.1	1.2 × 10⁻³	1.6 × 10⁻²
MTHFS	10588	P49914	3.2	5.8 × 10⁻⁶	1.8 × 10⁻⁴
PPP2R5C	5527	Q13362	3.4	5.5 × 10⁻³	3.5 × 10⁻²
ZMYM2	7750	Q9UBW7	3.4	8.4 × 10⁻⁵	2.2 × 10⁻³
CCNA2	890	P20248	3.4	2.1 × 10⁻⁴	4.6 × 10⁻³
SLC12A9	56996	Q9BXP2	3.5	2.3 × 10⁻³	2.2 × 10⁻²
ARHGAP19	84986	Q14CB8	17.6	3.9 × 10⁻³	2.9 × 10⁻²
ARL14EP	120534	Q8N8R7	17.9	1.3 × 10⁻³	1.6 × 10⁻²
SHKBP1	92799	Q8TBC3	18.2	1.6 × 10⁻⁴	3.7 × 10⁻³
ASL	435	P04424	18.3	1.3 × 10⁻⁴	3.1 × 10⁻³
VMP1	81671	Q96GC9	18.4	5.0 × 10⁻⁵	1.4 × 10⁻³
RNF128	79589	Q8TEB7	18.4	3.9 × 10⁻⁵	1.1 × 10⁻³
RAP2A	5911	P10114	18.6	1.7 × 10⁻⁵	5.0 × 10⁻⁴
HMGCR	3156	P04035	18.6	1.5 × 10⁻⁵	4.6 × 10⁻⁴
C3orf38	285237	Q5JPI3	18.8	3.6 × 10⁻⁶	1.2 × 10⁻⁴
TRADD	8717	Q15628	18.8	3.9 × 10⁻⁶	1.3 × 10⁻⁴
ACADL	33	P28330	18.9	2.5 × 10⁻⁶	8.9 × 10⁻⁵
APOC3	345	P02656	18.9	2.6 × 10⁻⁶	9.0 × 10⁻⁵
ITPKA	3706	P23677	18.9	3.1 × 10⁻⁶	1.1 × 10⁻⁴
NAT1	9	P18440	19.0	1.4 × 10⁻⁶	5.5 × 10⁻⁵
PRNP	5621	P04156	19.0	1.4 × 10⁻⁶	5.5 × 10⁻⁵
MIS12	79003	Q9H081	19.0	2.8 × 10⁻⁶	9.8 × 10⁻⁵
GPM6B	2824	Q13491	19.1	7.4 × 10⁻⁷	3.3 × 10⁻⁵
AKTIP	64400	Q9H8T0	19.1	8.7 × 10⁻⁷	3.7 × 10⁻⁵
PASK	23178	Q96RG2	19.1	8.2 × 10⁻⁷	3.6 × 10⁻⁵
MSL2	55167	Q9HCI7	19.2	1.0 × 10⁻⁶	4.2 × 10⁻⁵
DIAPH2	1730	O60879	19.2	4.3 × 10⁻⁷	2.0 × 10⁻⁵
USP34	9736	Q70CQ2	19.3	1.1 × 10⁻⁶	4.5 × 10⁻⁵
IFI44L	10964	Q53G44	19.4	5.7 × 10⁻⁷	2.6 × 10⁻⁵
DNAJC16	23341	Q9Y2G8	19.4	2.0 × 10⁻⁷	1.2 × 10⁻⁵
PIP4P1	90809	Q86T03	19.4	1.1 × 10⁻⁷	8.0 × 10⁻⁶
TEAD1	7003	P28347	19.4	1.9 × 10⁻⁷	1.2 × 10⁻⁵
SLBP	7884	Q14493	19.4	1.3 × 10⁻⁷	8.4 × 10⁻⁶
CMTM7	112616	Q96FZ5	19.5	1.3 × 10⁻⁷	8.9 × 10⁻⁶
TMEM222	84065	Q9H0R3	19.5	3.0 × 10⁻⁷	1.5 × 10⁻⁵
ANGEL1	23357	Q9UNK9	19.6	2.1 × 10⁻⁷	1.2 × 10⁻⁵
GPATCH2	55105	Q9NW75	19.6	1.5 × 10⁻⁶	5.8 × 10⁻⁵
WRN	7486	Q14191	19.6	2.0 × 10⁻⁷	1.2 × 10⁻⁵
UBR2	23304	Q8IWV8	19.6	7.3 × 10⁻⁸	6.3 × 10⁻⁶
ANTKMT	65990	Q9BQD7	19.7	7.8 × 10⁻⁸	6.3 × 10⁻⁶
MAN1A2	10905	O60476	19.7	6.1 × 10⁻⁸	5.8 × 10⁻⁶
AKT3	10000	Q9Y243	19.8	1.9 × 10⁻⁷	1.2 × 10⁻⁵
FOXK2	3607	Q01167	19.8	2.9 × 10⁻⁷	1.5 × 10⁻⁵
PCGF5	84333	Q86SE9	19.9	3.1 × 10⁻⁶	1.1 × 10⁻⁴
SPINDOC	144097	Q9BUA3	19.9	1.4 × 10⁻⁷	9.3 × 10⁻⁶
RBM41	55285	Q96IZ5	20.0	2.6 × 10⁻⁷	1.4 × 10⁻⁵
PIGX	54965	Q8TBF5	20.0	3.0 × 10⁻⁷	1.5 × 10⁻⁵
FXYD6	53826	Q9H0Q3	20.0	2.1 × 10⁻⁷	1.2 × 10⁻⁵
GPRIN3	285513	Q6ZVF9	20.0	8.7 × 10⁻⁸	6.9 × 10⁻⁶
PSMG4	389362	Q5JS54	20.0	1.1 × 10⁻⁷	8.0 × 10⁻⁶
CINP	51550	Q9BW66	20.1	2.3 × 10⁻⁸	2.7 × 10⁻⁶
KIF5C	3800	O60282	20.1	1.7 × 10⁻⁸	2.7 × 10⁻⁶
HTATIP2	10553	Q9BUP3	20.1	4.9 × 10⁻⁶	1.6 × 10⁻⁴
INO80E	283899	Q8NBZ0	20.1	2.6 × 10⁻⁸	2.8 × 10⁻⁶
ATF2	1386	P15336	20.2	1.7 × 10⁻⁸	2.7 × 10⁻⁶
AKAP10	11216	O43572	20.2	6.6 × 10⁻⁸	6.1 × 10⁻⁶
MED30	90390	Q96HR3	20.3	2.1 × 10⁻⁸	2.7 × 10⁻⁶
LMBRD1	55788	Q9NUN5	20.3	2.3 × 10⁻⁷	1.2 × 10⁻⁵
CRAT	1384	P43155	20.3	9.3 × 10⁻⁷	3.9 × 10⁻⁵
JTB	10899	O76095	20.3	2.8 × 10⁻⁸	2.9 × 10⁻⁶
ITGA1	3672	P56199	20.3	1.9 × 10⁻⁸	2.7 × 10⁻⁶
SKA1	220134	Q96BD8	20.3	2.1 × 10⁻⁷	1.2 × 10⁻⁵
C16orf91	283951	Q4G0I0	20.4	7.0 × 10⁻⁸	6.3 × 10⁻⁶
EPHX2	2053	P34913	20.4	2.3 × 10⁻⁷	1.2 × 10⁻⁵
JADE3	9767	Q92613	20.5	5.1 × 10⁻⁸	5.0 × 10⁻⁶
GTF2A1	2957	P52655	20.5	8.7 × 10⁻⁹	2.7 × 10⁻⁶
GAP43	2596	P17677	20.5	2.4 × 10⁻⁸	2.7 × 10⁻⁶
LIN9	286826	Q5TKA1	20.6	1.6 × 10⁻⁶	6.1 × 10⁻⁵
DGUOK	1716	Q16854	20.6	3.7 × 10⁻⁹	2.6 × 10⁻⁶
TIMM17B	10245	O60830	20.6	2.5 × 10⁻⁶	8.9 × 10⁻⁵
SPOP	8405	O43791	20.7	8.9 × 10⁻⁸	6.9 × 10⁻⁶
MED7	9443	O43513	20.7	1.5 × 10⁻⁸	2.7 × 10⁻⁶
FBXO38	81545	Q6PIJ6	20.7	1.4 × 10⁻⁶	5.5 × 10⁻⁵
UGT2A3	79799	Q6UWM9	20.8	3.2 × 10⁻⁷	1.5 × 10⁻⁵
STMN3	50861	Q9NZ72	20.9	1.6 × 10⁻⁸	2.7 × 10⁻⁶
TRUB2	26995	O95900	20.9	6.1 × 10⁻⁹	2.6 × 10⁻⁶
FAM98C	147965	Q17RN3	20.9	4.4 × 10⁻⁹	2.6 × 10⁻⁶
RBMS2	5939	Q15434	21.0	3.5 × 10⁻⁷	1.6 × 10⁻⁵
ISOC2	79763	Q96AB3	21.1	1.6 × 10⁻⁶	5.9 × 10⁻⁵
BRPF3	27154	Q9ULD4	21.1	1.6 × 10⁻⁷	1.0 × 10⁻⁵
PRELID3B	51012	Q9Y3B1	21.1	6.8 × 10⁻⁶	2.1 × 10⁻⁴
CNOT11	55571	Q9UKZ1	21.1	2.2 × 10⁻⁶	8.2 × 10⁻⁵
ABCC5	10057	O15440	21.3	9.6 × 10⁻⁹	2.7 × 10⁻⁶
MAN1A1	4121	P33908	21.3	7.8 × 10⁻⁵	2.1 × 10⁻³
SDC1	6382	P18827	21.3	2.4 × 10⁻⁸	2.7 × 10⁻⁶
COLEC12	81035	Q5KU26	21.4	5.3 × 10⁻⁹	2.6 × 10⁻⁶
BTBD1	53339	Q9H0C5	21.5	1.5 × 10⁻⁶	5.8 × 10⁻⁵
TMEM200A	114801	Q86VY9	21.5	1.1 × 10⁻⁷	8.0 × 10⁻⁶
KMT2C	58508	Q8NEZ4	21.7	7.7 × 10⁻⁸	6.3 × 10⁻⁶
NDUFB1	4707	O75438	21.8	5.1 × 10⁻⁷	2.3 × 10⁻⁵
FDX2	112812	Q6P4F2	22.0	3.8 × 10⁻⁶	1.2 × 10⁻⁴
ACTBL2	345651	Q562R1	23.5	1.1 × 10⁻⁴	2.8 × 10⁻³
WDR81	124997	Q562E7	23.5	2.0 × 10⁻⁹	2.6 × 10⁻⁶
CROT	54677	Q9UKG9	24.0	6.5 × 10⁻⁹	2.6 × 10⁻⁶

## Sheet: Metabolomics
HMDB	Name	logFC (Y641F/WT)	p-value	q-value	ESI mode
HMDB0000094	Citric acid	2.4	4.8 × 10⁻⁴	1.7 × 10⁻²	neg
HMDB0001511	Phosphocreatine	1.7	2.8 × 10⁻⁴	1.3 × 10⁻²	neg
HMDB0001624	2-Hydroxycaproic acid	1.6	2.8 × 10⁻³	4.5 × 10⁻²	neg
HMDB0000086	Glycerophosphocholine	1.5	1.2 × 10⁻⁴	1.3 × 10⁻²	neg
HMDB0000114	Glycerylphosphorylethanolamine	1.1	6.6 × 10⁻⁴	3.0 × 10⁻²	pos
HMDB0028815	Glutamylaspartic acid	0.7	8.3 × 10⁻⁴	2.4 × 10⁻²	neg
HMDB0000902	NAD+	0.5	2.4 × 10⁻⁴	1.3 × 10⁻²	neg
HMDB0000285	UTP	0.5	1.9 × 10⁻³	4.3 × 10⁻²	neg
HMDB0006831	3-Dehydroxycarnitine	-0.6	9.0 × 10⁻⁴	3.2 × 10⁻²	pos
HMDB0000479	3-Methylhistidine	-1.3	1.1 × 10⁻⁴	1.0 × 10⁻²	pos
HMDB0000062	L-Carnitine	-1.3	1.9 × 10⁻³	5.0 × 10⁻²	pos
