# Supplementary material for: Integrative Multi-Omics Analysis of Oncogenic EZH2 Mutants: From Epigenetic Reprogramming to Molecular Signatures
Source: Int J Mol Sci. 2023 Jul 12;24(14):11378. doi: 10.3390/ijms241411378 (PMC10380343; doi:10.3390/ijms241411378)
Supplement: Supplementary file 1 [file ijms-24-11378-s001.zip › Supplementary_Table_S5.xlsx]

## Sheet: RNA-Seq
Symbol	EntrezID	Uniprot	logFC (DM/WT)	p-value	q-value
ITM2A	9452	O43736	2.9	1.9 × 10⁻⁶	1.1 × 10⁻³
MMP14	4323	P50281	2.7	6.0 × 10-13	2.4 × 10⁻⁹
PKP3	11187	Q9Y446	1.7	4.0 × 10⁻⁴	4.6 × 10⁻²
TCIM	56892	Q9NR00	1.3	1.2 × 10⁻⁸	2.8 × 10⁻⁵
APOBEC3B	9582	Q9UH17	1.3	3.6 × 10⁻⁷	3.1 × 10⁻⁴
SNORA33	594839		0.9	1.9 × 10⁻⁴	2.9 × 10⁻²
ADAMTS5	11096	Q9UNA0	0.6	2.8 × 10⁻⁶	1.4 × 10⁻³
EPPK1	83481	A0A087X1U6	0.6	5.8 × 10⁻⁵	1.3 × 10⁻²
GTSF1	121355	A0A024RB57	0.6	1.2 × 10⁻⁵	4.2 × 10⁻³
TENM1	10178	Q9UKZ4	0.6	1.9 × 10⁻⁸	3.2 × 10⁻⁵
MAGEA1	4100	P43355	0.5	1.0 × 10⁻⁷	1.1 × 10⁻⁴
COL5A2	1290	P05997	0.5	4.0 × 10⁻⁶	1.8 × 10⁻³
TMSB4X	7114	A2VCK8	0.4	4.6 × 10⁻⁶	2.0 × 10⁻³
LCP1	3936	A0A024RDT4	0.4	2.4 × 10⁻⁹	7.2 × 10⁻⁶
RASSF2	9770	P50749	0.4	1.4 × 10⁻⁴	2.4 × 10⁻²
EZH2	2146	Q15910	0.4	6.0 × 10⁻¹⁶	7.3 × 10⁻¹²
LGALS3BP	3959	A0A0S2Z3Y1	0.4	4.4 × 10⁻⁴	4.9 × 10⁻²
FRMD4B	23150	B3KNA2	0.4	4.5 × 10⁻⁴	5.0 × 10⁻²
SLC7A11	23657	Q9UPY5	0.3	1.5 × 10⁻⁸	2.9 × 10⁻⁵
CRABP2	1382	P29373	0.3	3.0 × 10⁻⁴	3.9 × 10⁻²
STAT6	6778	P42226	0.3	2.9 × 10⁻⁴	3.8 × 10⁻²
FADS2	9415	O95864	0.3	5.6 × 10⁻⁶	2.3 × 10⁻³
SPARC	6678	P09486	0.3	9.0 × 10⁻⁷	6.0 × 10⁻⁴
GPCPD1	56261	Q9NPB8	0.3	1.5 × 10⁻⁴	2.5 × 10⁻²
CD9	928	A6NNI4	0.3	7.2 × 10⁻⁵	1.5 × 10⁻²
SPINT2	10653	A0A140VJV6	0.3	2.7 × 10⁻⁵	7.9 × 10⁻³
CA8	767	P35219	0.3	3.7 × 10⁻⁴	4.4 × 10⁻²
SELENOW	6415	P63302	0.3	4.5 × 10⁻⁴	5.0 × 10⁻²
ADAMTS1	9510	B2RB33	0.2	2.2 × 10⁻⁷	2.1 × 10⁻⁴
MAGEA6	4105	P43360	0.2	3.4 × 10⁻⁴	4.2 × 10⁻²
GPC3	2719	P51654	0.2	2.3 × 10⁻⁴	3.3 × 10⁻²
UBE2E1	7324	P51965	0.2	1.1 × 10⁻⁶	7.0 × 10⁻⁴
ITGA6	3655	P23229	0.2	3.4 × 10⁻⁴	4.2 × 10⁻²
PTPRA	5786	P18433	0.2	1.6 × 10⁻⁴	2.6 × 10⁻²
FER	2241	P16591	0.2	2.0 × 10⁻⁴	3.0 × 10⁻²
ZNF711	7552	Q9Y462	0.2	4.7 × 10⁻⁵	1.2 × 10⁻²
ALDH1A2	8854	O94788	0.2	1.4 × 10⁻⁴	2.5 × 10⁻²
CCND1	595	P24385	0.2	4.9 × 10⁻⁵	1.2 × 10⁻²
PCNA	5111	P12004	0.2	4.0 × 10⁻⁶	1.8 × 10⁻³
TMX4	56255	Q9H1E5	0.2	8.0 × 10⁻⁵	1.6 × 10⁻²
HEY1	23462	Q9Y5J3	0.2	2.5 × 10⁻⁵	7.4 × 10⁻³
TRAM1	23471	Q15629	0.2	2.5 × 10⁻⁵	7.4 × 10⁻³
RAB2A	5862	P61019	0.2	3.8 × 10⁻⁴	4.4 × 10⁻²
PRPS1	5631	B7ZB02	0.2	4.1 × 10⁻⁵	1.1 × 10⁻²
SNX5	27131	Q6P5V6	0.2	4.4 × 10⁻⁵	1.1 × 10⁻²
H1-3	3007	P16402	0.1	9.6 × 10⁻⁵	1.9 × 10⁻²
NOP56	10528	O00567	0.1	2.2 × 10⁻⁴	3.2 × 10⁻²
TPT1	7178	A0A0B4J2C3	0.1	4.0 × 10⁻⁴	4.6 × 10⁻²
RN7SK	125050		0.1	7.7 × 10⁻⁵	1.6 × 10⁻²
GPI	2821	P06744	-0.1	2.7 × 10⁻⁴	3.7 × 10⁻²
TCOF1	6949	Q13428	-0.1	3.7 × 10⁻⁴	4.4 × 10⁻²
CHD8	57680	Q9HCK8	-0.1	3.2 × 10⁻⁴	4.1 × 10⁻²
PRRC2B	84726	Q5JSZ5	-0.1	7.9 × 10⁻⁵	1.6 × 10⁻²
HSPA1B	3304	A8K5I0	-0.1	8.1 × 10⁻⁶	3.2 × 10⁻³
PPP1R15B	84919		-0.1	3.4 × 10⁻⁴	4.2 × 10⁻²
SNTB2	6645	A0A024R732	-0.2	4.0 × 10⁻⁴	4.6 × 10⁻²
FLNA	2316	P21333	-0.2	6.9 × 10⁻⁷	5.1 × 10⁻⁴
MYC	4609	A0A087WVR4	-0.2	1.6 × 10⁻⁴	2.6 × 10⁻²
ATAD3B	83858	Q5T9A4	-0.2	1.2 × 10⁻⁴	2.2 × 10⁻²
ZIC2	7546	A0A024RDY6	-0.2	2.9 × 10⁻⁴	3.8 × 10⁻²
MAML1	9794	Q92585	-0.2	1.5 × 10⁻⁴	2.6 × 10⁻²
PAK2	5062	A8K5M4	-0.2	1.4 × 10⁻⁴	2.4 × 10⁻²
ILRUN	64771	Q9H6K1	-0.2	3.4 × 10⁻⁵	9.0 × 10⁻³
FLT4	2324	P35916	-0.2	1.9 × 10⁻⁴	2.9 × 10⁻²
MKNK2	2872	Q9HBH9	-0.2	4.8 × 10⁻⁵	1.2 × 10⁻²
JAG2	3714	Q9Y219	-0.2	1.9 × 10⁻⁴	2.9 × 10⁻²
GNB1	2782	B3KVK2	-0.2	7.2 × 10⁻⁷	5.1 × 10⁻⁴
TNRC18	84629	A3KMH2	-0.2	8.9 × 10⁻⁶	3.3 × 10⁻³
NEFL	4747	P07196	-0.2	1.5 × 10⁻⁶	8.8 × 10⁻⁴
CIC	23152	Q96RK0	-0.2	2.4 × 10⁻⁴	3.3 × 10⁻²
RAVER1	125950	E9PAU2	-0.2	3.1 × 10⁻⁵	8.4 × 10⁻³
NDRG1	10397	Q92597	-0.2	2.1 × 10⁻⁵	6.6 × 10⁻³
ZCCHC12	170261	Q6PEW1	-0.2	2.2 × 10⁻⁴	3.2 × 10⁻²
FOXD1	2297	Q16676	-0.2	2.1 × 10⁻⁴	3.1 × 10⁻²
ZNF142	7701	P52746	-0.2	2.5 × 10⁻⁴	3.4 × 10⁻²
POM121	9883	Q96HA1	-0.2	6.0 × 10⁻⁵	1.4 × 10⁻²
PER1	5187	O15534	-0.2	3.3 × 10⁻⁴	4.2 × 10⁻²
WIZ	58525	O95785	-0.2	3.0 × 10⁻⁵	8.3 × 10⁻³
SRM	6723	P19623	-0.2	3.2 × 10⁻⁵	8.5 × 10⁻³
POU3F3	5455	P20264	-0.2	3.8 × 10⁻⁶	1.8 × 10⁻³
SAP30	8819	O75446	-0.3	3.5 × 10⁻⁴	4.3 × 10⁻²
EML5	161436	Q05BV3	-0.3	6.8 × 10⁻⁵	1.5 × 10⁻²
DIAPH1	1729	O60610	-0.3	7.3 × 10⁻⁸	8.9 × 10⁻⁵
ZNF703	80139	Q9H7S9	-0.3	6.9 × 10⁻⁷	5.1 × 10⁻⁴
DPYSL3	1809	A0A140VK07	-0.3	2.0 × 10⁻⁷	2.0 × 10⁻⁴
BAHCC1	57597	A0A075B747	-0.3	5.9 × 10⁻⁶	2.4 × 10⁻³
ENDOG	2021	E5KNL5	-0.3	3.0 × 10⁻⁴	3.8 × 10⁻²
ABCD1	215	P33897	-0.3	4.5 × 10⁻⁸	6.4 × 10⁻⁵
TRIB2	28951	Q92519	-0.3	7.1 × 10⁻⁵	1.5 × 10⁻²
SLC25A19	60386	Q5JPC1	-0.3	2.4 × 10⁻⁴	3.4 × 10⁻²
NEFM	4741	Q9UK51	-0.4	3.8 × 10⁻¹³	2.3 × 10⁻⁹
NALF2	27112	O75949	-0.4	9.9 × 10⁻⁶	3.5 × 10⁻³
FNDC10	643988	F2Z333	-0.4	5.0 × 10⁻⁵	1.2 × 10⁻²
MAGEB2	4113	O15479	-0.5	1.6 × 10⁻⁴	2.6 × 10⁻²
INSM1	3642	Q01101	-0.6	2.7 × 10⁻⁴	3.7 × 10⁻²
DNAH1	25981	A0A140VJI6	-0.7	1.7 × 10⁻⁵	5.4 × 10⁻³
SFRP2	6423	A0A140VJU3	-0.7	8.6 × 10⁻⁶	3.3 × 10⁻³
TOX3	27324	O15405	-0.7	1.7 × 10⁻⁴	2.7 × 10⁻²
DSEL	92126	Q8IZU8	-0.8	2.0 × 10⁻⁶	1.1 × 10⁻³
KCNA3	3738	P22001	-0.8	1.3 × 10⁻⁴	2.3 × 10⁻²
FLRT2	23768	O43155	-0.9	4.8 × 10⁻⁸	6.4 × 10⁻⁵
KCNS3	3790	Q9BQ31	-1.0	1.2 × 10⁻⁴	2.3 × 10⁻²
KCNK2	3776	O95069	-1.0	3.9 × 10⁻⁶	1.8 × 10⁻³
BHLHE22	27319	B4DF88	-1.1	1.0 × 10⁻⁴	1.9 × 10⁻²
GABBR2	9568	H9NIL8	-1.2	2.1 × 10⁻⁴	3.1 × 10⁻²
B3GALT1	8708	Q9Y5Z6	-1.4	7.2 × 10⁻⁵	1.5 × 10⁻²
NPY5R	4889	Q15761	-1.4	3.8 × 10⁻⁴	4.4 × 10⁻²
H3C11	8354	P68431	-1.6	1.2 × 10⁻⁴	2.3 × 10⁻²
NWD2	57495	Q9ULI1	-2.3	1.5 × 10⁻⁵	5.1 × 10⁻³
ST6GAL2	84620	Q96JF0	-2.4	2.2 × 10⁻⁵	6.9 × 10⁻³

## Sheet: Proteomics
Symbol	EntrezID	Uniprot	logFC (DM/WT)	p-value	q-value
ZNF706	51123	Q9Y5V0	-21.2	2.8 × 10⁻⁷	4.9 × 10⁻⁵
PIM1	5292	P11309	-20.7	7.3 × 10⁻⁸	3.3 × 10⁻⁵
DNMT3A	1788	Q9Y6K1	-20.7	1.5 × 10⁻⁷	3.6 × 10⁻⁵
HYCC1	84668	Q9BYI3	-20.1	9.6 × 10⁻⁸	3.5 × 10⁻⁵
NR2C1	7181	P13056	-19.8	3.0 × 10⁻⁷	4.9 × 10⁻⁵
ND6	4541	P03923	-19.0	2.9 × 10⁻⁷	4.9 × 10⁻⁵
SGO2	151246	Q562F6	-17.5	8.9 × 10⁻⁴	4.6 × 10⁻²
BAP1	8314	Q92560	-17.5	8.9 × 10⁻⁴	4.6 × 10⁻²
B3GAT3	26229	O94766	-2.9	6.8 × 10⁻⁴	3.9 × 10⁻²
TUBGCP3	10426	Q96CW5	-2.2	9.5 × 10⁻⁴	4.9 × 10⁻²
ARPC4	10093	P59998	-2.0	2.0 × 10⁻⁴	1.6 × 10⁻²
SEH1L	81929	Q96EE3	-1.4	8.3 × 10⁻⁴	4.5 × 10⁻²
GTF2B	2959	Q00403	-1.1	3.7 × 10⁻⁴	2.4 × 10⁻²
H2BK1	114483833	A0A2R8Y619	-1.0	5.1 × 10⁻⁴	3.0 × 10⁻²
ACADM	34	P11310	-0.8	4.3 × 10⁻⁴	2.8 × 10⁻²
MYDGF	56005	Q969H8	-0.8	4.4 × 10⁻⁴	2.8 × 10⁻²
CA2	760	P00918	-0.7	2.4 × 10⁻⁴	1.8 × 10⁻²
NSFL1C	55968	Q9UNZ2	-0.7	1.3 × 10⁻⁴	1.1 × 10⁻²
HNRNPC	3183	P07910	-0.6	8.3 × 10⁻⁴	4.5 × 10⁻²
PGAM5	192111	Q96HS1	-0.6	6.4 × 10⁻⁴	3.7 × 10⁻²
AMOT	154796	Q4VCS5	-0.5	5.9 × 10⁻⁴	3.5 × 10⁻²
YARS1	8565	P54577	-0.5	2.4 × 10⁻⁴	1.8 × 10⁻²
NOL11	25926	Q9H8H0	-0.5	4.2 × 10⁻⁴	2.7 × 10⁻²
AK2	204	P54819	-0.4	4.9 × 10⁻⁴	3.0 × 10⁻²
LMNB1	4001	P20700	-0.4	7.8 × 10⁻⁴	4.4 × 10⁻²
TAGLN2	8407	P37802	0.4	2.5 × 10⁻⁴	1.8 × 10⁻²
PTPN1	5770	P18031	0.5	1.6 × 10⁻⁴	1.3 × 10⁻²
DNAJB1	3337	P25685	0.7	9.8 × 10⁻⁴	4.9 × 10⁻²
DNM2	1785	P50570	0.8	5.0 × 10⁻⁴	3.0 × 10⁻²
RPLP1	6176	P05386	1.7	3.0 × 10⁻⁴	2.1 × 10⁻²
ND2	4536	P03891	1.7	1.5 × 10⁻⁴	1.2 × 10⁻²
WDTC1	23038	Q8N5D0	1.7	3.2 × 10⁻⁴	2.2 × 10⁻²
UBAC1	10422	Q9BSL1	1.7	2.9 × 10⁻⁴	2.1 × 10⁻²
DLGAP5	9787	Q15398	1.8	9.9 × 10⁻⁴	4.9 × 10⁻²
WBP4	11193	O75554	2.0	8.0 × 10⁻⁴	4.4 × 10⁻²
NFYA	4800	P23511	2.0	3.4 × 10⁻⁴	2.3 × 10⁻²
STAM2	10254	O75886	2.8	4.4 × 10⁻⁵	3.9 × 10⁻³
TOR1B	27348	O14657	3.0	1.5 × 10⁻⁶	1.9 × 10⁻⁴
LTO1	220064	Q8WV07	17.8	1.9 × 10⁻⁴	1.5 × 10⁻²
CENPQ	55166	Q7L2Z9	17.9	6.9 × 10⁻⁵	6.0 × 10⁻³
KLHL18	23276	O94889	18.1	2.6 × 10⁻⁵	2.4 × 10⁻³
SERGEF	26297	Q9UGK8	18.2	1.6 × 10⁻⁵	1.5 × 10⁻³
APOC3	345	P02656	18.2	1.1 × 10⁻⁵	1.1 × 10⁻³
SDHAF2	54949	Q9NX18	18.2	1.1 × 10⁻⁵	1.1 × 10⁻³
ZCCHC12	170261	Q6PEW1	18.4	5.1 × 10⁻⁶	5.9 × 10⁻⁴
ANGEL1	23357	Q9UNK9	18.4	3.9 × 10⁻⁶	4.6 × 10⁻⁴
ZNF579	163033	Q8NAF0	18.7	1.6 × 10⁻⁶	2.0 × 10⁻⁴
EGFR	1956	P00533	18.8	1.8 × 10⁻⁶	2.1 × 10⁻⁴
KIF5C	3800	O60282	18.9	5.1 × 10⁻⁷	7.8 × 10⁻⁵
CSNK1G2	1455	P78368	19.0	2.6 × 10⁻⁷	4.9 × 10⁻⁵
FDX2	112812	Q6P4F2	19.0	8.4 × 10⁻⁷	1.2 × 10⁻⁴
MOSPD1	56180	Q9UJG1	19.1	1.7 × 10⁻⁷	3.6 × 10⁻⁵
GLRX2	51022	Q9NS18	19.1	1.6 × 10⁻⁷	3.6 × 10⁻⁵
MAGI1	9223	Q96QZ7	19.1	1.7 × 10⁻⁷	3.6 × 10⁻⁵
TCP11L1	55346	Q9NUJ3	19.1	5.0 × 10⁻⁷	7.8 × 10⁻⁵
PSMG4	389362	Q5JS54	19.2	1.5 × 10⁻⁷	3.6 × 10⁻⁵
GSPT2	23708	Q8IYD1	19.4	1.0 × 10⁻⁷	3.5 × 10⁻⁵
UXT	8409	Q9UBK9	19.4	1.1 × 10⁻⁶	1.5 × 10⁻⁴
MED22	6837	Q15528	19.5	3.6 × 10⁻⁸	2.8 × 10⁻⁵
FER	2241	P16591	19.5	8.2 × 10⁻⁷	1.2 × 10⁻⁴
LMBRD1	55788	Q9NUN5	19.6	1.8 × 10⁻⁷	3.6 × 10⁻⁵
SPOP	8405	O43791	19.7	3.0 × 10⁻⁸	2.8 × 10⁻⁵
SCOC	60592	Q9UIL1	19.7	3.9 × 10⁻⁸	2.8 × 10⁻⁵
JADE3	9767	Q92613	19.7	1.0 × 10⁻⁷	3.5 × 10⁻⁵
UBR2	23304	Q8IWV8	19.8	5.6 × 10⁻⁶	6.2 × 10⁻⁴
NKX2-4	644524	Q9H2Z4	20.0	1.2 × 10⁻⁷	3.5 × 10⁻⁵
GTF2A1	2957	P52655	20.3	2.9 × 10⁻⁸	2.8 × 10⁻⁵
MAN1A1	4121	P33908	20.7	2.5 × 10⁻⁵	2.4 × 10⁻³
CNEP1R1	255919	Q8N9A8	20.7	1.3 × 10⁻⁸	2.8 × 10⁻⁵
ZC3H11B	643136	A0A1B0GTU1	21.2	4.6 × 10⁻⁸	2.8 × 10⁻⁵
NDUFB1	4707	O75438	21.6	1.1 × 10⁻⁵	1.1 × 10⁻³
PLP2	5355	Q04941	21.6	7.2 × 10⁻⁸	3.3 × 10⁻⁵
WDR81	124997	Q562E7	22.0	9.9 × 10⁻⁶	1.1 × 10⁻³

## Sheet: Metabolomics
HMDB	Name	logFC (DM/WT)	p-value	q-value	ESI mode
HMDB0000094	Citric acid	4.2	1.7 × 10⁻⁴	3.9 × 10⁻³	neg
HMDB0000812	Acetyl-L-aspartic acid	3.5	2.6 × 10⁻³	1.5 × 10⁻²	neg
HMDB0000696	Methionine	1.8	1.8 × 10⁻³	1.2 × 10⁻²	pos
HMDB0001511	Phosphocreatine	1.8	5.5 × 10⁻⁵	2.7 × 10⁻³	neg
HMDB0000688	Isovalerylcarnitine	1.6	5.0 × 10⁻³	2.2 × 10⁻²	pos
HMDB0000162	Proline	1.6	7.2 × 10⁻³	2.8 × 10⁻²	pos
HMDB0000114	Glycerylphosphorylethanolamine	1.6	2.5 × 10⁻⁴	3.9 × 10⁻³	neg
HMDB0001557	Riboflavin reduced	1.6	6.6 × 10⁻³	2.6 × 10⁻²	pos
HMDB0011745	N-Acetyl-L-methionine	1.5	4.7 × 10⁻³	2.3 × 10⁻²	neg
HMDB0001138	Acetyl-L-glutamic acid	1.4	5.0 × 10⁻⁴	4.8 × 10⁻³	neg
HMDB0000086	Glycerophosphocholine	1.4	3.9 × 10⁻⁵	1.5 × 10⁻³	pos
HMDB0060244	Phosphodimethylethanolamine	0.6	1.9 × 10⁻³	1.2 × 10⁻²	pos
HMDB0000902	NAD	0.5	8.7 × 10⁻⁴	7.1 × 10⁻³	neg
HMDB0000285	UTP	0.4	1.0 × 10⁻²	3.8 × 10⁻²	neg
HMDB0001325	N6,N6,N6-Trimethyl -L-Lysine	-0.4	3.3 × 10⁻³	1.8 × 10⁻²	pos
HMDB0000883	L-Valine	-0.4	1.0 × 10⁻³	8.7 × 10⁻³	pos
HMDB0000159	L-Phenylalanine	-0.6	4.7 × 10⁻⁵	1.5 × 10⁻³	pos
HMDB0000177	L-Histidine	-0.8	1.2 × 10⁻³	8.7 × 10⁻³	pos
HMDB0013220	Beta-Citryl-glutamic acid	-0.8	2.0 × 10⁻³	1.2 × 10⁻²	neg
HMDB0006831	3-Dehydroxycarnitine	-1.0	5.6 × 10⁻⁴	6.4 × 10⁻³	pos
HMDB0000210	Pantothenic acid	-1.0	2.7 × 10⁻⁴	3.9 × 10⁻³	neg
HMDB0001276	N8-Acetylspermidine	-1.1	3.8 × 10⁻³	1.9 × 10⁻²	pos
HMDB0032055	N-Acetylhistidine	-1.3	2.0 × 10⁻³	1.3 × 10⁻²	pos
HMDB0000064	Creatine	-1.5	6.2 × 10⁻³	2.5 × 10⁻²	pos
HMDB0000062	L-Carnitine	-1.5	1.8 × 10⁻⁴	3.3 × 10⁻³	pos
HMDB0000929	L-Tryptophan	-1.5	6.4 × 10⁻⁴	6.8 × 10⁻³	pos
HMDB0029110	Tyrosyl-Lysine	-1.6	8.0 × 10⁻⁵	2.1 × 10⁻³	pos
HMDB0000716	L-Pipecolic acid	-1.8	1.0 × 10⁻²	3.7 × 10⁻²	pos
HMDB0000695	Ketoleucine	-1.9	1.0 × 10⁻⁴	3.7 × 10⁻³	neg
HMDB0001406	Niacinamide	-2.6	4.3 × 10⁻⁵	1.5 × 10⁻³	pos
HMDB0000235	Thiamine	-2.8	1.1 × 10⁻³	8.7 × 10⁻³	pos
HMDB0000122	Glucose	-3.4	9.9 × 10⁻³	3.8 × 10⁻²	neg
HMDB0010383	PC(16:1)	-3.6	3.5 × 10⁻³	1.8 × 10⁻²	pos
HMDB0000038	Dihydrobiopterin	-3.7	8.0 × 10⁻⁴	8.1 × 10⁻³	pos
